# 1                    **Distinct sources and behavioral correlates of** 2                    **macaque motor cortical low and high beta**

3                    Simon Nougaret<sup>1,\*</sup>, Laura López-Galdo<sup>1</sup>, Emile Caytan<sup>1,2</sup>, Julien Poitreau<sup>1,3</sup>,  
4                    Frederic V Barthelemy<sup>4,1</sup>, Bjørg Elisabeth Kilavik<sup>1,\*</sup>

5  
6                    <sup>1</sup> Institut de Neurosciences de la Timone (INT), UMR 7289, CNRS, Aix-Marseille Université,  
7 Marseille 13005, France

8                    <sup>2</sup> Current address: University of Crete, Faculty of Medicine & Foundation for Research and  
9 Technology Hellas, Institute of Applied and Computational Mathematics, Heraklion 70013, Greece

10                    <sup>3</sup> Current address : Laboratoire de Neurosciences Cognitives (LNC), UMR 7291, CNRS, Aix-Marseille  
11 Université, Marseille, France

12                    <sup>4</sup> Institute of Neuroscience and Medicine (INM-6) and JARA Institute Brain Structure-Function  
13 Relationships (INM-10), Jülich Research Centre, Jülich, Germany

14                    \*Corresponding authors: [Simon.Nougaret@univ-amu.fr](mailto:Simon.Nougaret@univ-amu.fr), [Bjorg.Kilavik@univ-amu.fr](mailto:Bjorg.Kilavik@univ-amu.fr)

## 15 16                    **HIGHLIGHTS:**

- 17                    • The low beta rhythm is dominant in M1 and the high beta rhythm in PMd
- 18                    • The beta rhythms correlate with task-instructed and uninstructed behavior
- 19                    • Low beta reflects movement preparation and spontaneous postural dynamics
- 20                    • High beta reflects temporal task prediction and dynamical visuospatial attention

21  
22                    **BRIEF SUMMARY:** Nougaret et al. find that low and high beta rhythms co-reside in motor cortex.

23 Low beta dominates in M1 and reflects movement preparation but also uninstructed postural  
24 changes. High beta dominates in PMd and reflects temporal task prediction but also fluctuations in  
25 focal overt attention dedicated to the behavioral task.

26  
27                    **Keywords:** macaque, local field potentials, motor cortex, beta rhythms, spontaneous movements,  
28 postural control, movement preparation, attention, anticipation

29        **SUMMARY**

30        Low and high beta frequency rhythms were observed in motor cortex, but their respective  
31 sources and behavioral correlates remain unknown. We studied local field potentials during pre-cued  
32 reaching behavior in macaques. They contained a low beta band (<20Hz) dominant in primary motor  
33 cortex and a high beta band (>20Hz) dominant in dorsal premotor cortex. Low beta correlated  
34 positively with behavioral reaction time, from visual cue onset, and negatively with uninstructed  
35 hand postural micro-movements throughout the trial. High beta reflected temporal task prediction,  
36 with selective modulations before and during cues that were enhanced in moments of increased  
37 focal attention, when the gaze was on the work area. This double-dissociation in cortical sources and  
38 behavioral correlates of motor cortical low and high beta, with respect to both task-instructed and  
39 spontaneous behavior, reconciles the largely disparate roles proposed for the beta rhythm, by  
40 suggesting band-specific roles in both movement control and spatio-temporal attention.

41

## 42 INTRODUCTION

43 A link between the beta rhythm in human sensorimotor cortex and voluntary movements was  
44 established almost 75 years ago (Jasper and Penfield 1949). Yet, the functional role of sensorimotor  
45 beta remains elusive. Beta was associated with many aspects of motor behavior, ranging from motor  
46 cortical idling or postural maintenance (e.g. Salmelin et al. 1995; Conway et al. 1995; Baker et al.  
47 1999; Brown 2000; Engel and Fries 2010; van Ede et al. 2010, 2011; Jenkinson and Brown 2011;  
48 Khanna and Carmena 2017; Peles et al. 2020) to sensorimotor integration or temporal predictions  
49 (e.g. Murthy and Fetz 1992, 1996; Sanes and Donoghue 1993; Rubino et al. 2006; Androulidakis et al.  
50 2006; Lalo et al. 2007; Saleh et al. 2010; Fujioka et al. 2012; Kilavik et al. 2014; Wiener et al. 2018;  
51 Sun et al. 2021). As beta rhythms were observed in many cortical and sub-cortical regions and in  
52 many different behavioral contexts, they might serve multiple roles (Kilavik et al. 2013; Spitzer and  
53 Haegens 2017; Schmidt et al. 2019; Barone and Rossiter 2021).

54 Most studies have treated the broad beta frequency range (~13-35Hz) as one common motor  
55 cortical rhythm, possibly rendering the association of specific beta rhythm modulations to specific  
56 components of sensorimotor behavior difficult. A few studies divided this broad band into low beta  
57 (below 20Hz) and high beta (above 20Hz). In a published dataset (Kilavik et al. 2012; Confais et al.  
58 2020) we observed concurrent and distinct low and high beta bands during visuomotor behavior in  
59 macaque motor cortical local field potentials (LFP). However, the low and high bands modulated  
60 similarly in power and peak frequency in that behavioral task. Also Stoll et al. (2015) observed two  
61 distinct low and high beta bands in macaque frontal cortical electrocorticography (ECoG), in a trial-  
62 and-error task, comprising search and repetition phases. They found only the high band to be  
63 systematically sensitive to attentional effort and cognitive control. Chandrasekaran et al. (2019)  
64 correlated behavioral reaction time (RT) with dorsal premotor cortex (PMd) beta power, in a visual  
65 RT-task. In the pre-stimulus period, they found positive correlations for frequencies below 20Hz and  
66 negative correlations for frequencies above 20Hz. However, their data only contained a single beta  
67 band peaking at 25Hz, which shifted slightly towards higher peak frequency for shorter RT. In

68 comparison, Zhang et al. (2008) found positive correlations with RT for sensorimotor pre-stimulus  
69 alpha/beta power across a broad frequency range of 8-33Hz in a visual RT task.

70 These studies remain far from conclusive in determining potentially distinct correlations between  
71 behavior and motor cortical low and high beta bands. We therefore designed a new visuomotor  
72 behavioral task to maximize at the same time spatio-temporal attention and the required motor  
73 control, with the aim to disentangle which of the different task variables, and task-instructed and  
74 uninstructed (spontaneous) behavioral factors (Musall et al. 2019; Tremblay et al. 2022 bioRxiv)  
75 affect the two beta bands. We hypothesized that low beta might be related to dynamic postural  
76 control and movement preparation. This band was shown to be more affected in human Parkinson's  
77 disease patients than high beta (Kühn et al. 2009; Neumann et al. 2016), and was also more  
78 attenuated by deep-brain stimulation in the subthalamic nucleus (Lopez-Azcarate et al. 2010) and by  
79 levodopa administration (Priori et al. 2004), that both improve motor performance in the patients. In  
80 contrast, motor cortical high beta might be more closely associated with attentional, decisional or  
81 working memory processes (Stoll et al. 2015; Lundqvist et al. 2016; Haegens et al. 2017), and located  
82 anterior to low beta (Vezoli et al. 2021). Consistent with these predictions, in two macaques we  
83 found low beta to be dominant in primary motor cortex (M1) and correlate positively with behavioral  
84 RT. Low beta also correlated negatively with spontaneous hand postural micro-movements that were  
85 frequent during the maintenance of stable central hold during delays. High beta, on the other hand,  
86 was dominant in PMd, and was unrelated to RT and hand micro-movements. It modulated selectively  
87 in anticipation of and during the processing of visual cues. This modulation was enhanced by focal  
88 overt attention, when the animal oriented the gaze towards the work area.

89



## 90        **RESULTS**

91        We studied LFP low and high beta band rhythms recorded in the motor cortex (M1 and PMd) of  
92        two macaque monkeys engaged in a complex visuomotor reaching task. We determined the motor  
93        cortical regions in which each band dominated, and we quantified their relationship to task  
94        conditions and performance, and to spontaneous hand and eye movements.

95

### 96        **Behavioral task performance and uninstructed hand and eye movements**

97        Two macaque monkeys performed a rule-based and predictive visual cue selection task, requiring  
98        arm reaching responses after a GO signal, in one of 4 (diagonal) directions from a common center  
99        position. The monkeys did many errors related to selecting the wrong visual cue or by not  
100        maintaining central hand position through the delays. They also performed spontaneous hand and  
101        eye movements that were aligned to task events.

102        We analyzed the behavior in 59 sessions obtained in 53 recording days in monkey T and 39  
103        sessions in 34 days in monkey M, from which electrophysiological data was also analyzed. The  
104        visuomotor task was complex, requiring the animal to select the valid spatial cue (SC; one out of  
105        three sequentially presented SCs; the other two were distractors) that matched in color with a  
106        preceding color selection (SEL) cue (Fig. 1B). The animal then had to prepare a center-out arm  
107        reaching movement to the memorized matching SC position, to be executed after a GO signal.  
108        Throughout the sequence of presentation of the different visual cues, the animal had to maintain  
109        central hand position with the manipulandum, but was free to explore the visual scene with the eyes.

110        In trials initiated by the monkey, the maintenance of central hand position on the small central  
111        fixation spot was often lost before the GO signal (41.9 % of initiated trials for monkey T and 37.8 %  
112        for monkey M). A majority of breaks of hand fixation happened early in the trial, before SEL cue  
113        onset (24.8% and 15.9% of the initiated trials in monkey T and M, respectively). The remaining hand  
114        fixation breaks were distributed across the remaining delays between SEL and GO (only 3-6% of the  
115        initiated trials in each delay). This abundance of aborted trials due to hand fixation breaks

116 demonstrate the difficulty of initial stabilization and maintenance of the hand manipulandum within  
117 the 0.6cm diameter fixation zone in the manual space.

118 Several types of errors were also made in trials not aborted before the GO signal was presented  
119 (*GO trials*). Of these, errors caused by too long reaction or movement times were not very frequent  
120 (1.3% and 7.4 % of all GO trials in monkey T, 4.4% and 2.2% in monkey M, respectively). Directional  
121 errors due to selecting a peripheral position not cued by any of the two distractors were also rare  
122 (1.7% of all GO trials in monkey T, 3.0 % in monkey M).

123 Directional errors towards a distractor direction (*distractor errors*) were much more frequent,  
124 accounting for 17.4% of all GO trials in monkey T and 22.3% in monkey M. These distractor errors  
125 occurred less frequently for the pink color condition (SC3 valid; Fig. 1B) in both monkeys ( $p < 0.01$  for  
126 both monkeys; multiple comparison chi-squared test using Matlab function `crosstab`; Suppl. Table 1).  
127 The distractor errors furthermore varied slightly across the four movement directions for both  
128 animals, with somewhat less errors for movements towards the body (i.e. lower visual field) than  
129 away from the body (i.e. upper visual field) ( $\chi^2 = 28.6$ ,  $p < 0.01$  for monkey T,  $\chi^2 = 8.5$ ,  $p = 0.036$  for  
130 monkey M; suppl. Table 1).

131 The RT (time between GO and reach movement onset) was calculated offline from the hand  
132 trajectories (see Methods). We analyzed variability in RT across the recorded sessions, color  
133 conditions and movement directions for each monkey, using 3-way ANOVAs. All three factors  
134 significantly affected RT in a similar manner in the two animals ( $p < 0.01$ ; Suppl. Table 1). First, there  
135 was a significant main effect of session, but with no systematic trend with increasing or decreasing  
136 RT from early to late sessions. Furthermore, RT varied significantly across the three conditions, with  
137 shorter RT in the pink color condition. Finally, RT varied slightly across the four movement directions,  
138 with slightly shorter RT for movements towards than away from the body. Averaged RT was only 6-  
139 23ms longer in monkey M than in monkey T.

140 Both animals made spontaneous (uninstructed) movements during the behavioral trial (see  
141 Musall et al. 2019; Tremblay et al. 2022 bioRxiv). This included hand micro-movements during the

142 maintenance of central position, with the hand position remaining within the central fixation spot  
143 (Fig. 1C), and eye gaze shifts (saccades) to and from the work area (computer monitor), and to  
144 explore the elements of the visual scene within the work area (Fig. 1D-F). Although uninstructed,  
145 these hand and eye movements were remarkably similar in the two animals, and aligned to task  
146 events.

147 The hand micro-movements during central position maintenance were quantified by velocity. The  
148 average hand velocity decreased as the hand stabilized inside the central fixation spot at the start of  
149 the trial, and was minimal before the onset of the valid SC. After the presentation of the valid SC,  
150 hand velocity increased, and therefore differed significantly in the three conditions (Fig. 1C and  
151 Suppl. Fig. 1A-B and D). These micro-movements did not reflect a drift of the hand position in the  
152 (diagonal) direction of the upcoming center-out reaching movement (Suppl. Fig. 1C), unlike the  
153 spatial attention effects described for eye fixational microsaccades (Hafed and Clark 2002). Instead,  
154 the hand prevalently drifted along one of the two main axes defined by the 2D manipulandum,  
155 having lower frictional resistance. Control electromyographic (EMG) recordings from the deltoid  
156 muscle revealed increased muscular tone during the preparatory period following the valid SC onset  
157 (Suppl. Fig. 1E). This increase tone was similar for preparation of movements towards and away from  
158 the body, thus also not displaying any directionality, in contrast to the strong selectivity of this  
159 muscle during the center-out reach execution. Thus, the hand micro-movements during movement  
160 preparation were at least partly caused by increased muscle tone of arm muscles involved in the  
161 following reaching movement.

162 The monkeys frequently made saccadic eye movements to explore the items of the visual scene,  
163 or to shift the gaze towards or away from the work area (Fig. 1D-F). On average, the probability to  
164 perform a saccade (in the direction of the cue) increased transiently after each visual cue, in a  
165 condition-selective manner, with more frequent gaze shifts towards the location of the valid SC than  
166 the invalid SC (distractor; Fig. 1E-F). The gaze was often directed out of the work area of the visual  
167 scene, and more so for monkey M than monkey T, but in both animals less frequently around the

168 time of the valid SC and as the GO signal approached. Each trial lasted longer than 6 seconds, and the  
169 visual scene had salient cues presented for 300ms each, so that their color and location could most  
170 likely also be detected with peripheral vision (*covert* attention), triggering a saccade towards the cue,  
171 not requiring constant *focal* or *overt* attention with the gaze constantly directed within the visual  
172 scene. Finally, both monkeys restricted eyeblinks to the delays, and more so after having fixated the  
173 valid SC, thus under tight temporal attentional control, as also shown in humans engaged in  
174 demanding working memory tasks (Ortega et al. 2022).

175 To summarize, the behavioral task performance was very similar for the two animals. Both  
176 animals had faster RT and less distractor errors for the pink color condition and for movement  
177 directions towards the body. Also spontaneous hand micro-movements and eye gaze shifts were  
178 aligned to task events in a remarkably similar manner in both animals.

179

#### 180 **Concurrent low beta in M1 and high beta in PMd**

181 Both monkeys had two bands in the beta frequency range, one peaking below and the other  
182 above 20Hz in motor cortex. Low beta (<20Hz) was dominant in M1 and high beta (>20Hz) was  
183 dominant in PMd.

184 LFP activity from 110 individual sites in monkey T and 60 sites in monkey M, across M1 and PMd  
185 was analyzed. Spectrograms for an example session with three simultaneously recorded LFP sites  
186 (Fig. 2A-C) showed a high beta band (> 20Hz) predominant in the most anterior site (PMd; site 1), and  
187 a low beta band (<20Hz) predominant in the most posterior site (M1; site 3). Both bands were  
188 distinguishable in the intermediate site (site 2). Even if the trial-averaged spectrograms showed  
189 increased beta band power across long periods of the task, single-trial LFPs showed bursts of high  
190 beta in PMd (Fig. 2D) and low beta in M1 (Fig. 2F) of variable durations and timing across trials, as  
191 already described (e.g. Murthy and Fetz 1996; Donoghue et al. 1998; Feingold et al. 2015; Confais et  
192 al. 2020).

193 Average spectrograms across all trials and LFP sites for each monkey (Fig. 2E) confirmed the  
194 presence of a low and a high beta band in both animals, with the low band peaking at 15-16Hz, and  
195 the high band at 25-26Hz (Fig. 3A). We computed a *beta band dominance index* (see Methods) in the  
196 pre-SC1 epoch, as both bands were present in this epoch in the single site examples and in the  
197 average spectrograms for both monkeys (Fig. 3B). A majority of sites had a dominant low beta band  
198 (positive indices), but in both animals a substantial fraction of sites had a significant high beta band  
199 dominance. Overlaying the beta band dominance index on the cortical surface reconstruction within  
200 the recording chamber, a gradient across the cortical surface was found in both animals, with the  
201 high band predominant in the most anterior recording sites (PMd), and the low band predominant in  
202 the posterior sites (M1) and in the intermediate sites (Fig. 3C). There was a significant (negative)  
203 correlation between band dominance index and antero-posterior (or PMd-M1) gradient within the  
204 recording chamber for both animals ( $p < 0.01$ ; Spearman's rank order correlation). To confirm local  
205 origin of these LFP beta rhythms, we analyzed phase-locking of the simultaneously recorded neurons  
206 to the locally dominant beta band, for neurons and LFPs recorded on the same linear array. For the  
207 low beta band dominant sites, 11.2% of neurons (25/311 neurons in monkey T and 37/241 in monkey  
208 M) were significantly phase-locked to low beta phase. For the high beta band dominant sites, 51.1%  
209 of neurons (13/24 neurons in monkey T and 34/68 in monkey M) were significantly phase-locked to  
210 high beta phase. The average spectrograms, plotted separately according to beta band dominance,  
211 are remarkably similar in the two animals, with very distinct modulations for each band (Fig. 3D),  
212 which we further detail below.

213 In summary, low and high beta peak frequencies (Fig. 3A), the beta band dominance across the  
214 cortical surface (Fig. 3C) and task-related modulations of each band (Fig. 3D) were similar in the two  
215 animals. Also task performance (Suppl. Table 1) and spontaneous hand and eye movements (Fig. 1C-  
216 F) were similar in the two monkeys. From hereon we therefore collapsed the data for the two  
217 animals. In particular, we combined all individual trials from all LFP sites with the same beta band  
218 dominance, such that each LFP site was assigned to either contribute its trials to the low band or the

219 high band. The normalized, single-trial instantaneous beta amplitude was calculated (based on the  
220 Hilbert transform) for each band. We then adopted a Linear Model (LM) approach to determine  
221 which of the complementary task-related and spontaneous behavioral factors explained trial-by-trial  
222 amplitude variability in the two beta bands.

223

224 **Low and high beta amplitude correlated differently with task-related and spontaneous behavior**  
225 **in single trials**

226 The trial-averaged amplitude of the low band increased gradually after trial start and was maximal  
227 in the waiting period after SEL up to the valid SC. It then dropped following the valid SC and remained  
228 low through the remainder of the trial (Fig. 4B). The trial-averaged amplitude of the high band was  
229 strong through most trial epochs, right from the trial start. The amplitude decreased temporarily  
230 before and during the SCs. Both bands dropped to minimum amplitude during movement execution  
231 after GO.

232 Task-related and spontaneous behavioral variables were considered as regressors to explain the  
233 beta amplitude modulations. The task-related variables encompassed the color condition, the  
234 direction of the upcoming movement and the RT (monkeys had to initiate their movement rapidly).  
235 The spontaneous (uninstructed) variables included hand micro-movement velocity, eye velocity and  
236 gaze position. We also included a regressor representing the amount of time elapsed in the recording  
237 session (“time-on-task”; Stoll et al. 2015). The comparisons of the 247 models (combinations of 7  
238 regressors and their 2-by-2 interactions) revealed that the winnings model, with the lowest Bayesian  
239 Information Criterion (BIC) in each 10ms bin along the trial, were mainly composed of a single or a  
240 combination of several non-interacting regressors (Fig. 4A). Interaction terms were present in the  
241 winning models in 37/1360 bins (there were 680 bins for each band) and were mainly interactions  
242 between the time-on-task and the eye gaze position (28/37 bins). The direction of the upcoming  
243 movement was almost always absent in the winning model except after the GO signal, around the

244 time of movement onset (and only for the low band). Consequently, 6 linear models, each including  
245 one relevant regressor, were fitted separately for the high and low beta bands.

246 First, we found that the color condition explained trial-by-trial variability of both beta bands (Fig.  
247 4B, bottom). High beta band was modulated by the condition from the onset of SEL, and strongest  
248 around the spatial cues. The low beta band was modulated only from the onset of SC1. The condition  
249 had no effect before the onset of SEL, excluding any general effect of blocking of conditions on the  
250 beta activity.

251 This strong condition selectivity of both bands prompted us to also explore their modulations  
252 during the many distractor error trials. Indeed, when the monkey wrongly performed a reach  
253 towards one of the distractors, low and high beta amplitude profiles along the trial reflected the  
254 distractor selected by the animal (Suppl. Fig. 4A). In a decoding analysis, we trained a random forest  
255 estimator to decode color condition based on beta amplitude profiles in correct trials. We first tested  
256 the decoder on other correct trials, and for both the high and the low beta bands, the decoding was  
257 well beyond chance level (Suppl. Fig. 4B), but strongest for the low band. The decoder trained on  
258 correct trials could also decode the attended distractor in error trials (Suppl. Fig 4C) with the  
259 decoding performance again better for the low band, but also above chance level for the blue and  
260 pink conditions for the high band. The decoder was well below chance level in decoding the missed  
261 (valid) SC in distractor error trials (Suppl. Fig 4C). These decoding results confirmed that both low and  
262 high beta band amplitude modulations reflected the behavioral choices made by the animal, whether  
263 correct or wrong.

264 We next considered the normalized behavioral RT, as a measure of the level of reach movement  
265 preparation in individual trials. RT was strongly positively correlated with the low band amplitude,  
266 while almost no bin was significant for the high band (Fig. 5B). The correlation started immediately  
267 after the valid SC onset, and lasted up to the GO signal, however weaker for the blue color condition  
268 in the final delay before GO. Thus, from the onset of the cue that instructed the future movement,  
269 low beta amplitude was smaller in trials with shorter RT.

270 We then also considered the spontaneous eye and hand movements. First, the instantaneous eye  
271 velocity was poorly correlated with the high and low beta band amplitude (Fig. 4B, middle). Hand  
272 velocity, however, strongly explained the trial-by-trial variability of beta amplitude, but almost  
273 exclusively for the low beta band (Fig 4B, top). Low beta and hand micro-movement velocity  
274 correlated negatively during a majority of the trial and maximally after the onset of SC1 and the  
275 onset of SC2. The correlation was reduced in the final delay between SC3 and GO, in particular in the  
276 pink color condition. In order to understand the nature of this strong relationship between low beta  
277 amplitude and hand micro-movement velocity during the stable maintenance of central hold, we  
278 performed a covariance analysis (Fig. 5A). This analysis confirmed the strong negative correlation  
279 between hand velocity and low beta amplitude. It furthermore showed that the strongest correlation  
280 prior to valid SC onset was for beta *lagging* hand by about 100-130ms. After the valid SC onset, when  
281 low beta amplitude dropped (Fig. 4B), and subsequently hand velocity increased (Fig. 1C), the  
282 covariance analysis showed a widening in the cross-correlation, with maximal negative correlation  
283 for 260-270ms in the direction of beta *leading* hand.

284 The strong correlations with both RT and hand micro-movement velocity for low beta amplitude  
285 prompted us to explore whether hand micro-movements were directly predictive of RT. We  
286 correlated hand velocity with RT across all trials in all sessions, in 10ms bins along the trial. However,  
287 this correlation was weak and only rarely significant prior to the GO signal (Suppl. Fig. 5).

288 After observing that eye velocity did not explain beta amplitude variability, we explored to which  
289 degree gaze direction modulated beta amplitude. Both monkeys spent a considerable fraction of  
290 each trial with the gaze directed away (Out) from the work area (Fig. 1E-F), possibly reflecting  
291 moments with less focal attention on the task. We quantified the correlation between gaze position  
292 (In/Out of the work area) and high and low beta amplitude at various lags. A lag with gaze *leading*  
293 beta by 230ms resulted in the largest number of correlated bins for both bands (Suppl. Fig. 6B). At  
294 this lag, the high beta band amplitude was strongly modulated by gaze position in particular in the  
295 trial epochs preceding the valid SC onset, and again just before the GO signal. In moments with gaze



296 In, high beta amplitude was higher, in particular during the delays. The temporary decrease in  
297 amplitude at the valid SC had similar amplitude for gaze In/Out. Thus, the rhythmic modulation in  
298 high beta amplitude by the rhythmic task event was largely abolished when considering only time-  
299 points with gaze Out. Considering gaze position at zero lag, or a lag in the opposite direction (as beta  
300 leading gaze) largely abolished the strong high band amplitude modulations due to gaze position  
301 (Suppl. Fig. 6A). Gaze position also influenced low beta band amplitude (Fig. 6A). However, the effect  
302 was variable, with some bins having larger amplitude for gaze In, and others for gaze Out of the work  
303 area (Fig. 6B). The most consistent effect across the three color conditions was a delay in the drop of  
304 beta after the valid SC onset for gaze Out, and increased amplitude prior to GO for gaze In. We  
305 further explored the effect of delayed low beta amplitude drop after the valid SC for the gaze Out  
306 position. We split trials according to gaze position at exactly 200ms after the valid SC onset, and  
307 plotted low beta amplitude for all trials with gaze either on the target (valid SC), inside the work area  
308 but not on the target, or outside of the work area (Suppl. Fig 6C). This confirmed that the decrease in  
309 beta amplitude mainly occurred for trials with gaze In (on the target or otherwise inside the work  
310 area), compared to trials with the gaze still Out.

311 Finally, for both beta bands, amplitude increased systematically within the behavioral session  
312 (time-on-task). For the high band, the amplitude increase for late trials was particularly strong during  
313 SEL, and in the delay immediately preceding the valid SC, but also in other task epochs. For the low  
314 band, amplitude increased significantly within the session in most trial epochs, both before and after  
315 the valid SC onset. A supplementary spectral parametrization analysis (Donoghue et al. 2020)  
316 confirmed that this increase was specific to the two beta bands and not caused by a change in the  
317 overall level or the slope of the aperiodic signal, which remained unchanged (Suppl. Fig. 7).

318

319        **DISCUSSION**

320        We here describe a double-dissociation in sources and behavioral correlates of motor cortical low  
321 and high beta, with respect to both task-instructed and spontaneous behavior. In two macaques  
322 performing a delayed visuomotor reaching task, low beta dominated in M1, while high beta  
323 dominated in PMd. Low beta correlated positively with RT during preparation and negatively with  
324 uninstructed hand postural micro-movements throughout the trial. In contrast, high beta was  
325 unrelated to RT and hand postural dynamics, and instead was selectively modulated in anticipation  
326 of and during visual cues, thus reflecting temporal predictions. However, this modulation was largely  
327 abolished when the gaze was oriented away from the work area. These clear-cut differences  
328 reconcile the many disparate roles proposed for the broader beta rhythm (~13-35Hz), and designate  
329 specific roles in movement control for M1 low beta and spatio-temporal attention for PMd high beta.

330

331        **Behavioral task performance and spontaneous movements**

332        The monkeys performed a rule-based and predictive visual cue selection task entailing strong  
333 working memory components, first for selecting the valid spatial cue (target) based on a color  
334 matching rule, and second to memorize the target position while preparing the reach. Both monkeys  
335 had increased performance for the condition in which the last of the three sequentially presented  
336 cues was valid. This might be because this cue was closer in time to the GO signal, requiring working  
337 memory for target location for a shorter duration. However, it could be that visual distractors  
338 occurring during movement preparation and while the target location was kept in working memory  
339 were more distracting in the two other conditions. Monkey M, who had the largest increase in  
340 performance when the third spatial cue was the valid one also gazed more towards the cue  
341 indicating the valid color (SEL) in that condition (Fig. 1F). Thus, there was possibly a behavioral bias in  
342 in favor of this (easier) condition from the trial start.

343        Both monkeys performed uninstructed (spontaneous) hand and eye movements that were  
344 aligned to the task events. Such spontaneous movements persist even in highly constrained settings

345 (Tremblay et al. 2022). Our monkeys were head-fixed, but free to move their eyes. Furthermore, they  
346 had to maintain their hand position within a very limited zone through most of the trial. Yet, they  
347 frequently made micro-movements with the hand, in particular during movement preparation. These  
348 spontaneous movements did not have any directional bias reflecting the planned movement, but  
349 possibly resulted from increased postural muscle tonus during movement preparation (Suppl. Fig. 1E)  
350 being imperfectly balanced across different muscles. As we discuss below, the neuronal activity was  
351 correlated with these spontaneous hand and eye movements to a similar degree as with the task-  
352 instructed behavior.

353

#### 354 **Low beta dominates in M1 and high beta dominates in PMd**

355 We found low beta to dominate in M1, while high beta dominated in PMd. Rather than a gradual  
356 shift in peak frequency of a single beta band along the posterior-anterior axis, we observed two  
357 distinct bands also at intermediate sites. Most studies of sensorimotor beta rhythms in monkeys  
358 lumped frequencies from ~13-35Hz, such that any gradient across cortex might have been  
359 overlooked. However, consistent with our result, Chandrasekaran et al. (2019) found beta peak  
360 frequency in PMd to be above 20Hz, whereas near the central sulcus (including M1 and  
361 somatosensory areas) beta was mainly observed to peak at or below 20Hz (Rouguel et al. 1979;  
362 Courtemanche and Lamarre 2005; Witham and Baker 2007; Witham et al. 2007; Haegens et al. 2011;  
363 Zanos et al. 2018; but see also Baker et al. 1999, Peles et al. 2020). Several studies of beta rhythms in  
364 monkey prefrontal cortex reported peak frequencies above 20Hz (e.g. Buschman and Miller 2007;  
365 Buschman et al. 2012; Lundqvist et al. 2016; Haegens et al. 2017; Rassi et al. 2022). Furthermore,  
366 Vezoli et al. (2021) found high beta to be dominant anterior to low beta across the fronto-parietal  
367 cortex in macaque ECoG, while Mahjoory et al. 2020 reported a gradual increase in beta peak  
368 frequency along the posterior-anterior axis in human resting state magnetoencephalography. It is  
369 therefore probable that the low and high beta bands that we here characterize across motor cortex  
370 extend well beyond, and at the cortical level reflect a low beta network including M1, somatosensory

371 and parietal regions and a high beta network including PMd and prefrontal regions, not excluding the  
372 involvement of also sub-cortical structures (e.g. Courtemanche et al. 2003; Courtemanche and  
373 Lamarre 2005; Feingold et al. 2015).

374 We analyzed single-trial continuous beta amplitude variations, rather than signals binarized into  
375 epochs with and without bursts using an arbitrary threshold. This facilitated the use of a Linear  
376 Model (LM) framework to correlate beta amplitude to the task and behavioral factors at the single  
377 trial level, in a time-resolved manner. The two beta bands modulated very differently in relation to  
378 the predictable temporal structure of each trial. The amplitude in the low band split for the three  
379 color conditions only after the onset of SC1, in a 'reactive' manner which could reflect movement  
380 preparation. In comparison, the amplitude of the high band was already selective after the onset of  
381 SEL, in anticipation of the SCs. The condition selectivity found with the LM analysis was supported in  
382 a decoding analysis. The decoder trained on correct trials could also decode (above chance level) the  
383 spatial cue that was used by the animal in distractor error trials. Thus, the beta amplitude  
384 modulations reflected the actually attended cue, and not the cue that should have been attended.

385

### 386 **Low beta reflects movement preparation and continuous postural dynamics**

387 A decrease in sensorimotor beta amplitude during preparation, as we found for low beta, was  
388 already observed in many studies (Kilavik et al. 2013). The selective decrease in amplitude of the low  
389 band following the valid spatial cue, the moment-to-moment negative correlation with spontaneous  
390 hand micro-movements and the positive trial-by-trial correlation with behavioral RT during the  
391 preparatory period are strong evidences in favor of a role for beta in postural control and movement  
392 preparation (Salmelin et al. 1995; Conway et al. 1995; Baker et al. 1999; Brown 2000; Engel and Fries  
393 2010; Jenkinson and Brown 2011; Perfetti et al. 2011 ; Pastotter et al. 2012 ; Khanna and Carmena  
394 2017; Chandrasekaran et al. 2019 ; Peles et al. 2020). Specifically, this concerns the low beta band  
395 dominating in M1. In contrast, the amplitude of the high beta band in PMd was independent of hand  
396 micro-movements and behavioral RT, and did not remain low during movement preparation. The

397 correlation between low beta and RT (Fig. 5B) started several seconds before the GO signal, as also  
398 observed for motor cortical visual evoked potentials (Kilavik et al. 2010). The correlation can even be  
399 present before stimulus onset in visual RT tasks (e.g. Zhang et al. 2008; Buschman et al. 2012;  
400 Chandrasekaran et al. 2019). Thus, visual cue processing in early stages of preparation is important  
401 for optimizing movement performance. We found no correlation between low beta amplitude and  
402 RT before the onset of the valid spatial cue. RT variability was therefore most likely related to  
403 variability in movement preparation processes, and not to general arousal.

404 A recent study reported transient beta bursts even during sustained isometric gripping in humans  
405 (Echeverria-Altuna et al. 2022), suggesting no direct moment to moment link between cortical beta  
406 amplitude and motor output. The postural micro-movements we observed were a 100-fold smaller in  
407 velocity than the center-out reach responses (Suppl. Fig 1A), yet strongly correlated with low beta  
408 amplitude across all trial epochs. The discrepancy between our findings and theirs could be due to  
409 the large number of trials available for our analysis from collapsing all LFP sites, or possibly to less  
410 sensitivity in their setup for detecting minute changes in grip force during the sustained isometric  
411 contraction.

412 The negative correlation between low beta and hand velocity was maximal at temporal lags of  
413 100-130ms (beta *lagging* hand) prior to the valid cue onset (Fig. 5). In comparison, directed  
414 descending and ascending coherence in the beta frequency range between cortex and muscle  
415 (Witham et al. 2010, 2011) were reported to have much shorter phase delays than this, on the order  
416 of 25ms. Jasper and Penfield (1949) already speculated whether the emergence of sensorimotor beta  
417 bursts reflected entering a state of neuronal population dynamics equilibrium, with beta being a  
418 network resonance frequency (see also Jensen et al. 2005; Rosanova et al. 2009; Lundqvist et al.  
419 2020; Mahjoory et al. 2020; Chota et al. 2023). A decrease in M1 low beta amplitude, in response to  
420 hand postural micro-movements could reflect a temporary shift away from equilibrium with the aim  
421 to stop further displacement of the hand cursor outside the central fixation spot, which would have  
422 aborted the trial. However, beta lagged the hand also at trial start, when residual hand movements

423 related to the placement of the hand cursor within the central fixation spot were still prevalent.  
424 Thus, these low beta amplitude modulations could also reflect some form of post (micro-)movement  
425 beta rebound.

426 During movement preparation the average low beta amplitude started to decrease a few  
427 hundreds ms before the average hand velocity started to increase. The trial-by-trial cross-correlation  
428 showed that in this trial epoch low beta amplitude and hand velocity correlated negatively across a  
429 broad range of lags, with maximal correlation strength for beta *leading* the hand of about 260-  
430 270ms. This could reflect the average difference in onset of the changes in these two signals in  
431 response to the valid cue. Tremblay et al. (2022) showed that uninstructed movements could be  
432 informative about task-related behavior. However, in our case, the hand micro-movements did not  
433 predict behavioral RT, which also correlated strongly with low beta amplitude during movement  
434 preparation. In conclusion, low beta reflects multiple components of motor control simultaneously,  
435 that between them are largely independent.

436

#### 437 **High beta reflects temporal task prediction and focal attention**

438 Rhythmic modulations in average beta amplitude in frontal cortex were observed in several  
439 studies using rhythmic visuomotor or working memory tasks (Saleh et al. 2010 ; Lundqvist et al. 2016)  
440 or passive auditory tasks (Fujioka et al. 2012) permitting temporal predictions. Furthermore, beta  
441 amplitude scaled to predictable delay durations (Kilavik et al. 2014; Sun et al. 2021). We found that  
442 temporal prediction and attention only affected the high beta band dominant in PMd. Notably, high  
443 beta amplitude was already strong at trial start (central touch), and modulated selectively after SEL,  
444 which indicated the color to be attended. Thus, whereas the selectivity in the low band only emerged  
445 during movement preparation, the high band was selective in anticipation of the spatial cue.

446 Neither of the two beta bands modulated in amplitude in relation to eye velocity, which is not  
447 surprising since we recorded in regions coding for upper limb movements. However, the high band  
448 was strongly modulated by gaze direction (In/Out of the work area) in particular prior to the

449 presentation of the valid cue (Fig. 6). The overall amplitude of high beta and the rhythmic modulation  
450 around visual cues were much stronger when considering the time points in each trial with the gaze  
451 directed towards the work area. The effect was maximal when the gaze position was considered  
452 about 230ms in the past, with respect to the high beta amplitude (Suppl. Fig. 6). Thus, gaze position  
453 conditioned future high beta amplitude. We interpret this in relation to spontaneous switches  
454 between covert attention (gaze Out) vs. overt or focal attention (gaze In). Trial start and GO were  
455 more than 6s apart, which is very long for maintaining focal overt attention. Having the gaze out of  
456 the work area, which was more frequent before the valid cue presentation (Fig. 1E-F), probably  
457 reflected less focal attention on the visual scene. This decreased the rhythmic modulations in high  
458 beta amplitude and notably the maxima during the delays prior to the valid cue onset. The temporal  
459 predictability of the task events permitted shifting the gaze to the work area in anticipation of or  
460 triggered by salient visual events, in particular the valid cue. This probably explains why the  
461 performance was correct even with periods in the trial being performed with peripheral vision and  
462 less focal attention. Having the gaze Out affected low beta amplitude notably by delaying the  
463 decrease in amplitude following the valid cue. Thus, less focal attention on the visual scene possibly  
464 delayed the onset of movement preparation.

465 The rhythmic modulation we observed in high beta amplitude resembled strongly the one  
466 reported by Lundqvist et al. (2016) for prefrontal cortex (PFC) during a working memory task  
467 requiring central eye fixation. We verified that the high beta band recorded in the PMd sites was  
468 locally generated by assessing locking of local neuronal spiking to beta phase. It is however likely that  
469 the high beta band is generated in a larger network also including the PFC. The similarity of the high  
470 beta band modulations in the two studies suggests that reflections of (rhythmic) temporal  
471 predictions of visual cues are prevalent in moments of increased focal overt attention. Combined,  
472 this supports a role for PMd high beta in sensorimotor spatio-temporal prediction and attention (e.g.  
473 Murthy and Fetz 1992, 1996; Sanes and Donoghue 1993; Rubino et al. 2006; Androulidakis et al.

474 2006; Lalo et al. 2007; Saleh et al. 2010; Fujioka et al. 2012; Kilavik et al. 2014; Wiener et al. 2018;  
475 Sun et al. 2021).

476

#### 477 **Time-on-task effects on low and high beta**

478 High beta in frontal cortex was shown to increase in amplitude from early to late within  
479 behavioral sessions, possibly reflecting increased attentional effort or fatigue (Stoll et al. 2015). We  
480 therefore included the time spent on the task as a regressor in the LM analysis. It affected strongly  
481 the amplitude of both bands (Fig. 7), but not the aperiodic signal component. For the low beta band,  
482 the time-on-task effect was present across all trial epochs. For the high band the effect was  
483 particularly strong during the SEL cue presentation, and in a condition selective manner in the delay  
484 immediately preceding each valid cue. This could suggest that late in the session, there was overall  
485 increased postural control as reflected by increased low beta amplitude, but also increased focal  
486 attention in anticipation of and during to the most relevant visual cues (SEL and valid SC), as reflected  
487 by the high beta modulations.

488

#### 489 **Conclusion**

490 Beta oscillations in sensorimotor cortex remain enigmatic, almost 75 years after the first  
491 descriptions and interpretations were offered by Jasper and Penfield (1949). We proposed more than  
492 10 years ago that by considering small, yet systematic frequency changes within a broader beta band,  
493 more insight can be gained regarding trial-by-trial and epoch specific correlates of sensorimotor beta  
494 band rhythms (Kilavik et al. 2012). Since then, the analysis of time-resolved beta amplitude at the  
495 single trial level, also by quantifying different parameters of individual bursts has become the gold  
496 standard, holding the promise to considerably advance our understanding of sensorimotor beta (Zich  
497 et al. 2020). By designing a demanding visuomotor task, and by monitoring task-related, and also  
498 spontaneous behavior, we here describe a double-dissociation in cortical sources and behavioral  
499 correlates of low and high beta in motor cortex. These clear-cut findings reconcile the largely  
500 disparate roles proposed for sensorimotor beta, ranging from, on the one extreme, movement



501 inhibition, and on the other extreme, temporal expectation (reviewed in Kilavik et al. 2013). Only by  
502 acknowledging that motor cortex contains multiple beta rhythms, each with specific behavioral and  
503 cognitive correlates, can we advance towards a complete understanding. In this perspective, our  
504 study is an important step forward.  
505

## 506 **MATERIALS AND METHODS**

### 507 **Animal preparation**

508 Two adult male Rhesus monkeys (T and M, 10 and 14 kg, respectively) participated in this study.  
509 Care and treatment of the animals during all stages of the experiments conformed to the European  
510 and French Government Regulations (2010/63/EU; authorization identifier 03383.02). Previously  
511 published studies using data from these two monkeys (Kilavik et al. 2010, 2012, 2014; Ponce-Alvarez  
512 et al. 2010; Confais et al. 2012, 2020) were based on recordings from the opposite hemisphere  
513 during performance of another visuomotor task.

514 Subsequent to learning the visuomotor task (see below) the monkeys were prepared for multi-  
515 electrode recordings in the left hemisphere of the motor cortex (M1 and PMd), contra-lateral to the  
516 trained arm. In a first surgery, prior to completed task learning, a titanium head-post was implanted  
517 posteriorly on the skull, fixated with titanium bone screws and bone cement. In a second surgery,  
518 several months later, a cylindrical titanium recording chamber (19mm inner diameter) was  
519 implanted. The positioning of the chamber above upper-limb regions of M1 and PMd was confirmed  
520 with T1-weighted MRI scans (prior to surgery in both animals, and also post-mortem in monkey M),  
521 and with intra-cortical electrical micro-stimulation (ICMS; as described in Asanuma and Rosen 1972)  
522 performed at the end of single-tip electrode recording days in the first recording weeks, in both  
523 monkeys (Fig. 3C). The recording sites included in this study spanned about 15mm across the cortical  
524 surface in the anterior-posterior axis, and only include sites determined with ICMS to be related to  
525 upper limb movements. The exact border between PMd or M1 areas was not estimated.

526

### 527 **Behavioral setup and task**

528 Two monkeys were trained to perform a visuomotor rule-based and predictive cue-selection task  
529 (Fig. 1B). The task required arm-reaching responses after a GO signal, in one of 4 (diagonal)  
530 directions from a common center position, performed by holding a handle that was freely movable in  
531 the two-dimensional horizontal plane. The visual scene was displayed on a vertical computer

532 monitor (LCD; 75 Hz) in front of the monkey (Fig. 1A). We here describe the monitor stimuli in cm  
533 units, but since the viewing distance was about 57 cm, this approximates to the same degrees of  
534 visual angle. Before the start of each trial, the monitor displayed the handle (hand cursor) position  
535 (small white square; 0.4cm edges), a central fixation spot (yellow flickering disc; 0.45cm radius), and  
536 the 4 possible peripheral target positions (red circular outlines; 1.5cm radius at 9 cm diagonal  
537 distances from the center). The position of the cursor was updated on the monitor every 40ms  
538 (~every 3<sup>rd</sup> frame), but only if the accumulated displacement from the previous update exceeded  
539 0.1cm (to avoid flickering position due to electronic noise).

540 The monkey initiated the trial by positioning the cursor inside the central hand fixation spot. This  
541 central touch ended the flickering of the fixation spot (which remained on), and was accompanied by  
542 an auditory tone, presented for 50ms. After holding this central position for 1000ms, a selection cue  
543 (SEL) indicating the color rule for that trial appeared on the screen for 300ms, displayed behind but  
544 extending well beyond the central yellow disc and the overlying hand cursor. SEL consisted in one out  
545 of three differently colored polygons (blue, green or pink; ~3cm radius) defining the trial type. A  
546 1000ms delay followed SEL offset. Thereafter, three peripheral spatial cues (SC1-3) were presented  
547 in sequence, each displayed for 300ms, with 1000ms delay after each of them. The SCs were colored  
548 discs (0.9cm radius), always presented in the temporal order blue-green-pink, each within one of the  
549 4 peripheral red outlines.

550 All 4 diagonal target positions were equally likely for each SC. Thus, successive SC in the same trial  
551 could be presented in the same position. This resulted in 192 unique conditions, combining the 3 trial  
552 types (color rule) with the 4 independent positions for SC1, SC2 and SC3. In monkey T, who was not  
553 willing to work for as many trials as monkey M, only 3 of the 4 target positions were used in each  
554 session (randomly selected for each session), in order to reduce somewhat the number of unique  
555 conditions. For both animals, in order to ease the task, the three trial types (i.e. color rule) were  
556 presented separately in small blocks of approximately 15 unique conditions per block, cycling across  
557 multiple blocks of the three trial types to complete all the unique conditions. The unique conditions

558 within each block were presented in pseudo-random order. Incorrect trials within a block were re-  
559 presented later in the same block, and each block was completed only when all unique conditions in  
560 the block were correctly executed.

561 The animal had to select the (valid) SC according to the color rule indicated by SEL (i.e. delayed  
562 color match to sample), and ignore the two (distractor) SCs of different colors. The GO signal was  
563 presented after the final 1000ms delay following SC3, prompting the animal to execute the center-  
564 out arm reaching movement to the memorized target position indicated by the valid SC. The GO  
565 signal was directionally non-informative, consisting in the simultaneous onset of 4 red light-emitting  
566 diodes (LEDs; embedded in a thin Plexiglas plate in front of the monitor) at the centers of the 4  
567 circular target outlines. The reaction time (RT) and movement times each had a maximum allowance  
568 of 500ms. The animal was trained to stop and 'hold' within the correct peripheral target outline for  
569 300ms to obtain a reward. The moment of onset of valid target touch was signaled by an auditory  
570 tone (50ms) and a completed hold with another tone (50ms). Reward was delivered 500ms after  
571 completed hold, and consisted in a small drop of liquid (water or diluted fruit juice). Monkey T was  
572 not rewarded for non-hold trials, while monkey M was given a smaller reward on non-hold trials (on  
573 the valid target; 500ms after breaking hold). For both animals, these non-hold trials were included in  
574 the analysis (about 10% of all included trials).

575 The manual work area of the monkey was scaled down with respect to the display on the monitor  
576 (by a factor of about 0.7). Thus, the diagonal distance (center to center) between the fixation spot  
577 and peripheral targets was 6.5cm. The required central fixation zone was defined to be within a  
578 radius of 0.3cm, and the accepted touch zone of the peripheral targets had a radius of 1cm. These  
579 touch zones corresponded to the hand cursor overlapping more than halfway with the fixation spot  
580 or the peripheral outlines, respectively. In the offline analysis of the hand signal, we used the spatial  
581 scaling of the visual scene on the computer monitor.

582 In short, in this rule-based and predictive cue-selection task, the timing and sequential order of  
583 the three SCs were predictable, and SC validity was indicated at the start of each trial by SEL. Only  
584 the spatial positions of the three SCs were unpredictable.

585

#### 586 **Data acquisition**

587 During recording days (maximally 5 days a week), a multi-electrode, computer-controlled  
588 microdrive (MT-EPS, Alpha Omega, Nazareth Illith, Israel) was attached to the recording chamber and  
589 used to transdurally insert up to five single-tip microelectrodes (typical impedance 0.3-1.2M $\Omega$  at  
590 1,000Hz; FHC) or up to two linear microelectrode arrays (either V- or S-probes, Plexon, Dallas, TX,  
591 USA or LMA, Alpha Omega; each with 24 or 32 contacts, inter-contact spacing either 100, 150 or  
592 200 $\mu$ m; 12.5 or 15 $\mu$ m micrometer contact diameters) into motor cortex. In this study we employ the  
593 term 'site' for the recording obtained from each individual single-tip electrode (or from each linear  
594 array) recorded in individual behavioral sessions. The electrodes (or arrays) were positioned and  
595 lowered independently within the chamber (Flex-MT drive; Alpha Omega) in each session. Individual  
596 guide-tubes for each electrode/array were used that did not penetrate the dura (no guide was used  
597 for the more rigid LMA array). For single-tip electrodes, the reference was common to all electrodes  
598 and connected, together with the ground, on a metal screw on the saline-filled titanium recording  
599 chamber. For the linear array recordings, the reference was specific to each array type. For the LMA  
600 (Alpha Omega) it was an insulated wire exposed at the tip, either emerged in the chamber saline, or  
601 attached with crocodile clip to the probe stainless steel tube (which in turn was lowered into the  
602 chamber liquid, but not extending into brain tissue). For the V- and S-probes (Plexon) in most cases  
603 the references was the stainless steel shaft of the array (extending into brain tissue, in near proximity  
604 to the probe's recording contacts). In a few sessions, the references was instead placed on a skull-  
605 screw on the more posterior headpost (7/41 sites using v-probes in monkey T) or on a screw on the  
606 saline-filled recording chamber (1/51 sites using s-probes in monkey M). For both array types, the

607 ground was either connected to a skull-screw of the remote titanium head-fixation post, or to a  
608 screw of the titanium recording chamber.

609 We used two different data acquisition (DAQ) systems to record neuronal and behavioral data. All  
610 single-tip electrode recordings in monkey T were obtained on a recording platform with components  
611 commercialized by Alpha Omega. This system included the Alpha-Map system for online monitoring  
612 of signals (running on Windows XP), and the MCP-Plus multi-channel signal processor including  
613 analog head-stages. Neuronal signals from each electrode were amplified with a gain of 5,000 to  
614 10,000 (with unit-gain head-stage), hardware filtered (1Hz – 10kHz) and digitized and saved for  
615 offline analysis at a sampling rate of 32 kHz.

616 All linear array recordings in monkey T, and all recordings (single electrodes and linear arrays) in  
617 monkey M, were obtained on a recording platform with components commercialized by Blackrock  
618 Neurotech (Salt Lake City, UT, USA). This system included Cereplex M digital head-stages (versions PN  
619 6956, PN 9360 and PN 10129) connected to a Digital Hub (versions PN 6973, PN 6973 DEV 16-021, PN  
620 10480) via custom HDMI cables (versions PN 8083, PN 8068), which transmitted signals via fiber  
621 optics to a 128 channel Neural Signal Processor (NSP hardware version 1.0), and control software  
622 Cerebus Central Suite (v6.03 and v6.05 for monkeys T and M, respectively; running on Windows 7).  
623 An adapter (PN 9038) permitted connecting multiple single-tip electrodes to the Cereplex M  
624 Omnetics connector (Monkey M). Neuronal signals were hardware filtered (0.3Hz – 7.5 kHz) and  
625 digitized and saved for offline analysis at a sampling rate of 30 kHz.

626 Behavioral event codes (TTL, 8 bits) were transmitted online to the DAQ system from the VCortex  
627 software (version 2.2 running on Win XP; NIMH, <http://dally.nimh.nih.gov>), which was used to  
628 control the behavioral task. A custom rebuild of the VCortex software allowed simultaneous online  
629 monitoring of hand and eye gaze positions in the common reference frame of the animal's visual  
630 monitor display. Continuous hand position (X and Y) was obtained from two perpendicularly  
631 superimposed contactless linear position magnetorestrictive transducers, model MK4 A; GEFRAN,  
632 Provaglio d'Iseo, Italy). The 'floating' magnetic cursor was attached to a manipulandum that could be

633 moved along two pairs of rails with ball bearings, each pair aligned with one of the two transducers.  
634 The Y-oriented rails were fixed on top of the X-oriented rails. As such, this system provided  
635 somewhat less frictional resistance in the Y direction than in the X direction. Furthermore, either of  
636 the uni-directional X or Y displacements provided somewhat less frictional resistance than their  
637 combination needed to move to the diagonally placed targets. Hand position was used online to  
638 control the behavioral task. The hand position was also saved by VCortex for offline analysis (at  
639 250Hz sampling rate). In a majority of sessions, eye gaze position (X and Y) was recorded by the DAQ  
640 system (video based infrared eye-tracking; RK-716PCI (PAL version) at 50Hz for the first single-tip  
641 electrode recordings in monkey T, or ETL-200 at 240Hz sampling rate for the array recordings in  
642 monkey T and all recordings in monkey M; ISCAN Inc., Woburn, MA, USA). The eye-tracking camera  
643 was positioned next to the lower right corner of the monkey's computer monitor.

644 In many sessions we also recorded heart rate (plethysmographic pulse waveform from ear-clip  
645 pulse oximeter, model 8600V; Nonin Medical Inc, Plymouth, MN, USA), and in some sessions surface  
646 electromyogram (EMG) from one or two proximal upper limb muscles (deltoid/biceps).

647

#### 648 **Hand position analysis**

649 All analyses of behavioral and neuronal data were conducted offline by using Matlab (The  
650 MathWorks, Inc.).

651 The hand position signals that were recorded with VCortex were realigned in time with the other  
652 data recorded by the DAQ system offline, by realigning the behavioral event codes and up-sampled  
653 (linear interpolation) from 250Hz to 1kHz. The hand position signals were calibrated (scaled) online in  
654 the VCortex configuration to match the visual display before storing on file, and in analysis we used  
655 the spatial scaling of the visual scene in cm.

656 The RTs for the center-out reaching movements were redefined offline using the hand  
657 trajectories. First, hand velocity and acceleration were computed in each trial, using a Savitsky-Golay  
658 algorithm. To determine reach movement onset, in a 2000ms duration epoch centered on GO,

659 periods with prolonged increased velocity (>50ms) above an empirically determined velocity-  
660 threshold (6 cm/s) were then detected, and the final, preceding increase in acceleration above an  
661 empirically determined acceleration-threshold (6 cm/s/s) was then taken as the time of movement  
662 onset. These RTs were confirmed in both animals by visual inspection of single trial trajectories in  
663 several sessions.

664 We also quantified hand micro-movements during the maintenance of stable central hand  
665 position using hand velocity and position.

666

### 667 **Eye position offline calibration and analysis**

668 In a majority of sessions we recorded eye position with an infrared camera. A rough online  
669 calibration of the gain and offset of the eye X and Y signals were done during the first behavioral  
670 trials in each recording session, to compensate for small changes in head fixation or camera position  
671 compared to the previous day/session. This simplified online calibration was adopted to avoid  
672 training the monkey in a fixation task. The center of gaze was set to zero (center) while the monkey  
673 looked at the small yellow central target in order to place the hand cursor therein to initiate a new  
674 trial. Then, on some days the X or Y gain was updated slightly so that the spontaneous eye fixations  
675 on the peripheral target outlines matched their position in the Cortex software interface. The trials  
676 before calibration (typically 0-3 correct trials) were excluded in offline analysis involving eye  
677 movements.

678 For data analysis, the eye signals recorded with the DAQ system were re-calibrated offline, to  
679 correct for the distortion induced by having the camera off the horizontal and vertical central axes of  
680 gaze. First, the raw eye signals were inspected visually to exclude from offline calibration and analysis  
681 the trials that were recorded before the completion of the rough online calibration, typically  
682 consisting in suppressing the 0-3 first correct trials in each session. Raw data were downsampled  
683 from the acquisition sampling frequency (1 or 30 kHz) to the camera sampling frequency (50 or  
684 240Hz) and linearly rescaled from bits to volts. We computed the eye velocity in volts/s using the



685 Savitzky-Golay algorithm. For the offline calibration algorithm, we only considered data points that  
686 likely belong to fixation periods (i.e. whose velocity was lower than the lower 10th percentile of the  
687 total velocity distribution). At this stage, the superimposition of eye positions during these slow  
688 velocity epochs across all trials in a session already showed an expected clustering of the data around  
689 5 positions on the screen whose geometry resembled the center and 4 peripheral target positions  
690 used in the task. Thus, we were able to define boundaries in the voltage space to separate data  
691 points according to whether they were recorded when the monkey was looking within the work area  
692 (approximate boundaries of computer monitor) or when he was looking away from the work area  
693 (e.g looking in the ceiling, or signal saturation due to eye blinks). The slow velocity (fixation) data  
694 occurring within the work area was then sorted into 5 clusters using a k-means algorithm (kmeans  
695 function in MatLab, using squared Euclidean distance). Cluster centers were assumed to represent  
696 the target positions in the voltage space. We next generated a 2D non-linear model to compensate  
697 for the distortion due to camera position, between target coordinates on the screen (in cm) and  
698 voltage amplitudes of the corresponding centroids. This was achieved by adjusting a polynomial  
699 function to fit the relationship between each coordinate in the screen space to the XY coordinates in  
700 the voltage space. The correction was then applied to the complete eye traces. A detailed version of  
701 this correction can be found in DeHaan et al. (2018). Each data point was re-assigned to a cluster if it  
702 was located at a distance  $< 2\text{cm}$  from the target's center coordinates, or assigned as being between  
703 clusters (but within the work area), or outside of the work area (incl. saturated). Eye position,  
704 velocity and acceleration were then saved for further analysis, scaled in cm of the visual display,  
705 alongside cluster membership of each data point. Furthermore, the data points outside the work  
706 area that were beyond the lower or upper 0.99 percentiles of the boundaries of the raw X and Y  
707 voltage signals were marked as 'saturated'.

708 To detect the saccadic eye movements, we applied a recursive algorithm that seeks for the largest  
709 breakpoint in a piecewise stationary process, in a trial-by-trial fashion. First we computed the  
710 cumulative 2D velocity of the eye signal in cm/s. This representation yields a pseudo staircase profile

711 alternating between steep and slowly increasing periods over time. We extracted the highest decile  
712 of the velocity distribution and marked the corresponding steps in the staircase as boundaries to  
713 define periods when the subject was looking coarsely in the same area. These steps corresponded to  
714 blinks or to obvious large saccades and the steady periods were either fixation periods or multiple  
715 fixation periods with intermittent smaller saccades. During the steady periods, the cumulative  
716 distribution showed a slow increase due to noise originating from micro-movements and the  
717 recording device. The contribution of this noise being dependent on the location of the fixation on  
718 the screen, we compensated for it by subtracting the average slope for each period separately. This  
719 gave a piecewise stationary process that showed pseudo-horizontal steady epochs with better signal  
720 to noise ratio for the intermittent smaller saccades. Secondly, we applied a recursive algorithm to  
721 this process consisting, within a given time window, to compute at each data point the difference  
722 between the prior and the posterior average values. The maximum difference was extracted and  
723 compared to a threshold value computed after the velocity profile of a reference saccade (10ms  
724 duration, 60cm/s velocity peak). If the maximum difference was larger than the threshold, it was  
725 considered an actual transition and the time window was split in two at this timepoint. Starting with  
726 a time window covering the whole trial, the algorithm defined new (smaller and smaller) time  
727 windows at each iteration and the new window boundaries were considered as transitions. To avoid  
728 transitions to be detected multiple times, we introduced a 'refractory period' of +/-15ms around  
729 accepted transitions. Fixation periods were finally defined by sorting the transitions between  
730 fixations into detected saccades or detected micro-saccades depending whether or not the euclidian  
731 distance between the isobarycenter of two successive fixations was larger than a threshold (the  
732 change in eye position on the screen for an eye movement of 0.5cm). Saccade onset/offset times  
733 were saved for further offline analyses alongside the other calibrated eye signals detailed above.

734 Finally, eyeblinks were detected as two subsequent (<150ms apart) eye signal velocity passings  
735 beyond a velocity threshold (500cm/s for the 50Hz sessions and 800cm/s for the 240Hz sessions).  
736 The data points in a window including the gap between these subsequent threshold passings, as well

737 as a couple of preceding and subsequent flanker datapoints were marked as eyeblinks. Visual  
738 inspection confirmed that this method was able to distinguish between saccades and abrupt velocity  
739 increases due to eyeblinks, even if large standalone saccades sometimes had velocities beyond the  
740 thresholds used for eyeblink detection.

741

#### 742 **LFP spectral analysis and beta amplitude extraction**

743 All sessions with sufficient quality of data were included in analysis. The raw signals were low-pass  
744 filtered offline at 250Hz cut-off frequency (zero-phase 4<sup>th</sup> order Butterworth filter, using the butter  
745 and filtfilt functions in Matlab) to obtain the LFP signal, which was then downsampled to 1KHz and  
746 saved for further analysis. For this study, we included only one contact for each of the linear array  
747 penetrations, selected to be well within cortex and with low noise (e.g. no heartbeat artifacts). LFP  
748 activity from 110 individual sites (63 with single-tip electrodes and 47 with linear arrays) in 59  
749 sessions monkey T and 60 sites in 39 sessions (10 with single-tip electrodes and 50 with linear arrays)  
750 in monkey M were included in the analysis. A site is here defined as the conjunction of a specific  
751 chamber coordinate of the electrode entry and cortical depth, in one recording session. In the  
752 included LFP sites, trials with obvious artifacts (mainly due to teeth grinding, static electricity or  
753 heart-beat signal) detected by visual inspection, were excluded from further analysis (12.3% of all  
754 trials in monkey T and 5.1% in monkey M). As the duration for which the monkeys were willing to  
755 work varied across sessions, after trial exclusion, the analyzed sites included on average 96.4 +/- 48.8  
756 (STD) trials (range 19-184) in monkey T, and 147.3 +/- 80.3 trials (range 18-281) in monkey M. We  
757 included also the sites with few trials, since a majority of the neuronal data analyses were done on  
758 trials grouped across many sites.

759 Power spectral density (power for short) estimates of the LFP were obtained using the pwelch  
760 function of Matlab. For LFP spectrogram examples (Fig. 2A-C), we first highpass filtered the LFP with  
761 3Hz cutoff, using a 4th order Butterworth filter. Power was estimated for single-trial sliding windows  
762 of 300ms duration, with 50ms shifts, at 1Hz resolution, before averaging across trials.

763 For average spectrograms for each monkey (Figs. 2E and 3D), we also used 300ms sliding  
764 windows, 50ms shifts, at 1Hz resolution. For each individual LFP, we first highpass filtered the signal  
765 (3Hz cutoff, 4th order Butterworth filter), before calculating the power for each window in single  
766 trials. Next, the power matrix (trial x window x frequency) for each LFP was normalized by dividing by  
767 the mean power between 10-40Hz across trials and windows for that LFP. We then computed for  
768 each window the grand average power across all individual trials for all normalized LFPs (i.e. each  
769 trial contributed equally to the grand mean, independent on the total number of trials for the  
770 specific LFP site). For single site and average spectrograms we used a perceptually flat color-map  
771 (Cramer 2018), with color limits set to the minimum and maximum power values between 12-40Hz  
772 between onset of SEL and GO, separately for each site or each monkey.

773 To determine the peak frequencies of the two observed beta bands, we estimated power in a  
774 900ms epoch preceding SC1 onset, across all trials for each LFP site (after initial highpass filtering at  
775 3Hz ; 4th order Butterworth filter). Within this epoch, we used five 500ms windows, with overlap of  
776 400ms, to get one average power estimate per trial. Before plotting the grand average spectral  
777 power (Fig. 3A), we normalized the PSD matrix (trial x frequency) for each LFP by dividing by the  
778 mean power across trials between 10-40Hz for that LFP. We also determined, for each individual  
779 trial, the frequency between 10 and 40Hz with maximal power, to plot the distributions of (beta)  
780 peak frequencies across all trials and LFP sites for each monkey (Fig. 3A). Based on these  
781 distributions, for both monkeys a frequency range for the low band of 13-19Hz and for the high band  
782 of 23-29Hz were used to determine the dominant beta band for each LFP site. We computed a beta  
783 band dominance index using mean power across all trials and frequencies in the low band minus  
784 mean power across all trials and frequencies in the high band, divided by the sum of the two.  
785 Significance in band dominance was determined with a paired t-test across trials, taking the mean  
786 power across all frequencies in each band for each trial (Fig 3C).

787 To separate the aperiodic and periodic components of the signal (Suppl. Fig. 7), for each monkey  
788 we performed spectral parametrization with the FOOOF method (Donoghue et al. 2020) in the pre-

789 SC1 period in blue trials. We split trials according to whether they were performed early or late  
790 within a session. Trials were labeled as ‘early’ when belonging to the first third of each session and  
791 ‘late’ when belonging to the final third. The aperiodic component was fitted with a frequency range  
792 of 5-194Hz, using the ‘knee’ mode.

793

#### 794 **Phase-locking of neuronal spiking to LFP beta phase**

795 To verify that the LFP beta oscillations were at least partially of local origin, we analyzed phase-  
796 locking of the simultaneously recorded neurons to the LFP beta phase of the site-dominant band. We  
797 included only the laminar recording sites, and tested phase locking for neurons across all laminar  
798 contacts to the LFP on the selected LFP contact on the same laminar probe, to ensure proximity of  
799 the two signals. We analyzed the pre-SC1 delay, since the beta amplitude was generally strong in  
800 both animals and in both bands in this delay. Only neurons with more than 100 spikes in this delay,  
801 accumulated across all trials, were included. Beta phase was extracted from the Hilbert  
802 transformation of the beta-filtered LFP, only for the dominant beta band at each LFP site, and the  
803 phase at each spike time was determined.

804 To quantify the phase locking, we first used Rayleigh’s test of non-uniformity of circular data  
805 (CircStat Matlab toolbox; Berens 2009). To determine whether the locking was significant for  
806 individual neurons, a trial-shuffling method was used. Trial-shuffling is an efficient method for  
807 obtaining a ‘baseline’ measure of phase locking, destroying the direct temporal relationship between  
808 the two signals, while preserving their individual properties such as rhythmicity. 1000 repetitions of  
809 the phase-locking analysis (Rayleigh’s test) was done while randomly combining beta phases and  
810 spike times from different trials. If the original data yielded a larger z-statistic value from the  
811 Rayleigh’s test than 950/1000 (equivalent to  $p < 0.05$ ) of the trial-shuffled controls, the phase-locking  
812 of the neuron was considered significant.

813

## 814 **LM and cross-correlation analysis to link the two beta bands to behavioral regressors**

### 815 *Dataset preprocessing*

816 Given the similarity in the behavioral and neuronal data from the two animals up to this point, for  
817 all subsequent analyses we combined LFPs for both monkeys, while splitting low and high band  
818 dominant sites. We furthermore continued the analyses using the single-trial instantaneous beta  
819 amplitude. For each LFP site, we first bandpass filtered the signal to extract the dominant beta band,  
820 either 16+/-4Hz for low dominant sites or 26+/-5Hz for high dominant sites, using 8th order  
821 Butterworth filters. We next calculated the instantaneous amplitude (envelope) of the beta filtered  
822 LFP time series by constructing the analytic signal using the Hilbert transform. The LFP was then cut  
823 in trials, before normalizing the beta amplitude by subtracting the grand mean amplitude and  
824 dividing by the grand amplitude standard deviation. After normalization, individual trials for all LFP  
825 sites with the same beta band dominance were lumped to construct large matrices (trials x time) for  
826 each of the two beta bands, combining data from the two monkeys (Fig. 4B).

827 The eye signals (position and velocity) were upsampled to 1KHz, to have the same temporal  
828 resolution as the LFP and hand signals. The eye velocity was upsampled using a linear interpolation  
829 whereas the position of the gaze in the different clusters of the work area was upsampled using the  
830 nearest neighbor interpolation.

### 831 *Bayesian Index Criterion*

832 To evaluate the relation between complementary continuous and categorical variables with the  
833 LFP signal, we performed a Linear Model (LM) analysis. The LFP from both low and high beta bands  
834 were the variables to explain. The regressors considered to explain the data were 7 : color conditions  
835 (3 levels), movement direction (correct target location, 4 levels), reaction time (normalized with a z-  
836 score inside each recording session), trial number (relative position of the trial within the recording  
837 session), hand velocity (cm/s), eye velocity (cm/s) and the gaze position of the animal (inside vs  
838 outside the work area, 2 levels) and all 2-by-2 interactions. More complex interactions were excluded  
839 from the model to simplify the interpretation of the results and reduce the number of potential

840 regressors. We considered a total of 6800 ms, from -1200ms to 5600ms from the SEL for the analysis.  
841 All the neuronal and behavioral data were then binned in 10ms non-overlapping windows. In each  
842 bin we applied a total of 247 models (all combinations of 1 to 7 regressors including or not their 2-by-  
843 2 interactions) and compared them using a Bayesian Index Criterion (BIC). The BIC is sensitive to the  
844 number of trials considered in each model fitting. Consequently, we applied the same selection for  
845 each model, removing from all bins the trials in which the eye or the hand signals were missing, and  
846 furthermore removing trials in individual bins if the eye signal was saturated because of an eyeblink  
847 or an extreme eye position outside the dynamic range of the eye camera. We then examined the  
848 presence or not of a regressor and or interactions in the winning model in each of the 680 bins. This  
849 first analysis allowed us to target the regressors explaining the most trial-by-trial variability of high  
850 and low beta amplitude (Fig. 4A).

#### 851 *Linear Model Analysis*

852 Based on the BIC analysis, 6 regressors, without interactions, were selected. Movement direction  
853 and all the possible pair-wise interactions were discarded because they were rarely represented in  
854 the regressors explaining the most the beta. The trial selection was different for each selected  
855 regressor, based on available trials for each regressor. All trials could be used color condition, RT and  
856 time-on-task (trial number) regressors. Good quality of the hand signal was necessary for the hand  
857 velocity regressor. Good quality of the eye signal was necessary for the gaze position and eye velocity  
858 regressors. For both eye gaze and velocity In both cases the eyeblinks were considered as outliers  
859 and the corresponding single-trial bins with an eyeblink were removed for the model fitting. For the  
860 analysis of the eye velocity, the remaining bins with out-of-range signal saturation in which the eye  
861 signal was saturated were furthermore removed. The different number of trials available considered  
862 for each been and each regressor prompted led us to consider each regressor separately. For each  
863 bin, each regressor and each beta band, we applied a regression model (*fitlm*) to describe the  
864 relationship between beta amplitude and the 6 different predictors. Considering that some variables

865 were categorical, we applied an ANOVA to the model objects to test the significance of the  
866 categorical variables. P-values <0.01 were considered significant.

#### 867 *Covariances matrix between hand velocity and low beta amplitude*

868 An analysis equivalent to the joint peristimulus time histogram representation of the covariance  
869 between two neurons (Aertsen et al. 1989, Nougaret and Genovesio 2018) was applied using the  
870 hand velocity and the low beta amplitude as input signals. The mean of the variance of the trial-by-  
871 trial cross product was computed using the FieldTrip toolbox (Oostenveld et al. 2011) to obtain the  
872 *raw* covariance matrix. Then, the trials were shuffled for one variable and the same matrix was  
873 obtained, the *shuffled* covariance matrix. This procedure was performed 100 times to obtain a  
874 distribution of 100 *shuffled* covariance matrices. The corrected covariance matrix was obtained by  
875 subtracting the mean of the 100 *shuffled* covariance matrices from the *raw* covariance matrix and to  
876 divide this *subtracted* matrix by the square root of the cross product of the time-dependent variance  
877 of the *raw* matrix. The scale of the *subtracted* covariance matrix is thereby bounded between -1 and  
878 1 and named correlation coefficients. At each point in the covariance matrix, a correlation was  
879 considered significant if the value in that point in of the *raw* covariance matrix (before correction)  
880 was always superior or always inferior to the 100 values from the *shuffle* matrices in the same point  
881 (Fig. 5A left). The data along the diagonal of the subtracted covariance matrix was averaged to obtain  
882 a lag versus correlation coefficient plot (Fig. 5A right). The lag with the largest negative  
883 value (anticorrelation) was determined in the trial period prior to and after valid SC onset.

884

#### 885 **Decoding task condition with beta amplitude**

886 We built two classifiers using high and low beta bands separately. For each, the features were  
887 extracted from the temporal evolution of beta amplitude in single trials. We calculated the average  
888 beta amplitude in 50ms non-overlapping time bins from touch to GO in each trial. A random forest  
889 estimator was trained with the default parameters from the scikit-learn library (Pedregosa et al.  
890 2011). Correct trials were split in a 60-40% ratio between train and test set, respectively. The model



891 predicted the color of SEL based on the time courses of beta amplitude. To ensure stability of the  
892 method, we repeated the procedure using 20 different data splits, always with class balance in the  
893 train set. The average performance for each of the classes was computed by averaging across  
894 repetitions. After training the classifier in the correct trials, the same model was used to predict  
895 incorrect trials. In this case, we predicted either the color of the attended (distractor) SC, or the color  
896 of SEL; i.e., the SC the monkey actually used, or the SC the monkey should have used. The chance  
897 level was calculated by shuffling the labels in 100 train-test splits of the data for both high and low  
898 beta classifiers. All the accuracy values estimated in the different shuffle test-sets were below 0.37,  
899 which we set as the overall chance level for the results.

900        **FUNDING**

901        This work was supported by funding from the H2020-MSCA-ITN grant *In2PrimateBrains* (#956669)  
902 and the FLAG-ERA grant *PrimCorNet*, by ANR (ANR-19-HBPR-0005) to BEK.

903

904        **ACKNOWLEDGEMENTS**

905        The authors declare no competing financial interests. The authors wish to thank Joel Baurberg,  
906 Xavier Degiovanni and Luc Renaud for technical assistance, Sébastien Barniaud, Laurence Boes,  
907 Frédéric Charlin and Marc Martin for animal care.

908       **REFERENCES**

- 909       Androulidakis, AG, Doyle, LM, Gilbertson, TP, Brown, P. (2006) Corrective movements in response  
910 to displacements in visual feedback are more effective during periods of 13–35 Hz oscillatory  
911 synchrony in the human corticospinal system. *Eur J Neurosci* 24: 3299-3304.
- 912       Aertsen AM, Gerstein GL, Habib MK, Palm G (1989) Dynamics of neuronal firing correlation:  
913 modulation of ‘effective connectivity’. *J Neurophysiol* 61, 900–917.
- 914       Asanuma H, Rosén I. (1972) Topographical organization of cortical efferent zones projecting to  
915 distal forelimb muscles in the monkey. *Exp Brain Res* 14:243–256
- 916       Baker SN, Kilner JM, Pinches EM, Lemon RN (1999) The role of synchrony and oscillation in the  
917 motor output. *Exp Brain Res* 128:109–117.
- 918       Barone J, Rossiter HE (2021) Understanding the Role of Sensorimotor Beta Oscillations. *Front*  
919 *Syst Neurosci* 15:655886.
- 920       Berens P (2009) CircStat: A Matlab Toolbox for Circular Statistics. *J Stat Soft* 31:1-21.
- 921       Brown P (2000) Cortical drives to human muscle: the Piper and related rhythms. *Progress in*  
922 *neurobiology* 60(1):97-108.
- 923       Buschman TJ, Denovellis EL, Diogo C, Bullock D, Miller EK (2012) Synchronous oscillatory neural  
924 ensembles for rules in the prefrontal cortex. *Neuron* 76:838–846.
- 925       Buschman TJ, Miller EK (2007) Top-down versus bottom-up control of attention in the prefrontal  
926 and posterior parietal cortices. *Science* 315:1860-1862.
- 927       Chandrasekaran C, Bray IE, Shenoy KV (2019) Frequency shifts and depth dependence of  
928 premotor beta band activity during perceptual decision making. *J Neurosci* 39:1420 –1435.
- 929       Chota S, VanRullen R, Gulbinaite R (2023) Random Tactile Noise Stimulation Reveals Beta-  
930 Rhythmic Impulse Response Function of the Somatosensory System. *J Neurosci* 16:JN-RM-1758-22.
- 931       Confais J, Kilavik BE, Ponce-Alvarez A, Riehle A (2012) On the anticipatory precue activity in motor  
932 cortex. *J Neurosci* 32:15359–15368.
- 933       Confais J, Malfait N, Brochier T, Riehle A, Kilavik BE (2020) Is there an intrinsic relationship  
934 between LFP beta oscillation amplitude and firing rate of individual neurons in macaque motor  
935 cortex? *Cerebral Cortex Communications* 1(1):tgaa017.
- 936       Conway BA, et al. (1995) Synchronization between motor cortex and spinal motoneuronal pool  
937 during the performance of a maintained motor task in man. *J Physiol* 489:917-924.
- 938       Courtemanche R, Fujii N, Graybiel AM (2003) Synchronous, focally modulated beta-band  
939 oscillations characterize local field potential activity in the striatum of awake behaving monkeys. *J*  
940 *Neurosci* 23:11741-11752.
- 941       Courtemanche R, Lamarre Y (2005) Local field potential oscillations in primate cerebellar cortex:  
942 synchronization with cerebral cortex during active and passive expectancy. *J Neurophysiol* 93:2039-  
943 2052.
- 944       Crameri, F (2021) Scientific colour maps (7.0.1). Zenodo. <https://doi.org/10.5281/zenodo.5501399>
- 945       de Haan MJ, Brochier T, Grün S, Riehle A, Barthélemy FV (2018) Real-time visuomotor behavior  
946 and electrophysiology recording setup for use with humans and monkeys. *J Neurophysiol* 120:539-52
- 947       Donoghue JP, Sanes JN, Hatsopoulos NG, Gaál G (1998) Neural discharge and local field potential  
948 oscillations in primate motor cortex during voluntary movements. *J Neurophysiol* 79(1):159-173.
- 949       Donoghue T, et al. (2020). Parameterizing neural power spectra into periodic and aperiodic  
950 components. *Nat Neurosci* 23(12):1655-1665.

- 951 Echeverria-Altuna I, et al. (2022) Transient beta activity and cortico-muscular connectivity during  
952 sustained motor behaviour. *Prog Neurobiol* 214:102281.
- 953 Engel AK, Fries P (2010) Beta-band oscillations – signalling the status quo?  
954 *Curr Opin Neurobiol* 20:156-165.
- 955 Feingold J, Gibson DJ, DePasquale B, Graybiel AM (2015) Bursts of beta oscillation differentiate  
956 postperformance activity in the striatum and motor cortex of monkeys performing movement tasks.  
957 *Proc Natl Acad Sci U S A* 112(44):13687-13692.
- 958 Fujioka T, Trainor LJ, Large EW, Ross B (2012) Internalized timing of isochronous sounds is  
959 represented in neuromagnetic Beta oscillations. *J Neurosci* 32:1791–1802.
- 960 Haegens S, et al. (2011) Beta Oscillations in the monkey sensorimotor network reflect  
961 somatosensory decision making. *Proc Natl Acad Sci USA* 108:10708-10713.
- 962 Hafed ZM, Clark JJ (2002) Microsaccades as an overt measure of covert attention shifts. *Vision Res*  
963 42(22):2533-2545.
- 964 Jasper H, Penfield W (1949) Electrocorticograms in man: effect of voluntary movement upon the  
965 electrical activity of the precentral gyrus. *Arch Psychiatr Zeitschr Neurol* 83:163-174.
- 966 Jenkinson N, Brown P (2011) New insights into the relationship between dopamine, beta  
967 oscillations and motor function. *Trends Neurosci* 34:611–618.
- 968 Jensen O, et al. (2005) On the human sensorimotor-cortex beta rhythm: sources and modeling.  
969 *NeuroImage* 26:347-355.
- 970 Kilavik BE, Confais J, Ponce-Alvarez A, Diesmann M, Riehle A (2010) Evoked potentials in motor  
971 cortical LFPs reflect task timing and behavioral performance. *J Neurophysiol* 104:2338-2351.
- 972 Kilavik BE, Confais J, Riehle A (2014) Signs of timing in motor cortex during movement preparation  
973 and cue anticipation. *Adv Exp Med Biol.* 829:121-142.
- 974 Kilavik BE, Confais J, Riehle A (2014) Signs of timing in motor cortex during movement preparation  
975 and cue anticipation. *Neurobiology of Interval Timing* 121-142.
- 976 Kilavik BE, Ponce-Alvarez A, Trachel R, Confais J, Takerkart S, Riehle A (2012) Context-related  
977 frequency modulations. *Cereb Cortex* 22(9):2148-2159.
- 978 Kilavik BE, Zaepffel M, Brovelli A, MacKay WA, Riehle A (2013) The ups and downs of beta  
979 oscillations in sensorimotor cortex. *Exp Neurol* 245:15-26.
- 980 Kühn AA, et al. (2009) Frequency-specific effects of stimulation of the subthalamic area in treated  
981 Parkinson's disease patients. *Neuroreport* 20(11):975-8.
- 982 Lalo E, et al. (2007) Phasic increases in cortical beta activity are associated with alterations in  
983 sensory processing in the human. *Exp Brain Res* 177(1):137-145.
- 984 López-Azcárate J, et al. (2010) Coupling between beta and high-frequency activity in the human  
985 subthalamic nucleus may be a pathophysiological mechanism in Parkinson's disease. *J Neurosci*  
986 30:6667– 6677.
- 987 Lundqvist M, Bastos AM, Miller EK (2020) Preservation and Changes in Oscillatory Dynamics  
988 across the Cortical Hierarchy. *J Cogn Neurosci* 32(10):2024-2035.
- 989 Lundqvist M, et al. (2016) Gamma and Beta Bursts Underlie Working Memory. *Neuron* 90:152-  
990 164.
- 991 Mahjoory K, Schoffelen JM, Keitel A, Gross J (2020) The frequency gradient of human resting-state  
992 brain oscillations follows cortical hierarchies. *Elife* 9:e53715.

- 993 Murthy VN, Fetz EE (1996) Synchronization of neurons during local field potential oscillations in  
994 sensorimotor cortex of awake monkeys. *J Neurophysiol* 76:3968-3982.
- 995 Murthy VN, Fetz EE. 1992. Coherent 25- to 35-Hz oscillations in the sensorimotor cortex of  
996 behaving monkeys. *Proc Natl Acad Sci USA* 89:5670-5674.
- 997 Musall S, Kaufman MT, Juavinett AL, Gluf S, Churchland AK (2019) Single-trial neural dynamics are  
998 dominated by richly varied movements. *Nat Neurosci* 22(10):1677-1686.
- 999 Neumann WJ, et al. (2016) Subthalamic synchronized oscillatory activity correlates with motor  
1000 impairment in patients with Parkinson's disease. *Mov Disord* 31(11):1748-1751.
- 1001 Nougaret S, Genovesio A (2018) Learning the meaning of new stimuli increases the cross-  
1002 correlated activity of prefrontal neurons. *Sci Rep*.8, 11680.
- 1003 Oostenveld R, Fries P, Maris E, Schoffelen J (2011) FieldTrip: Open Source Software for Advanced  
1004 Analysis of MEG, EEG, and Invasive Electrophysiological Data. *Comput. Intell. Neurosci.* 1–9.
- 1005 Ortega J, Plaska CR, Gomes BA, Ellmore TM (2022) Spontaneous Eye Blink Rate During the  
1006 Working Memory Delay Period Predicts Task Accuracy. *Front Psychol* 13:788231.
- 1007 Pastötter B, Berchtold F, Bäuml KHT (2011) Oscillatory correlates of controlled speed-accuracy  
1008 tradeoff in a response-conflict task. *Hum Brain Mapp* 33(8):1834-1849.
- 1009 Pedregosa et al. 2011. Scikit-learn: Machine Learning in Python, *JMLR* 12: 2825-30.
- 1010 Peles O, et al. (2020) Microstimulation Differentially Modulates Beta Oscillations and Affects  
1011 Behavior. *Cell Rep* 30(8):2555-2566.e3.
- 1012 Perfetti B, et al. (2011) Temporal evolution of oscillatory activity predicts performance in a choice-  
1013 reaction time reaching task. *J Neurophysiol* 105:18-27.
- 1014 Ponce-Alvarez A, Kilavik BE, Riehle A. (2010) Comparison of local measures of spike time  
1015 irregularity and relating variability to firing rate in motor cortical neurons. *J Comput Neurosci* 29:351-  
1016 365.
- 1017 Priori A, et al. (2004) Rhythm-specific pharmacological modulation of subthalamic activity in  
1018 Parkinson's disease. *Exp Neurol* 189(2):369-79.
- 1019 Rassi E, et al. (2022) Distinct beta frequencies reflect categorical decisions. *bioRxiv*  
1020 2022.10. 17.512497.
- 1021 Rosanova M, et al (2009) Natural frequencies of human corticothalamic circuits. *J Neurosci*  
1022 29(24):7679-85.
- 1023 Rougeul A, Bouyer JJ, Dedet L, Debray O (1979) Fast somato-parietal rhythms during combined  
1024 focal attention and immobility in baboon and squirrel monkey. *Electroencephalogr Clin Neurophysiol*  
1025 46:310-319.
- 1026 Rubino D, Robbins KA, Hatsopoulos NG (2006) Propagating waves mediate information transfer in  
1027 the motor cortex. *Nat Neurosci* 9(12):1549-57.
- 1028 Haegens S, Vergara J, Rossi-Pool R, Lemus L, Romo R (2017) Beta  
1029 oscillations reflect supramodal information during perceptual judgment. *PNAS* 114:13810-13815.
- 1030 Saleh M, Reimer J, Penn R, Ojakangas CL, Hatsopoulos NG (2010) Fast and slow oscillations in  
1031 human primary motor cortex predict oncoming behaviorally relevant cues. *Neuron* 65:461-471.
- 1032 Salmelin R, Hämäläinen M, Kajola M, Hari R (1995) Functional segregation of movement-related  
1033 rhythmic activity in the human brain. *Neuroimage* 2(4):237-243.
- 1034 Sanes JN, Donoghue JP (1993) Oscillations in local field potentials of the primate motor cortex  
1035 during voluntary movement. *Proc Natl Acad Sci USA* 90:4470-4474.

- 1036 Schmidt R, et al. (2019) Beta Oscillations in Working Memory, Executive Control of Movement and  
1037 Thought, and Sensorimotor Function. *J Neurosci* 39(42):8231-8238.
- 1038 Spitzer B, Haegens S (2017) Beyond the status quo: a role for beta oscillations in endogenous  
1039 content (re)activation. *eNeuro* 4(4):ENEURO.0170-17.2017.
- 1040 Stoll FM, et al (2016). The Effects of Cognitive Control and Time on Frontal Beta  
1041 Oscillations. *Cereb Cortex* 26(4):1715-1732.
- 1042 Sun H, et al (2019). Modulation of Beta Oscillations for Implicit Motor Timing in Primate  
1043 Sensorimotor Cortex during Movement Preparation. *Neurosci Bull* 35(5):826-840.
- 1044 Tremblay S, Testard C, DiTullio RW, Inchauspé J, Petrides M (2023) Neural cognitive signals during  
1045 spontaneous movements in the macaque. *Nat Neurosci* 26(2):295-305.
- 1046 Van Ede F, de Lange F, Jensen O, Maris E (2011) Orienting attention to an upcoming tactile event  
1047 involves a spatially and temporally specific modulation of sensorimotor alpha- and beta-band  
1048 oscillations. *J Neurosci* 31:2016–2024.
- 1049 Van Ede F, Jensen O, Maris E (2010) Tactile expectation modulates pre-stimulus beta-band  
1050 oscillations in human sensorimotor cortex. *NeuroImage* 51:867–876.
- 1051 Vezoli J, et al (2021). Brain rhythms define distinct interaction networks with differential  
1052 dependence on anatomy. *Neuron* 109(23):3862-3878.e5.
- 1053 Wiener M, Parikh A, Krakow A, Coslett HB (2018) An Intrinsic Role of Beta Oscillations in Memory  
1054 for Time Estimation. *Sci Rep* 8(1):7992.
- 1055 Witham CL, Baker SN (2007) Network oscillations and intrinsic spiking rhythmicity do not covary in  
1056 monkey sensorimotor areas. *J Physiol* 580(Pt.3):801-14.
- 1057 Witham CL, Riddle CN, Baker MR, Baker SN (2011) Contributions of descending and ascending  
1058 pathways to corticomuscular coherence in humans. *J Physiol* 589:3789-3800.
- 1059 Witham CL, Wang M, Baker SN (2007) Cells in somatosensory areas show synchrony with beta  
1060 oscillations in monkey motor cortex. *Eur J Neurosci* 26:2677-86.
- 1061 Witham CL, Wang M, Baker SN (2010) Corticomuscular coherence between motor cortex,  
1062 somatosensory areas and forearm muscles in the monkey. *Front Syst Neurosci* 4:38.
- 1063 Zanos S, Rembado I, Chen D, Fetz EE (2018) Phase-Locked Stimulation during Cortical Beta  
1064 Oscillations Produces Bidirectional Synaptic Plasticity in Awake Monkeys. *Curr Biol*. 28:2515-2526.e4.
- 1065 Zhang Y, Wang X, Bressler SL, Chen Y, DingM (2008) Prestimulus cortical activity is correlated with  
1066 speed of visuomotor processing. *J Cogn Neurosci* 20:1915–1925.

1067 **FIGURE LEGENDS**

1068

1069 **Figure 1. Experimental setup and task, spontaneous hand and eye movements.**

1070 A. The monkeys were seated in a primate chair, and performed center-out arm reaching  
1071 responses with a manipulandum in the horizontal plane for water or juice reward, with the visual  
1072 scene displayed on a vertical monitor. Eye position was recorded using an infrared camera.

1073 B. The monkeys performed a visuomotor rule-based and predictive cue-selection task. The trial  
1074 started when the monkey moved the hand cursor to the central fixation spot (touch). Next, a  
1075 selection cue (SEL) indicated the color to attend in that trial. Thereafter three spatial cues (SC) were  
1076 presented in sequence in fixed order (blue SC1 – green SC2 – pink SC3), each in one of the four  
1077 possible peripheral target positions. A directionally non-informative GO signal indicated to the  
1078 monkey to initiate the center-out reaching movement to the memorized valid target location. Each  
1079 delay lasted 1s and each visual cue lasted 300ms.

1080 C. Average hand velocity across all trials in all behavioral sessions in each monkey, zoomed in to  
1081 the micro-movements performed during the trial between central touch and the GO signal. In this  
1082 and subsequent figures, the blue, green and pink lines reflect data split according to the color  
1083 condition. Vertical dotted lines reflect onset/offset of visual task events.

1084 D. Average eye velocity in each monkey across all trials in all behavioral sessions with eye  
1085 movement recordings. Same conventions as in C.

1086 E. Gaze position in monkey T, across all behavioral sessions with eye movement recordings, in  
1087 blue (upper), green (middle) and pink (bottom) color conditions. Each plot show the total proportion  
1088 of trials with eye gaze on the Target SC (cyan), on one of the distractor SC (orange), on the central  
1089 fixation spot (yellow), between different visual items on the monitor (purple), outside the work area  
1090 (monitor; gray) or eyeblinks (black). Vertical lines reflect onset/offset of visual task events.

1091 F. Gaze position in Monkey M. Same conventions as in E.

1092

1093 **Figure 2. Example LFP sites and grand average spectrogram.**

1094 A-C. Spectrograms of three simultaneously recorded LFP sites from monkey T, including all correct  
1095 trials in one session, separated for the blue (top), green (middle) and pink (bottom) color conditions.  
1096 The locations of the three example LFP sites are marked with stars in Figure 3C, with site 1 the more  
1097 anterior and site 3 the more posterior. Frequency is on the vertical axis and task events are indicated  
1098 along the horizontal axis. Warmer colors indicate increased power (a.u.).

1099 D. Single trial examples of LFPs filtered broadly around the beta frequency range (8-45Hz), for LFP  
1100 site 1. Five trials per color condition are shown.

1101 E. Grand average spectrograms for each monkey, including normalized individual trials for all LFP  
1102 sites in each monkey.

1103 F. As in D, but for LFP site 3.

1104

1105 **Figure 3. Concurrent low and high beta band rhythms in motor cortex.**

1106 A. Average normalized power spectra in the pre-SC1 period across all trials for all sites in each  
1107 monkey. The curves reflect the mean power  $\pm$ SEM across LFP sites. The power spectral density for  
1108 each LFP site was normalized to the mean power between 10 and 40 Hz before averaging across all  
1109 trials in all sites. Overlain are distributions of single-trial peak frequency (frequency with maximal  
1110 power) between 10-40Hz in the same period.

1111 B. Distribution of the beta band dominance index for all LFP sites for each monkey, based on the  
1112 pre-SC1 period. Positive indices reflect low band (13-19Hz) dominance and negative indices reflect  
1113 high band (23-29Hz) dominance. Light gray bars include all sites, and black bars sites with  
1114 significantly different power in the low and high beta frequency ranges (paired t-test,  $p < 0.05$ ).

1115 C. Beta band dominance index distribution across the cortical surface. The indices for both  
1116 monkeys are plotted on top of the cortical surface reconstruction of monkey T (anterior towards the  
1117 left, and medial towards the top). Blue sites reflect high band dominance, and yellow sites reflect low



1118 band dominance. The three sites from anterior to posterior marked with red asterixes (\*) reflect the  
1119 example sites shown in Fig. 2. CS central sulcus; AS arcuate sulcus; PCD pre-central dimple.

1120 D. Average spectrograms for all high (left) and low (right) beta band dominant LFP sites for each  
1121 monkey.

1122

1123 **Figure 4. Main regressors explaining the High and Low beta variance.**

1124 A. Representation along the trial of the presence of the regressor in the winning model after the  
1125 application of a Bayesian Index Criterion (BIC) for the comparison of all possible models and their 2-  
1126 by-2 interactions, for the high beta (left) and the low beta (right). Each row represents a regressor,  
1127 the last row represents all possible interactions.

1128 B. Bottom. Representation of the average normalized high (left ; 21-29Hz) and low (right ; 12-  
1129 20Hz) beta amplitude (+/-SEM) along the trial, separated by the 3 color conditions. Top. Each  
1130 horizontal graph represents the significativity of the trial-by-trial modulation in beta amplitude by a  
1131 defined variable. The variables are, from bottom to top, color condition, eye velocity and hand  
1132 velocity (the two latter split into three graphs for the three color conditions). The significativity is  
1133 represented as a color gradient, white means non-significant, colored means significant, split in  
1134 significant positive correlations top and negative correlations bottom. The gradient of brightness in  
1135 the color is a gradual representation of the p-value from 0.01 (lightest color) to 1e-08 (darkest color).

1136

1137 **Figure 5. Correlations of low beta amplitude with hand velocity and RT.**

1138 A. Left. Equivalent of a joint peristimulus time histogram applied to the hand velocity and the low  
1139 beta amplitude along the trial. Each point of the matrix represents the corrected trial-by-trial cross  
1140 product of the two variables. The analysis was performed separately for the 3 trial types, top: blue  
1141 trials, middle: green trials, bottom: pink trials. Each colored matrix point was inferior (cold color) or  
1142 superior (warm color) to 100 values from shuffled matrices (equivalent p-value of 0.01). The vertical  
1143 and horizontal lines represent the appearance and disappearance of the valid SC for the 3 conditions.

1144 Right. Cross correlograms. Each value of the cross correlogram represents the average of main and  
1145 lagged diagonals of the matrices, separately for before (bottom) and after (top) the onset of the valid  
1146 SC.

1147 B. High beta split in two groups based on normalized RT, for each color condition. Lines above  
1148 each plot indicate correlation significance (and sign) with RT. Dark colors represent the high beta for  
1149 the quarter of the trials in which the monkeys were the slowest in each session (long RT). Light colors  
1150 represent the high beta for the quarter of trials in which the monkeys were the fastest in each  
1151 session (short RT). The representation of the significativity is the same as in Figure 4.

1152 C. Same representation for the low beta band.

1153

1154 **Figure 6. Correlation of high and low beta amplitude with the position of the gaze at optimal**  
1155 **lag.**

1156 A. High beta split in two groups based on gaze position 230ms earlier for each time point, for each  
1157 color condition. Lines above each plot indicate correlation significance (and sign) with preceding gaze  
1158 position. Dark colors represent the high beta for the times in which the monkey's gaze was inside the  
1159 working area (In). Light colors represent the high beta for the times in which the monkey's gaze was  
1160 outside the working area (Out). The representation of the significativity is the same as in Figure 4.

1161 B. Same representation for the low beta band.

1162

1163 **Figure 7. Systematic changes in beta amplitude within sessions – Time-on-task.**

1164 A. High beta split in groups based on the time elapsed in the session, for each color condition.  
1165 Lines above each plot indicate correlation significance (and sign) with the elapsed time. Dark colors  
1166 represent the high beta for the first third of trials performed in each recording session. Light colors  
1167 represent the high beta for the last third of trials performed in each session. The representation of  
1168 the significativity is the same as in Figure 4.

1169 B. Same representation for the low beta band.

1170 **Suppl. Fig. 1. Supplementary behavioral results.**

1171 A. Average hand velocity in one example session in monkey T, split for the three color conditions.

1172 On the left, zoomed in to the micro-movements performed during the trial between central touch

1173 and GO. To the right with velocity scale adjusted to the final center-out reaching movement after GO.

1174 Vertical dotted lines reflect onset/offset of visual task events. targ: target touch onset; rew: reward.

1175 B. Hand velocity in a randomly selected subset of correct green trials in the same session as in A.

1176 The velocity scale is indicated on the left. Vertical dotted lines reflect onset/offset of visual task

1177 events. The two solid black vertical lines connected with a horizontal arrow reflect the epoch used to

1178 estimate X and Y offsets of micromovements in the post-cue epoch (C).

1179 C. Hand cursor displacement caused by micro-movements across all green trials in each monkey,

1180 split for trials with targets in each of the four corners. Each dot reflects one trial, and the position

1181 reflects the relative X and Y offset 1s after the onset of SC2 (2nd vertical solid black line in B),

1182 compared to the position at SC2 onset (1st vertical solid black line in B). UR-upper right; LR-lower

1183 right; LL-lower left; UL-upper left.

1184 D. Average hand velocity in each of the three post-SC delays, taken at 500ms after cue offset, split

1185 for color condition. Horizontal black lines on top of the bar plots denote significant differences in

1186 single-trial hand velocity between the different color conditions.

1187 E. Deltoid EMG amplitude, recorded in the same behavioral session as shown in A-B, during the

1188 delays and split for the three color conditions (left) and aligned to movement onset and averaged for

1189 the three color conditions (right). For each color condition, we show two directions, towards and

1190 away from the animal (lower left vs. upper left targets).

1191

1192 **Suppl. Fig 4. Beta band modulations in error trials and condition decoding with beta amplitude.**

1193 A. Average beta amplitude in high beta (left) and low beta (right) in correct and distractor error

1194 trials, split for the three color conditions from top to bottom. We only included trials in which the

1195 target selected (correct or distractor) did not coincide in space with any of the other two SC. The

1196 thicker line in each plot represents correct trials, while the thinner lines represent the error trials in  
1197 which either one or the other distractor was used.

1198 B. Decoding performance of SEL (color condition) category in correct trials, using either high (left)  
1199 or low (right) beta band amplitude. Performance is presented as proportions of the total number of  
1200 trials of each category in the test set (totalling 1 for each row). The diagonal represents the true  
1201 positive accuracy, and the off-diagonal values correspond to the proportions of trials of each  
1202 category incorrectly assigned to another category. The chance level (0.37) is indicated on the color  
1203 scale bar.

1204 C. Decoding performance on distractor error trials, using the classifier previously trained on the  
1205 correct trials. The first column for each band represents the accuracy when predicting the attended  
1206 distractor (i.e. what the monkey actually did); the second column represents the accuracy when  
1207 predicting the correct SEL category (i.e. what the monkey should have done). The same chance level  
1208 applies to these predictions as for the decoding of correct trials.

1209

1210 **Suppl. Fig. 5. Correlation of hand velocity with RT.**

1211 Hand velocity split in two groups based on normalized RT, for each color condition. Lines above  
1212 each plot indicate correlation significance (and sign) with RT. Dark colors represent the hand velocity  
1213 for the quarter of the trials in each session with longer RT. Light colors represent the hand velocity  
1214 for the quarter of trials in each session with shorter RT. The representation of the significativity is the  
1215 same as in Figure 4.

1216

1217 **Suppl. Fig. 6. Correlations between beta amplitude and gaze position.**

1218 A. Top. High beta split in groups based on the monkey's position of the gaze at different time lags  
1219 (Left: -230ms, Middle 0ms, Right +230ms), all color conditions combined. Bottom. Same  
1220 representation for the low beta band.

1221 B. Proportion of bins in which the beta was significantly different depending on gaze position. The  
1222 x-axis represents the different temporal lags that were tested. A negative lag means beta is leading  
1223 gaze (i.e. a correlation between LFP at time  $t_0$  and the position of the gaze at time  $t_0 + \text{lag}$ ). A  
1224 positive lag means beta is lagging gaze (i.e. a correlation between LFP at time  $t_0$  and the position of  
1225 the gaze at time  $t_0 - \text{lag}$ ).

1226 C. Low beta band split in groups of trials based on the position of the gaze at 200ms after the  
1227 onset of the valid SC. Blue and orange represent the trials in which the monkeys were looking inside  
1228 the working area (either on the target, or elsewhere). Yellow represents the trials in which the  
1229 monkeys were looking outside the working area.

1230

1231 **Suppl. Fig. 7. Spectral parametrization for early and late trials.**

1232 A. Spectral parametrization using FOOOF for early (left) and late (right) trials in the sessions, for  
1233 each monkey separately. The black line corresponds to the original data and the red line to the  
1234 model fit. The algorithm identifies the spectral peaks and their peak frequency (green). A frequency  
1235 range of 5-194Hz was used for fitting the data for both monkeys.

1236 B. Spectrum decomposition in periodic (left) and aperiodic (right) signal components, in early and  
1237 late trials in the sessions, for each monkey. The frequency axis was cut at 60Hz to focus on the lower  
1238 frequencies including the beta bands.

1239

1240 **Suppl. Table 1**

1241 Summary of number of trials included for behavioral analyses, percent of distractor errors and RTs  
1242 for each color condition and movement direction for each animal. UR-upper right; LR-lower right; LL-  
1243 lower left; UL-upper left.

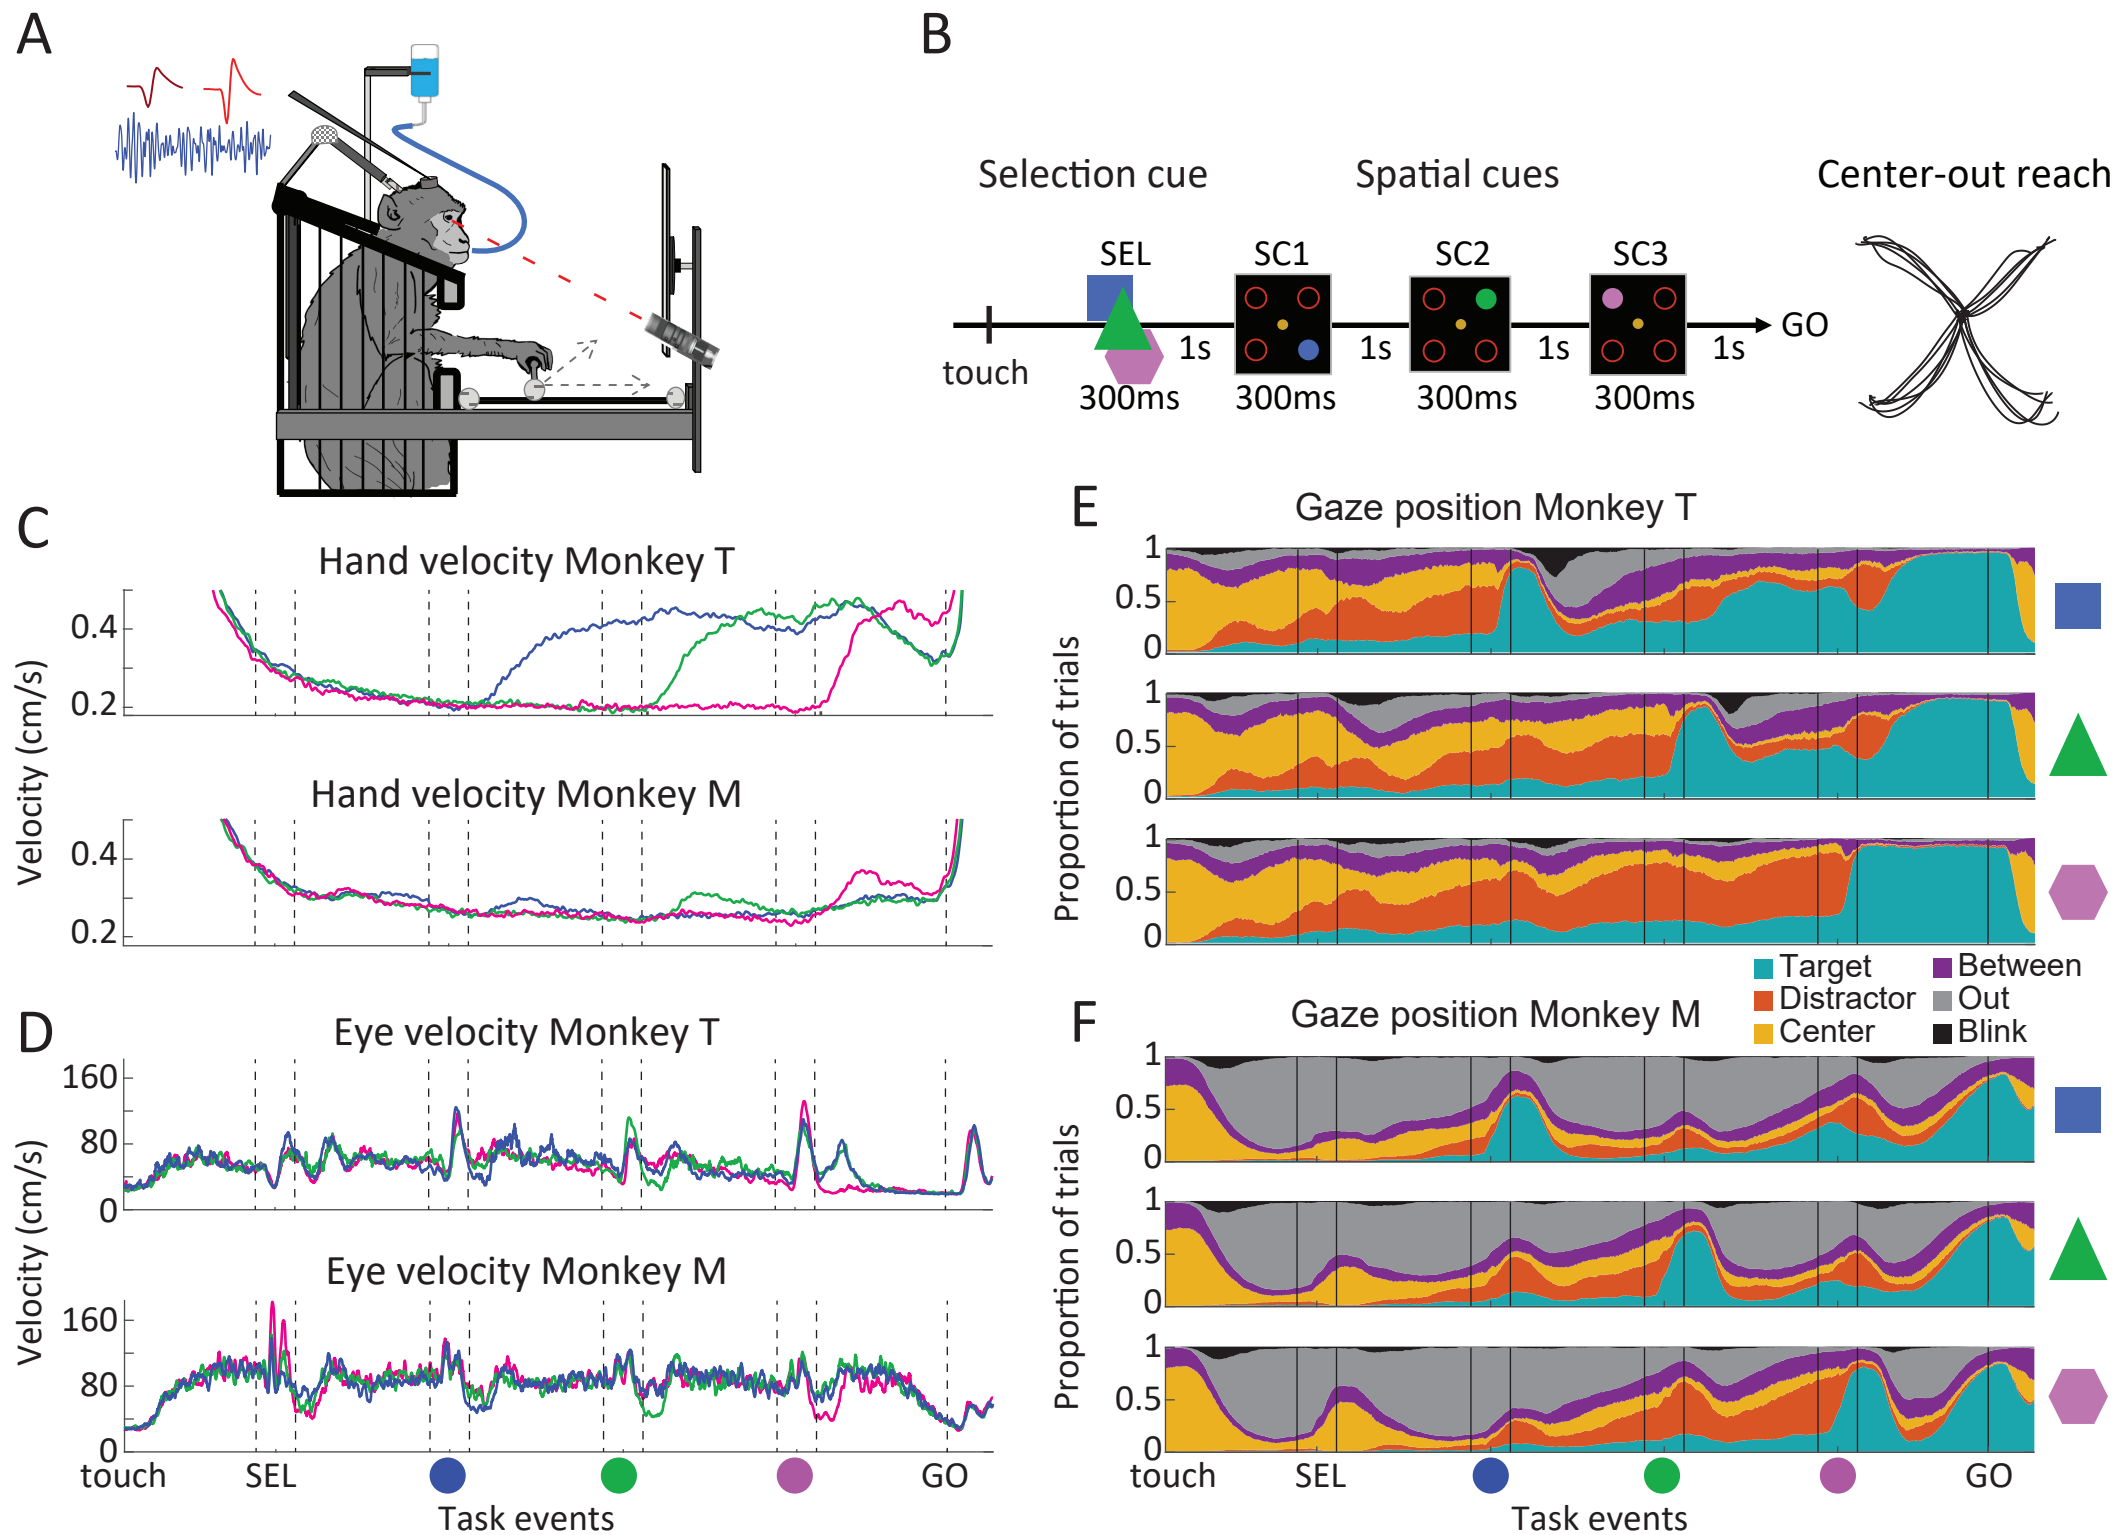

**Figure 1. Experimental setup and task, spontaneous hand and eye movements.**

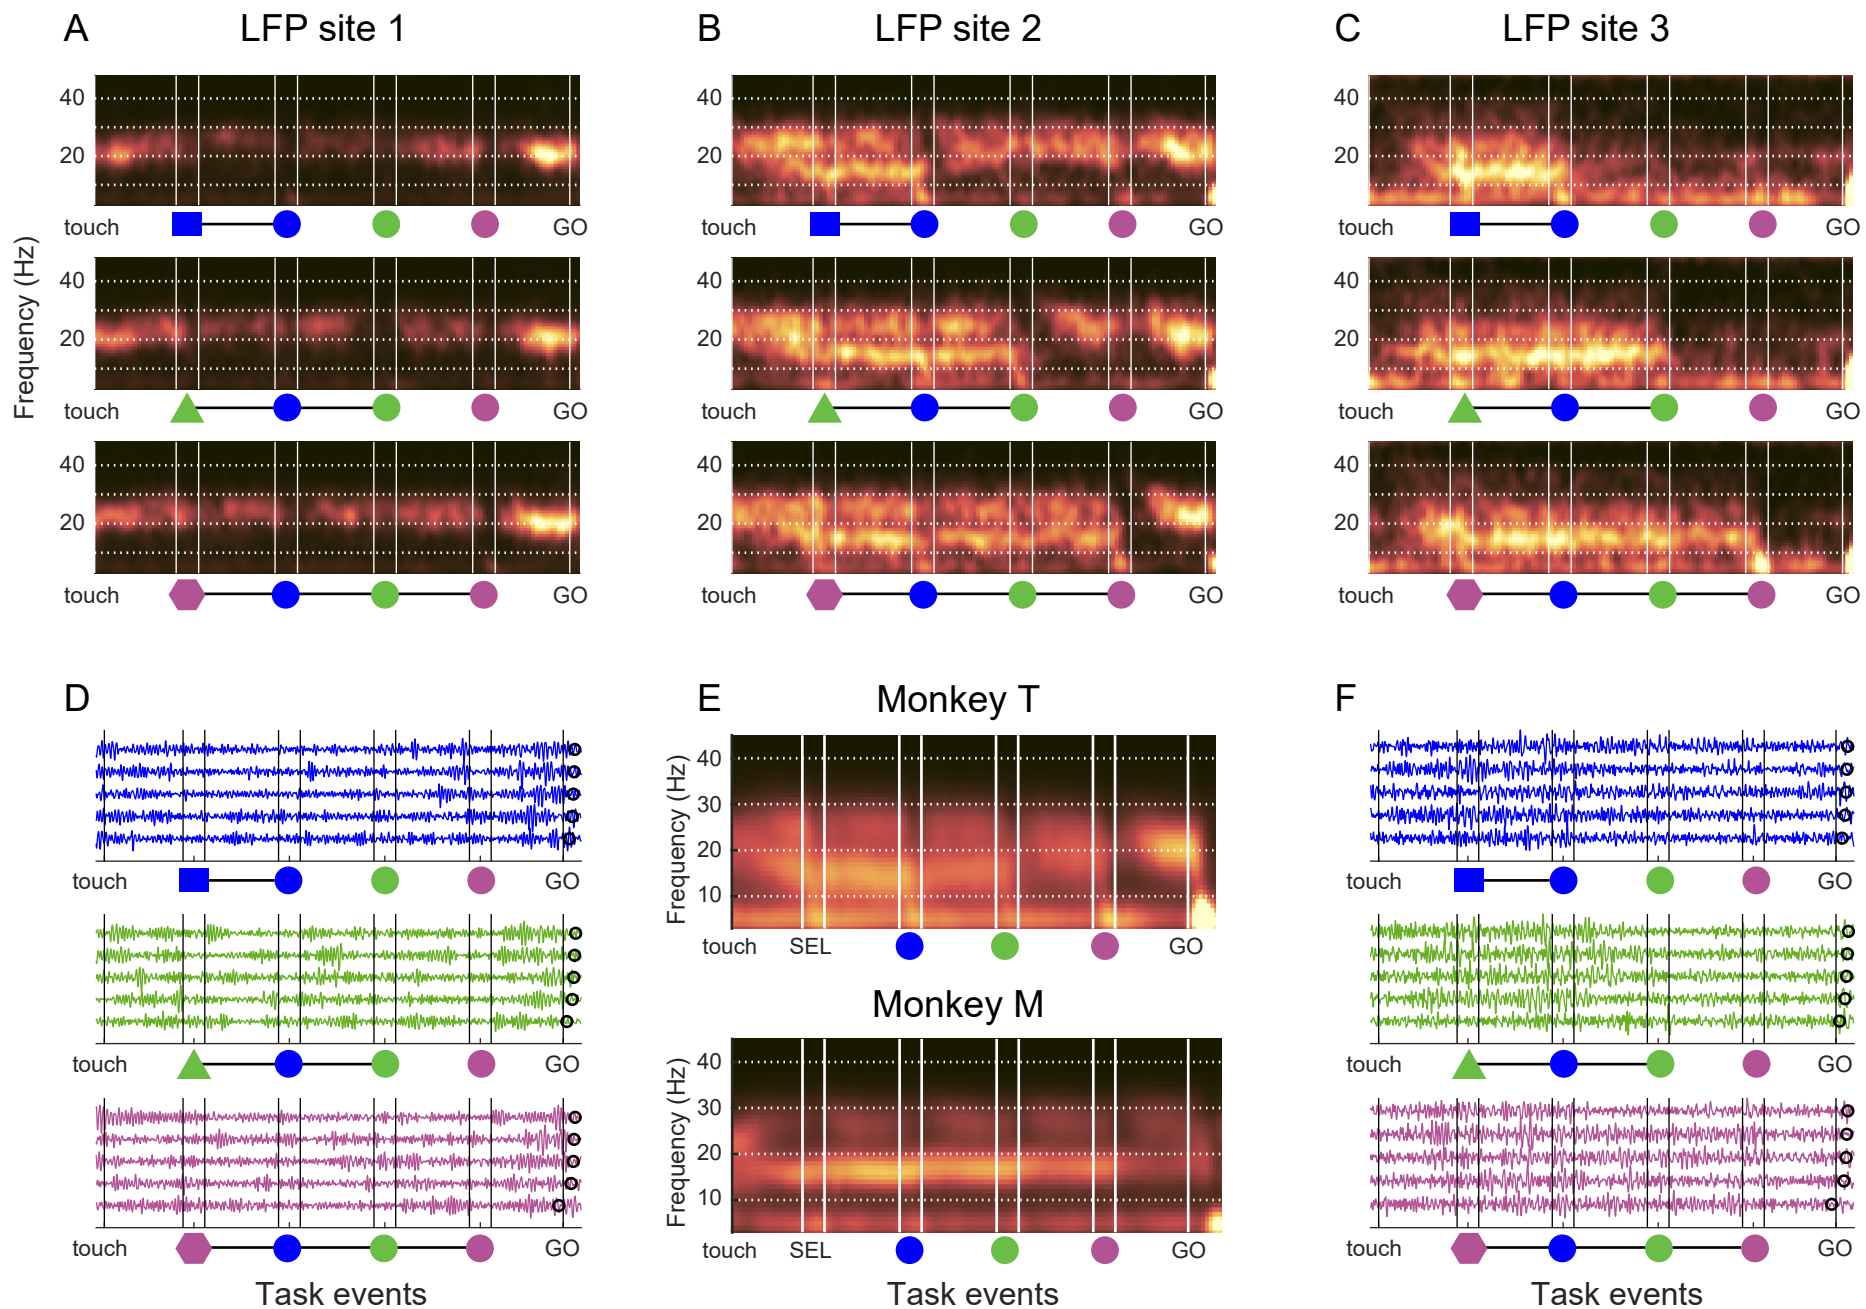

**Figure 2. Example LFP sites and grand average spectrogram.**



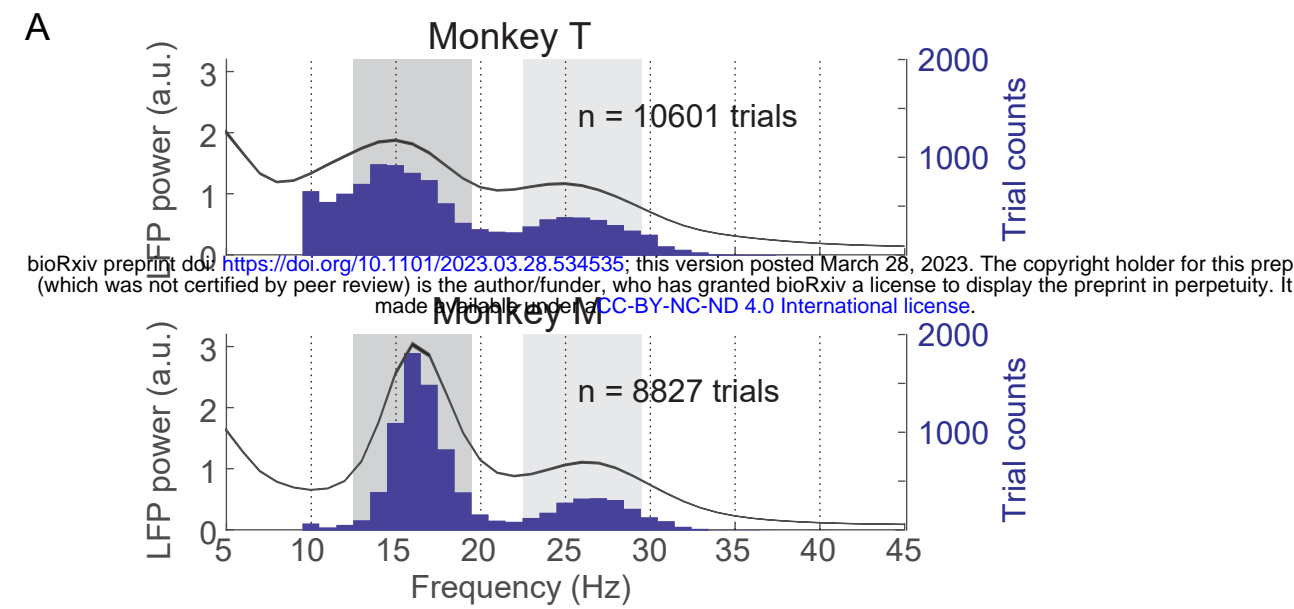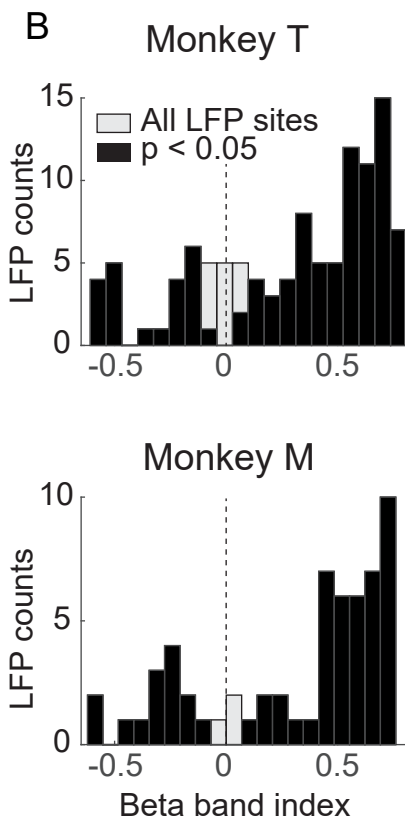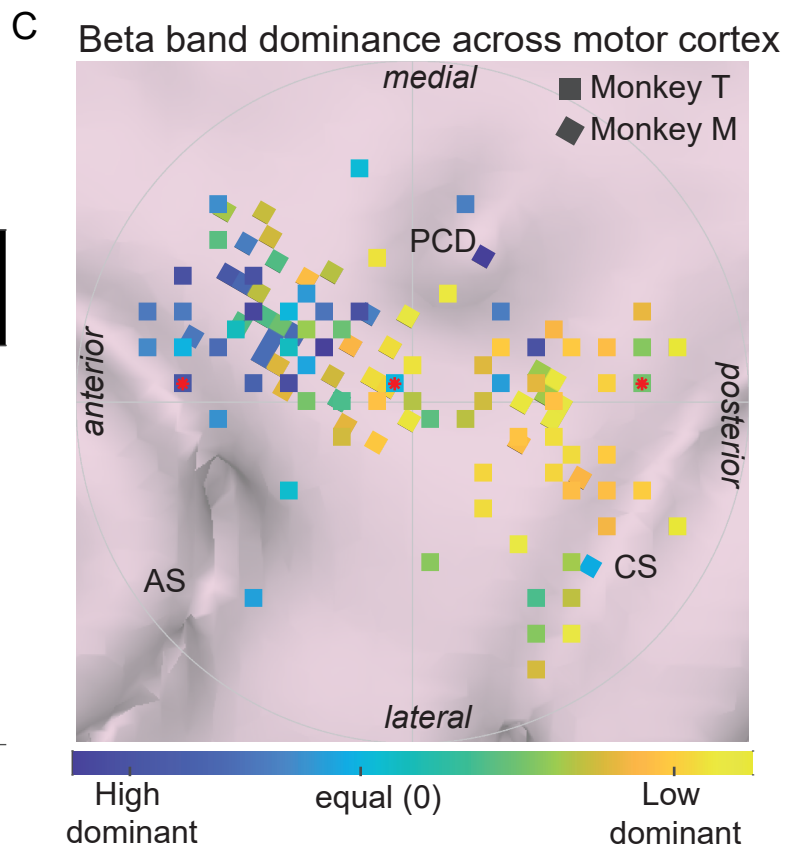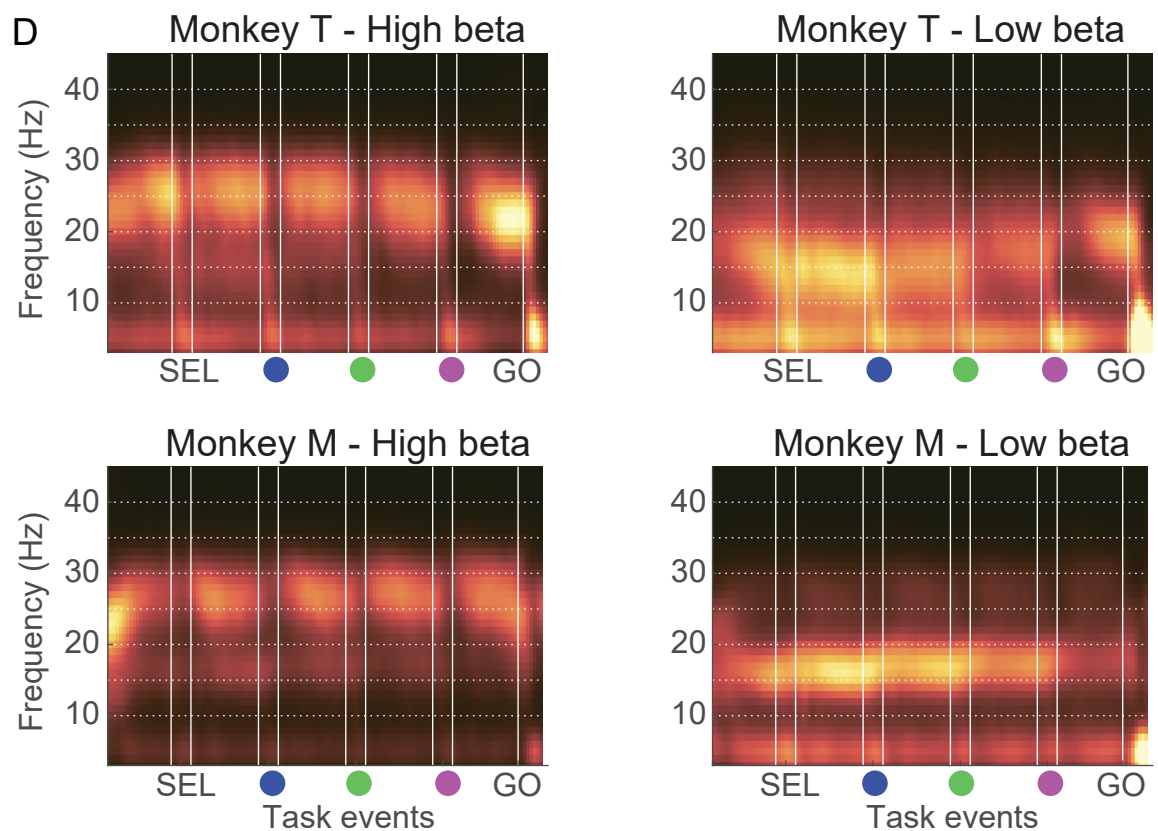

**Figure 3. Concurrent low and high beta band rhythms in motor cortex.**



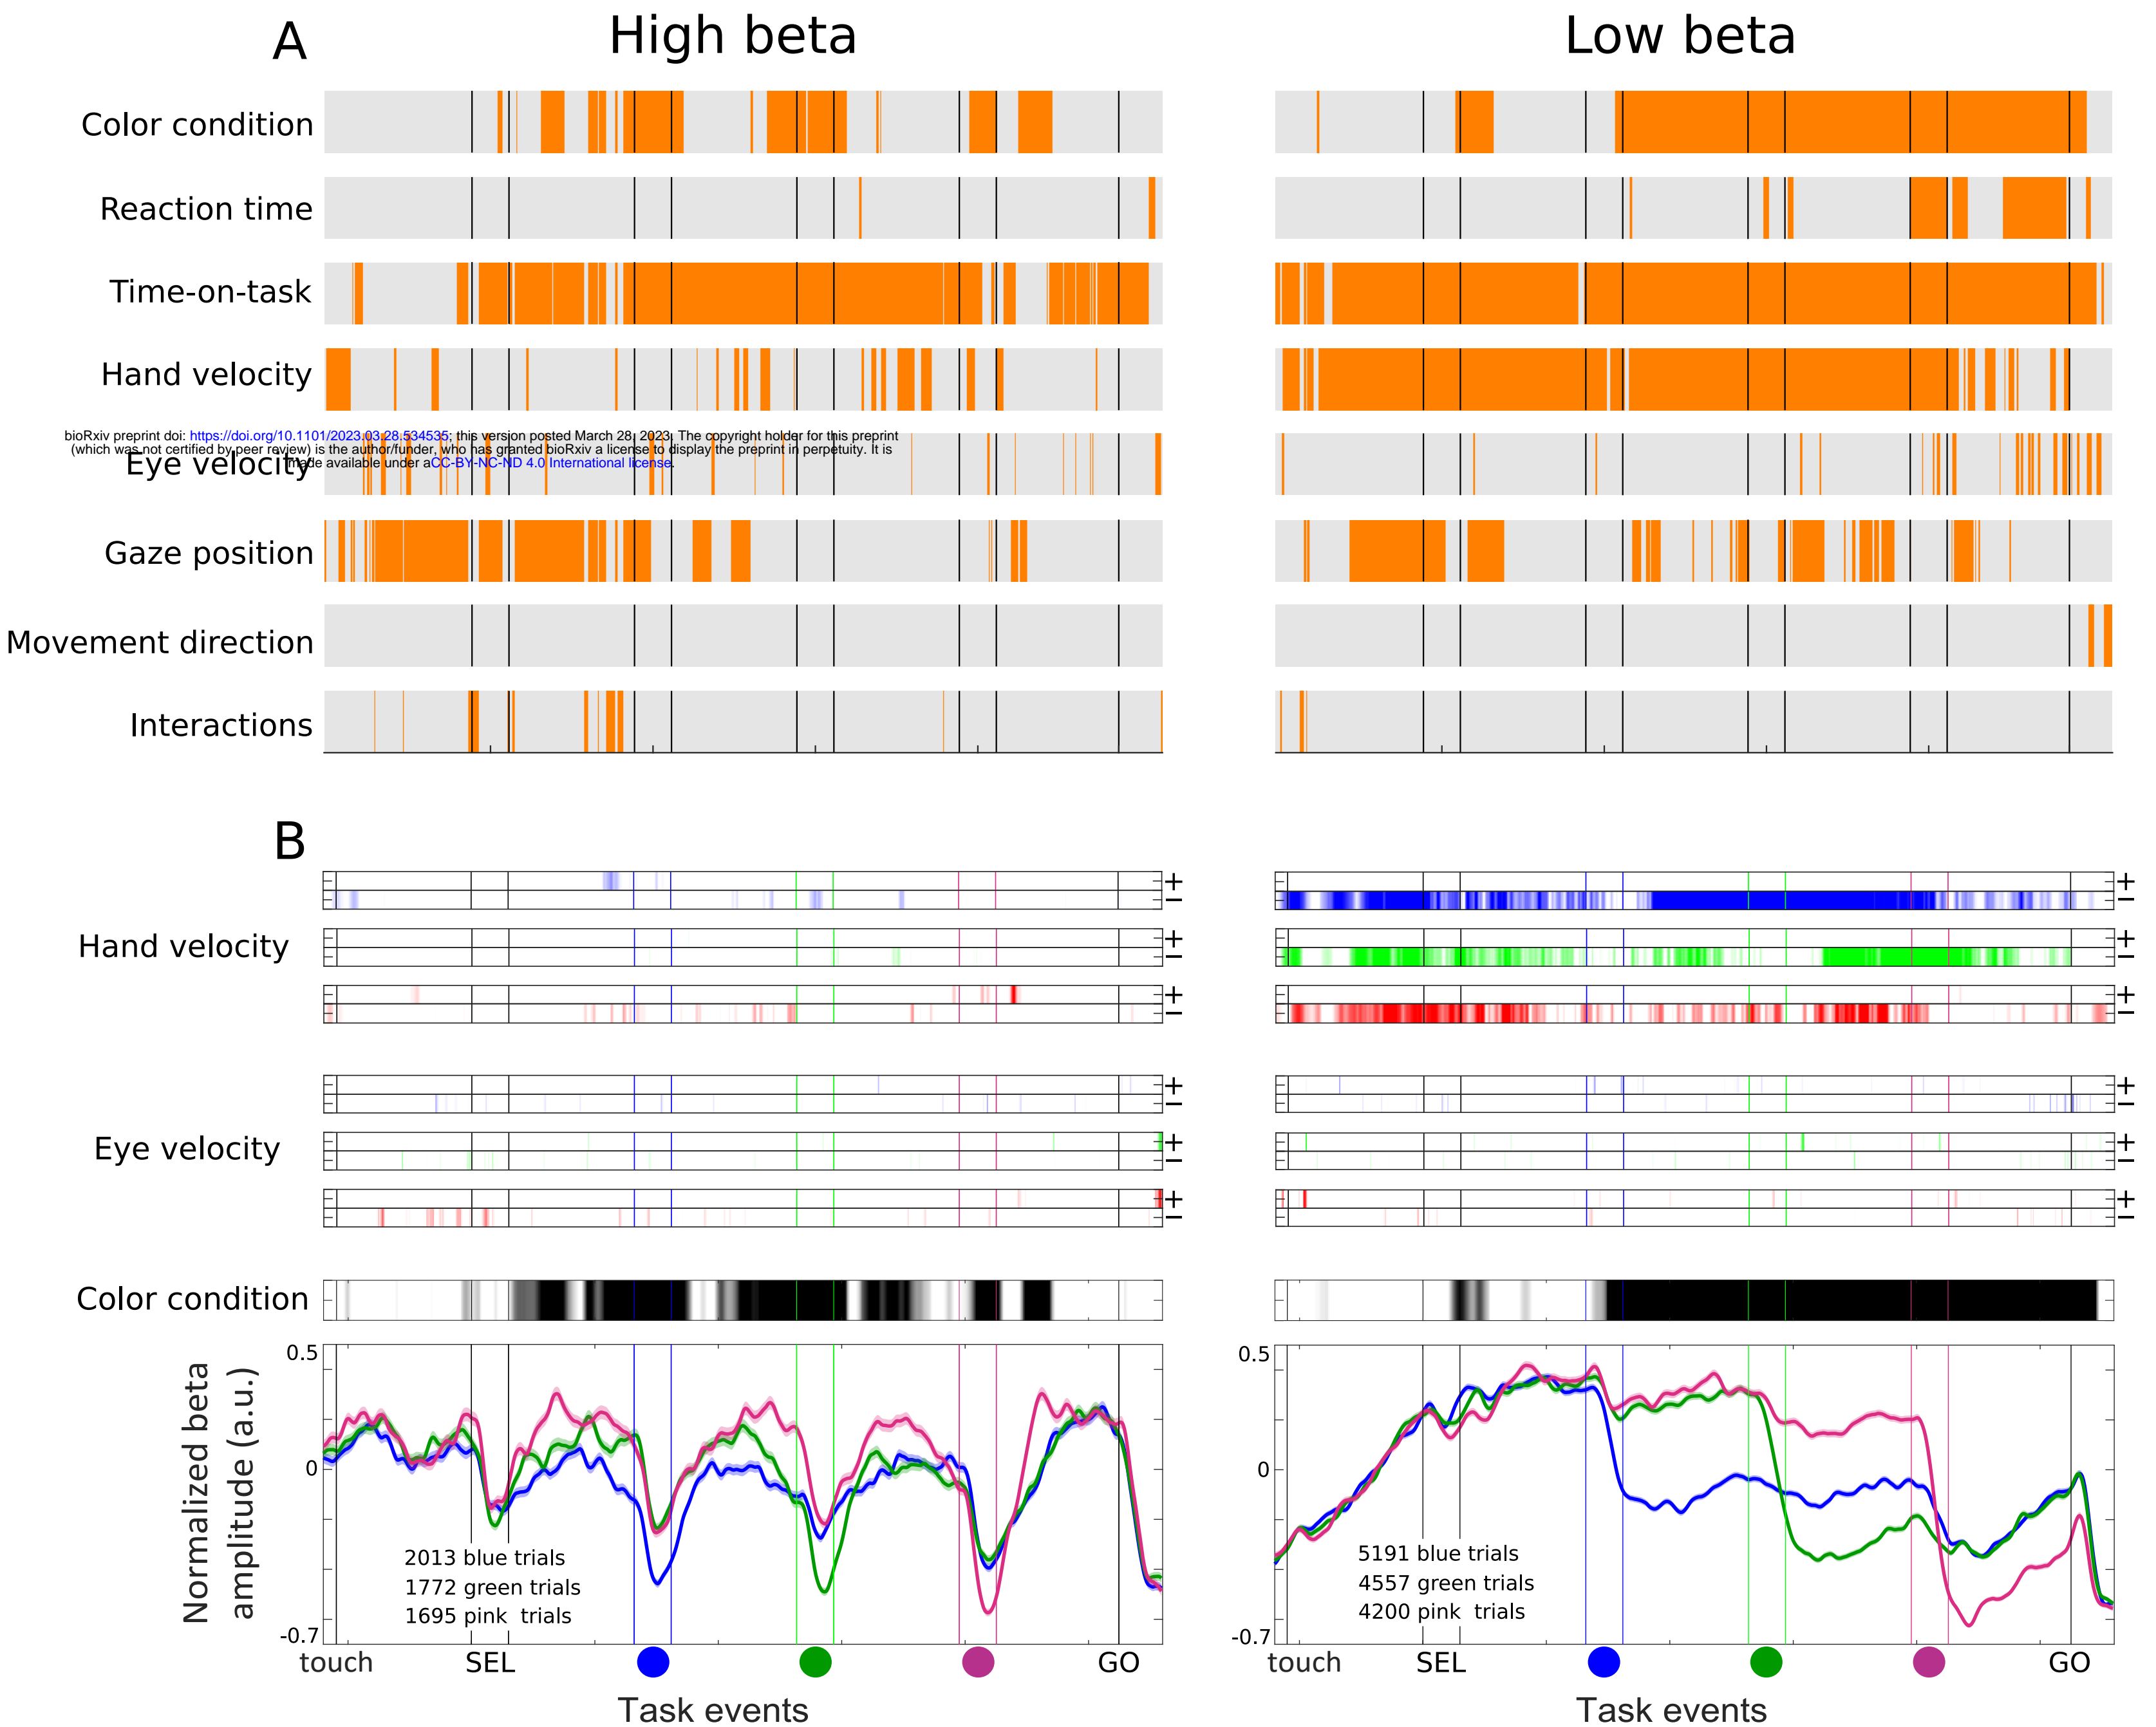

**Figure 4. Main regressors explaining the High and Low beta variance.**



# Gaze position

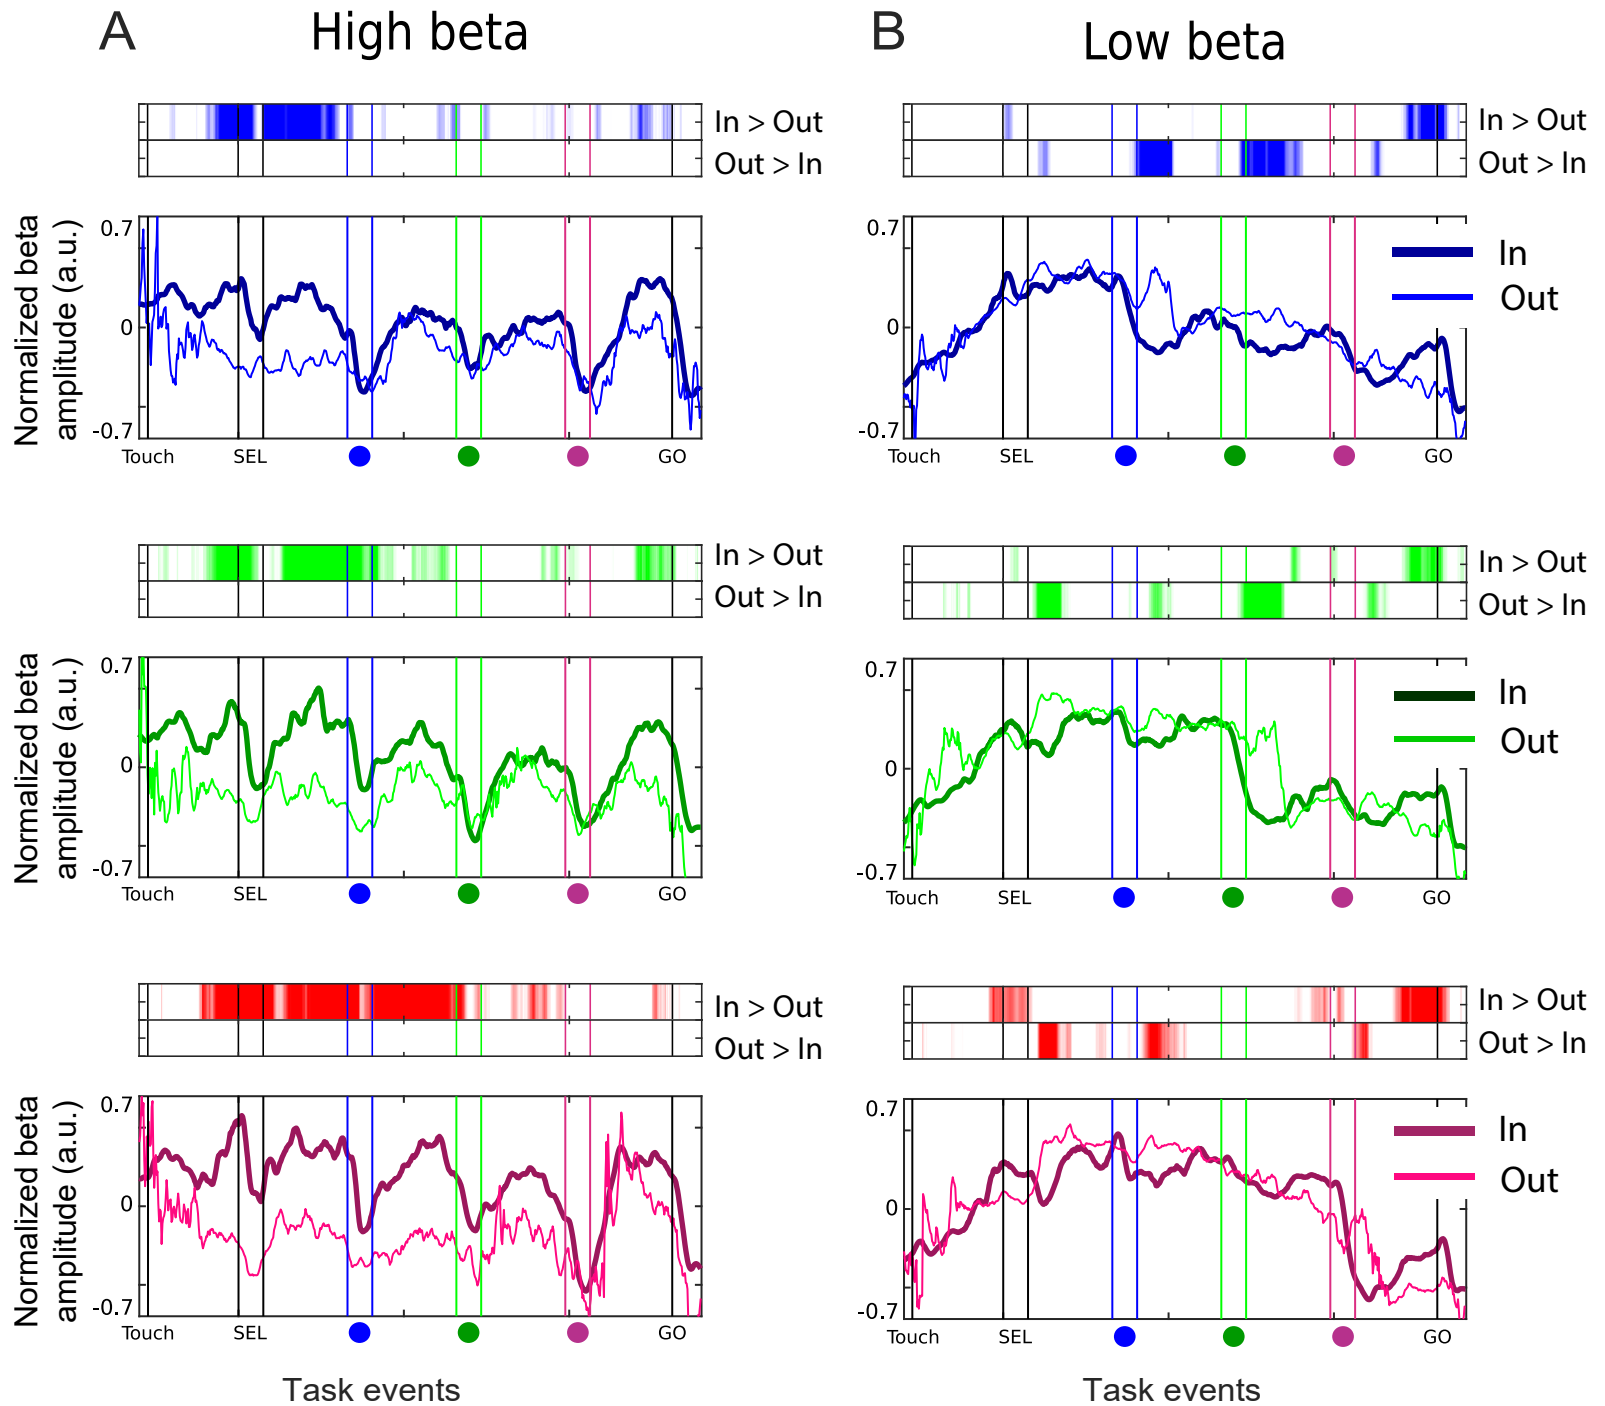

**Figure 6. Correlation of high and low beta amplitude with the position of the gaze at optimal lag.**

# Time-on-task

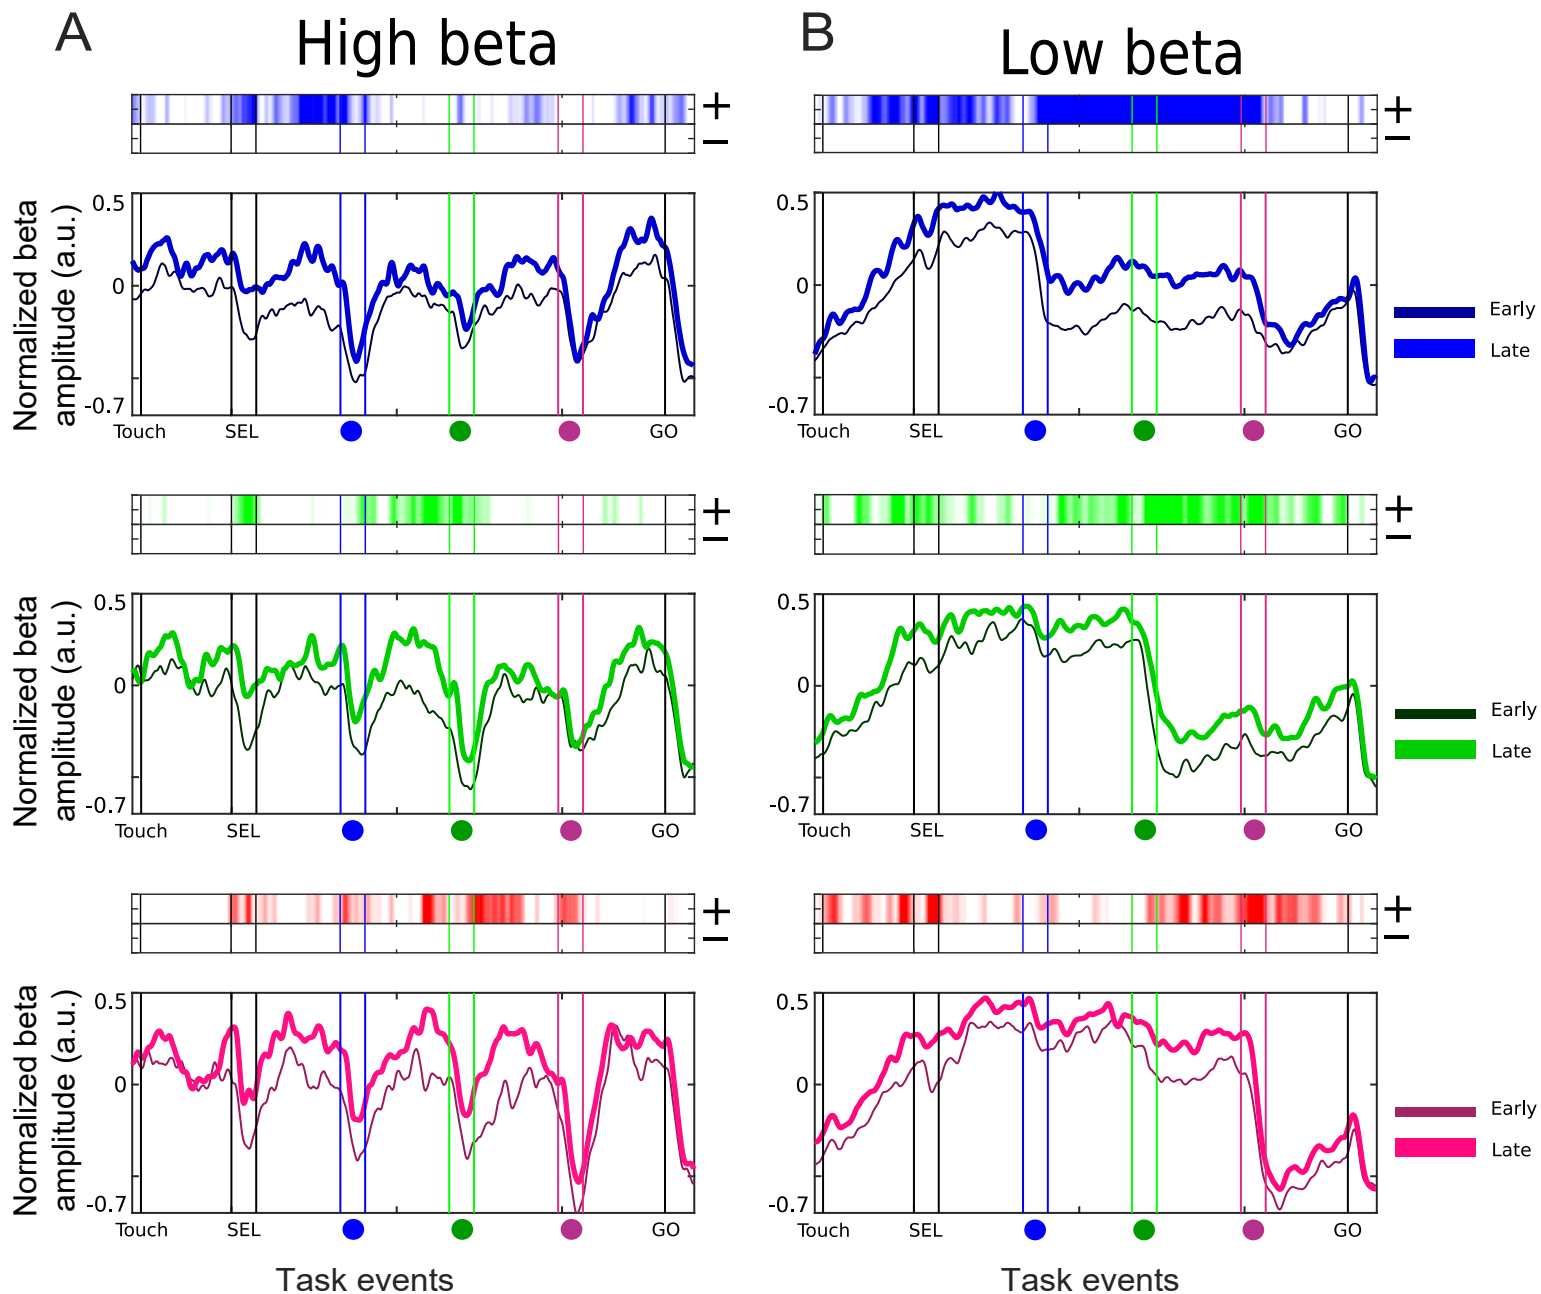

**Figure 7. Systematic changes in beta amplitude within sessions – Time-on-task.**



**A**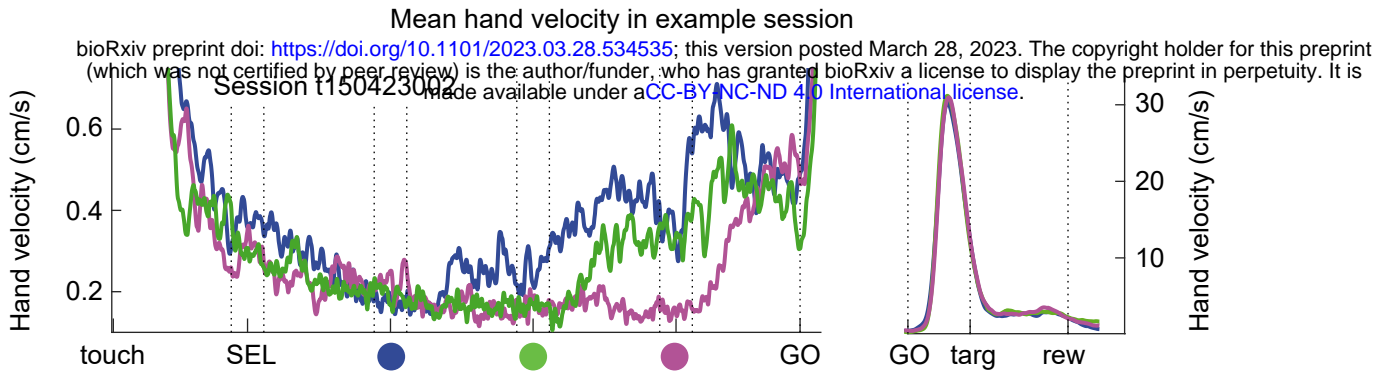**B**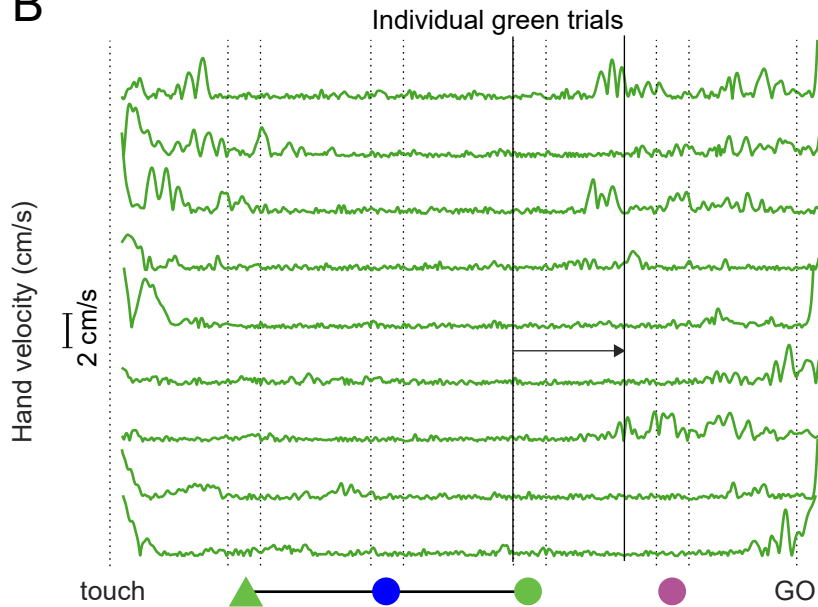**C**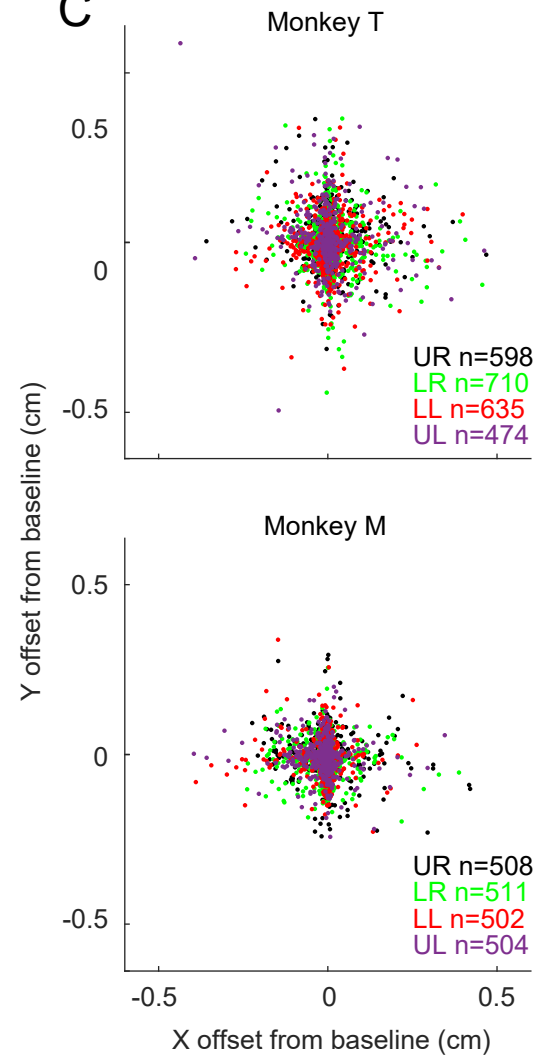**D**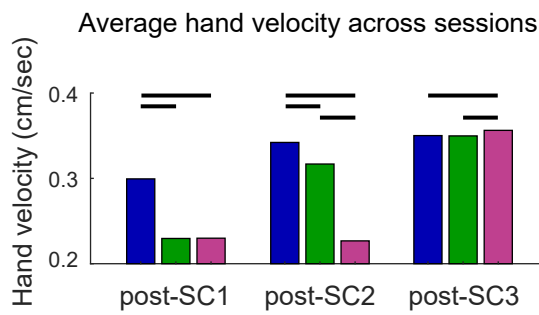**E**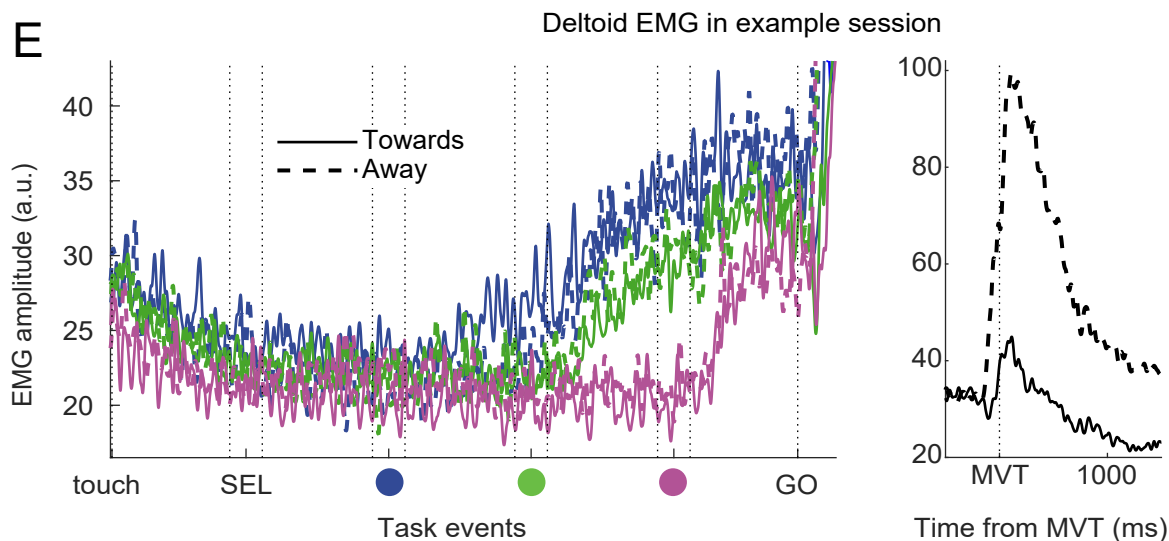

**A**

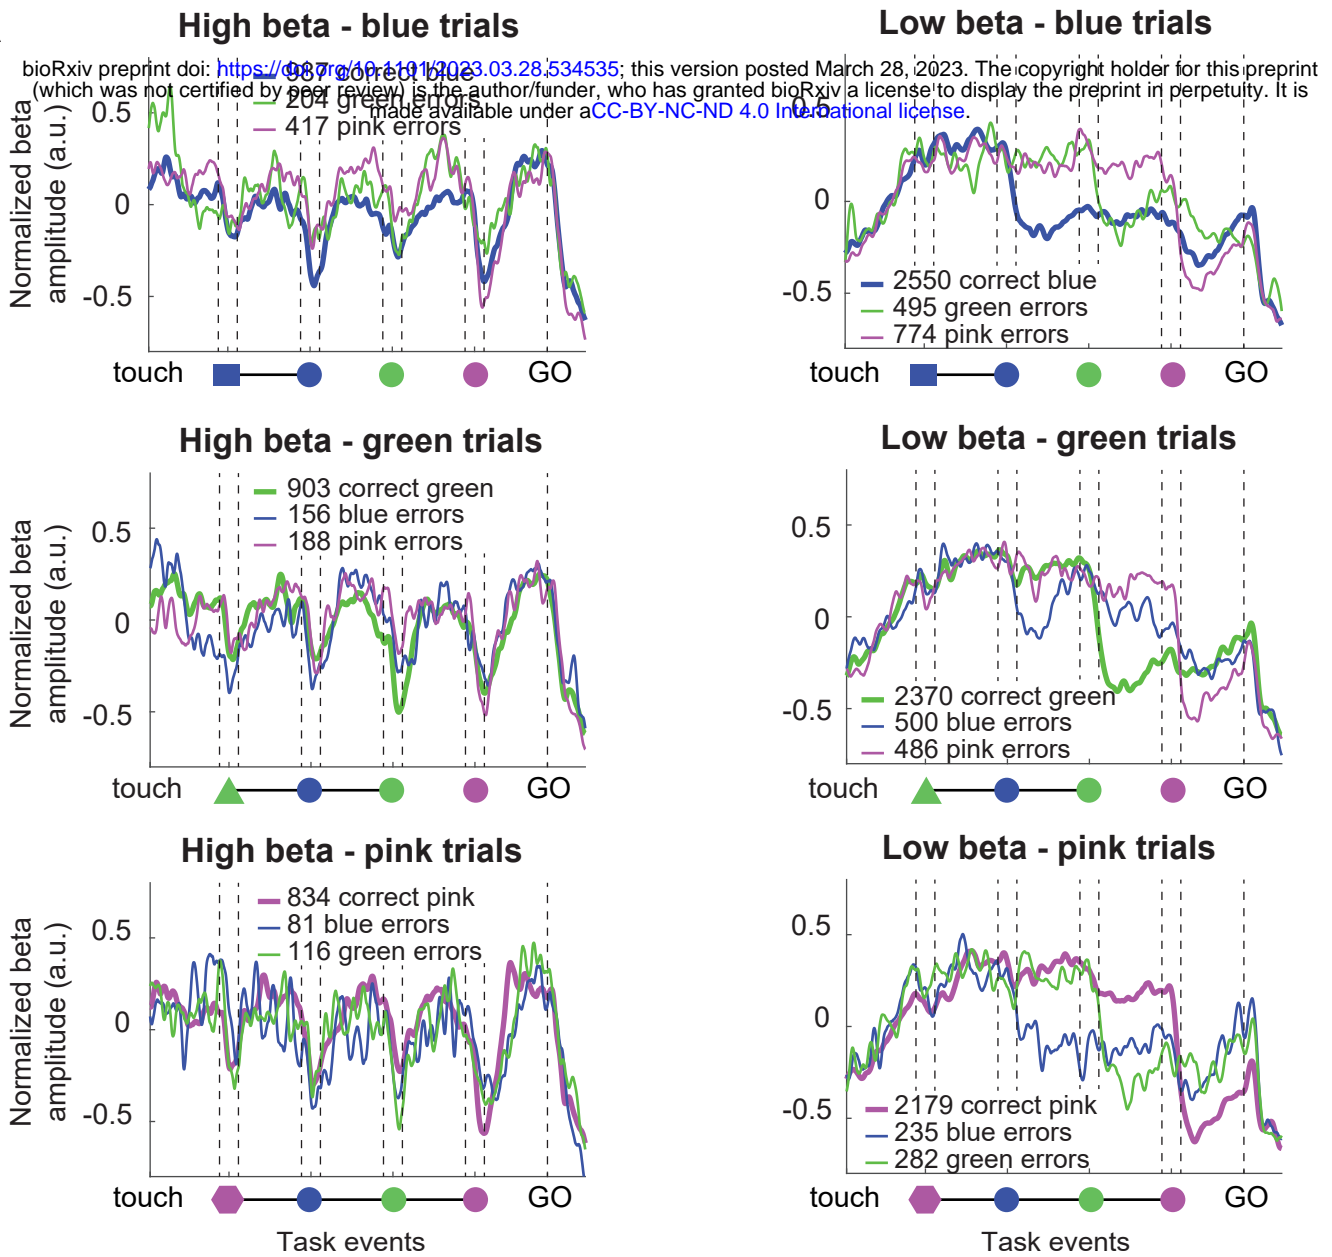

**B**

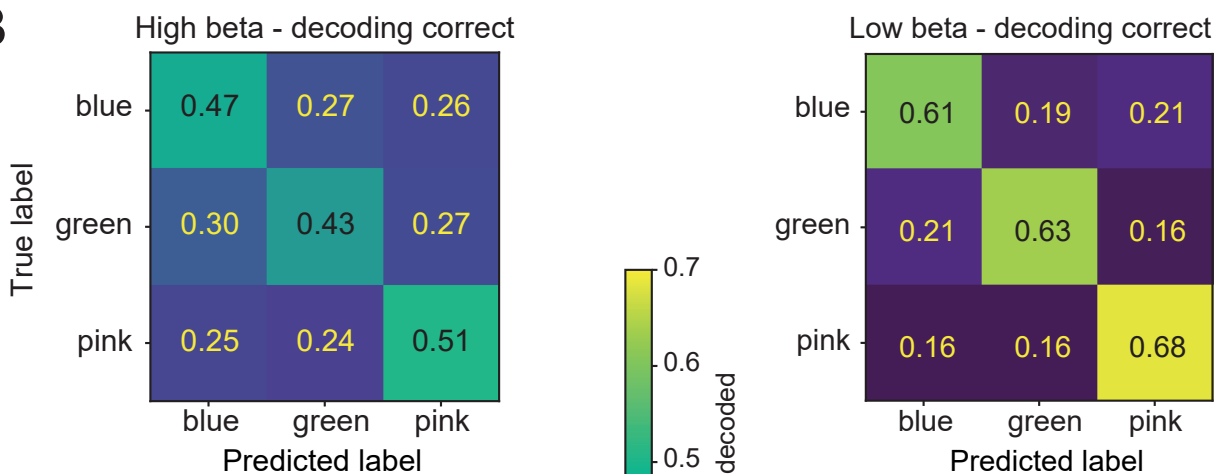

**C**

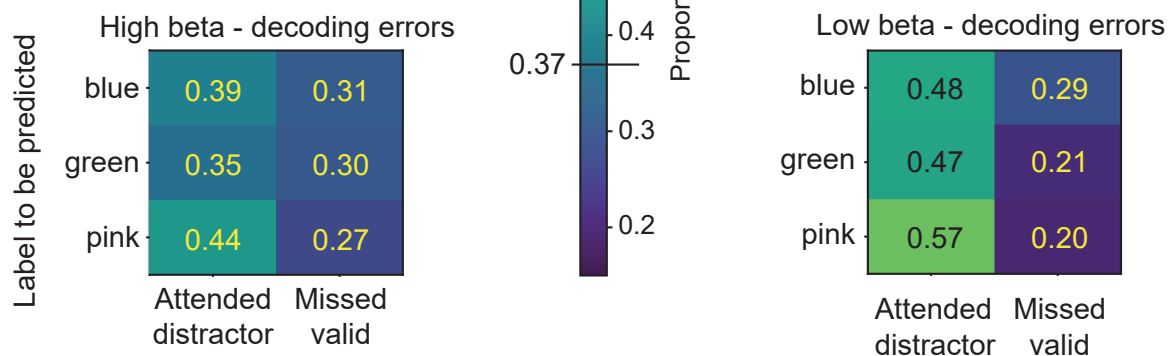

**Suppl. Fig 4. Beta band modulations in error trials and condition decoding with beta amplitude.**

## Hand velocity vs. RT

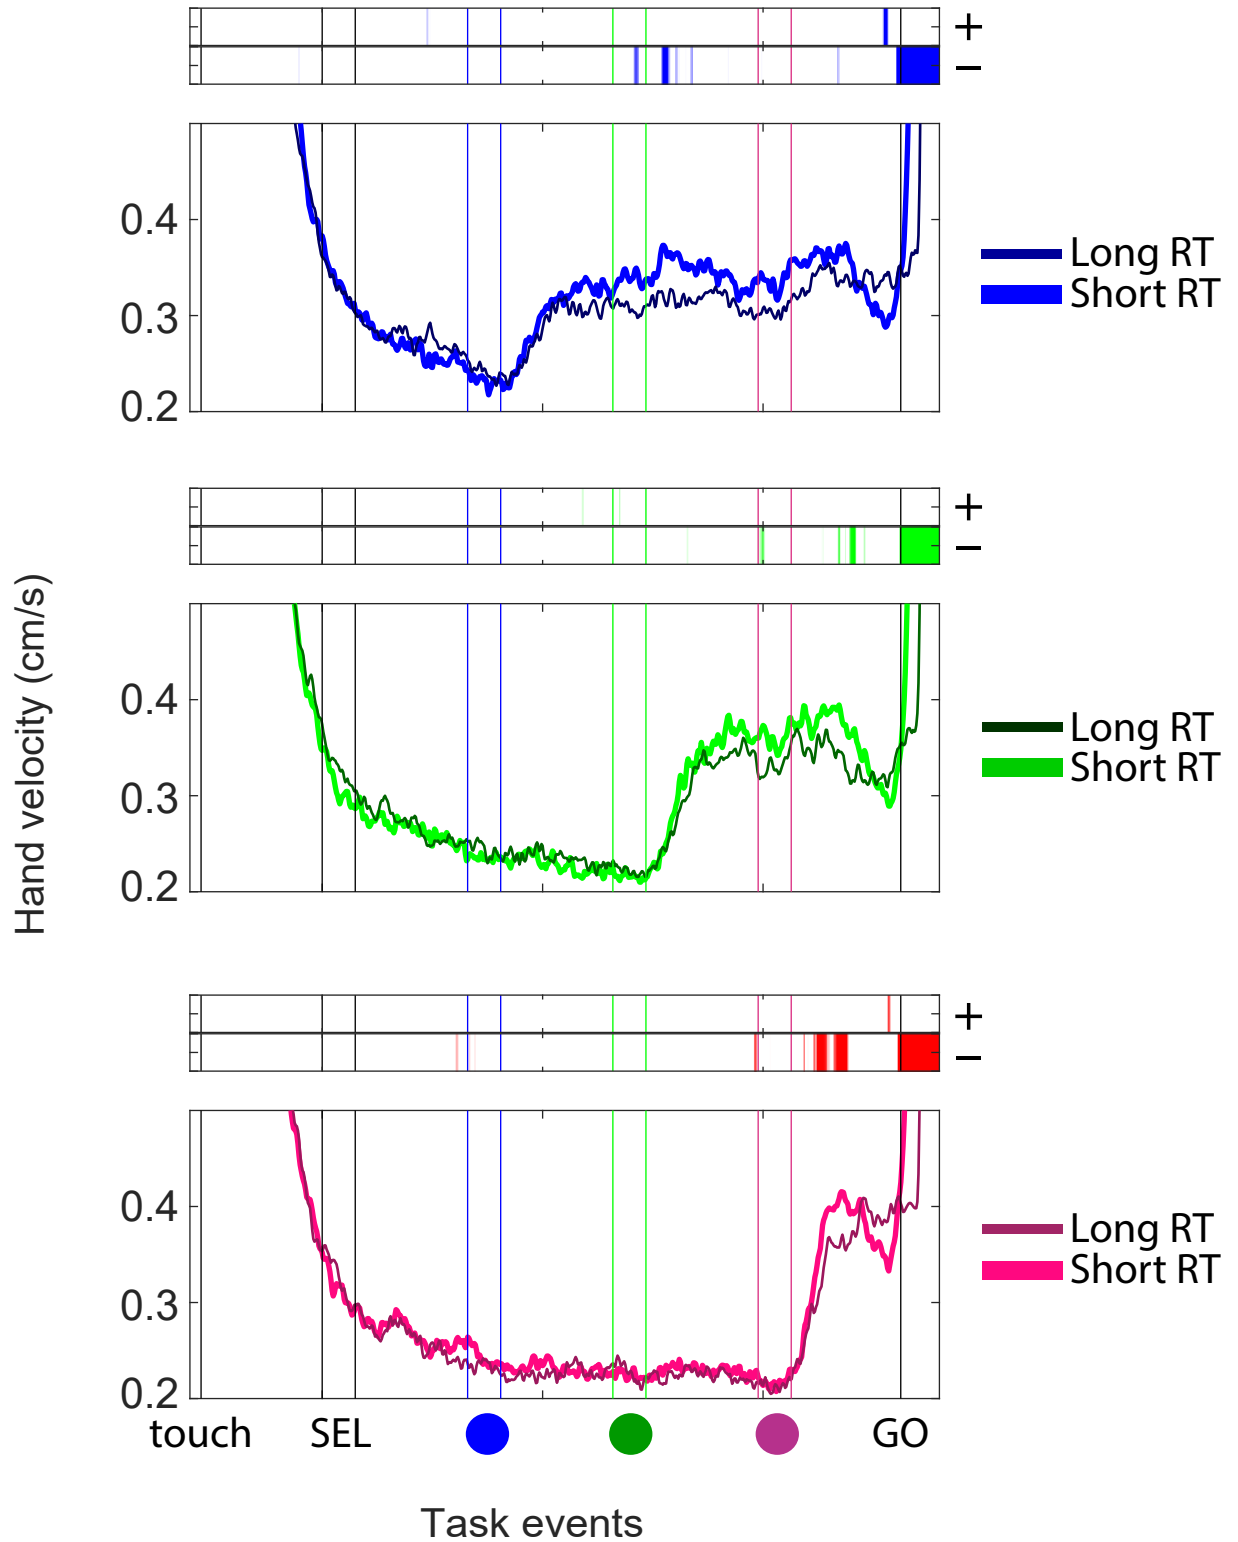

Suppl. Fig. 5 Correlation of hand velocity with RT.

# Gaze position

**A**

High beta - Lag -230

High beta - Lag 0

High beta - Lag 230

In > Out  
Out > In

Normalized beta  
amplitude (a.u.)

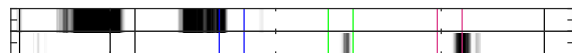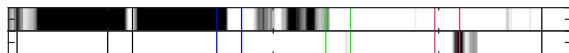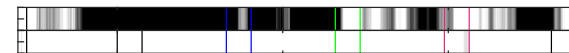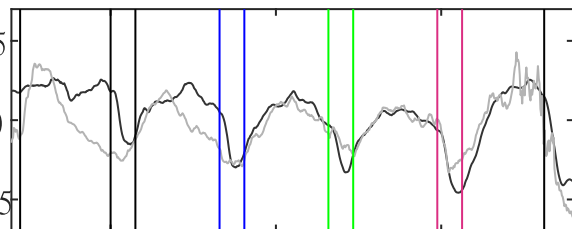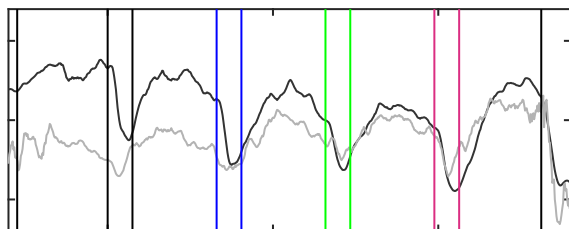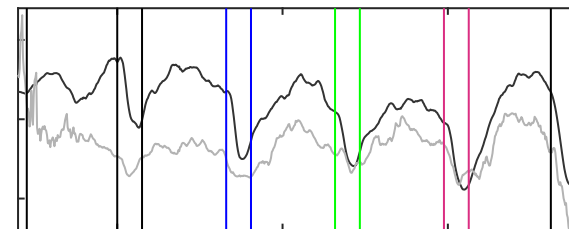

Low beta - Lag -230

Low beta - Lag 0

Low beta - Lag 230

In > Out  
Out > In

Normalized beta  
amplitude (a.u.)

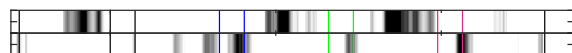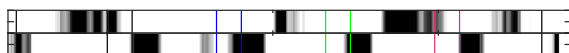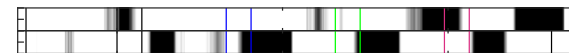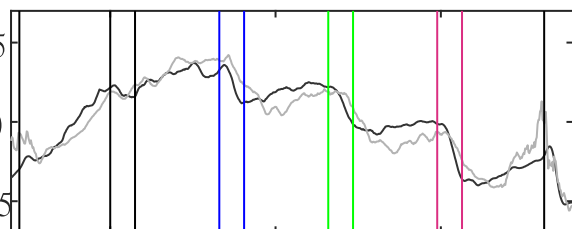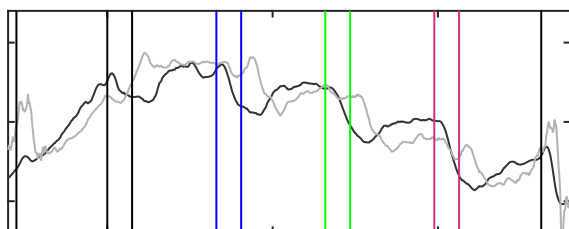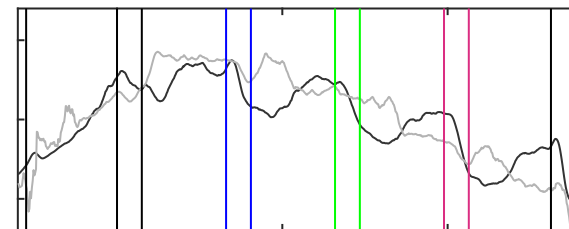

touch SEL ● ● ● GO touch SEL ● ● ● GO touch SEL ● ● ● GO

Task events

**B**

High beta

Low beta

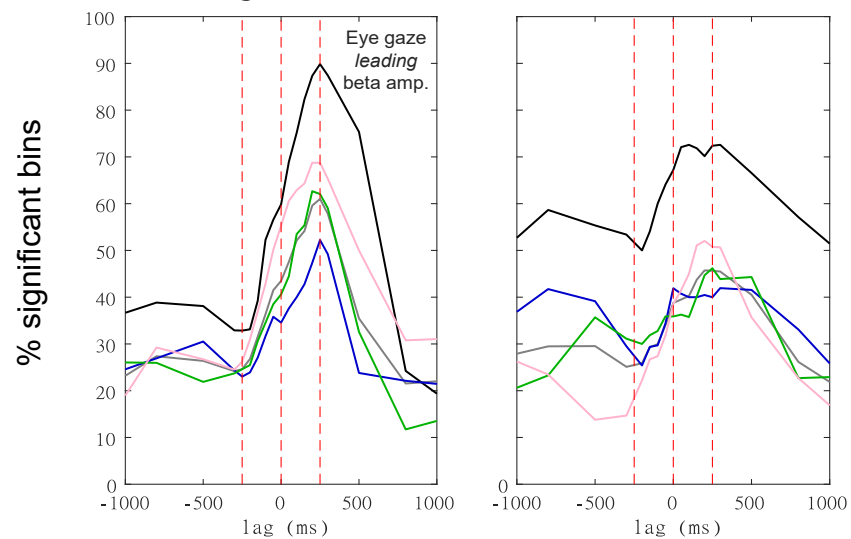

**C**

Drop of Low beta

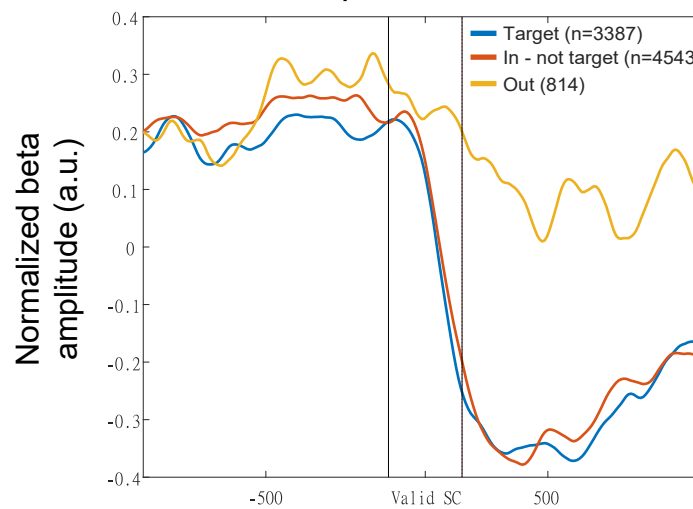

Suppl. Fig. 6. Correlations between beta amplitude and gaze position.



A

Monkey T

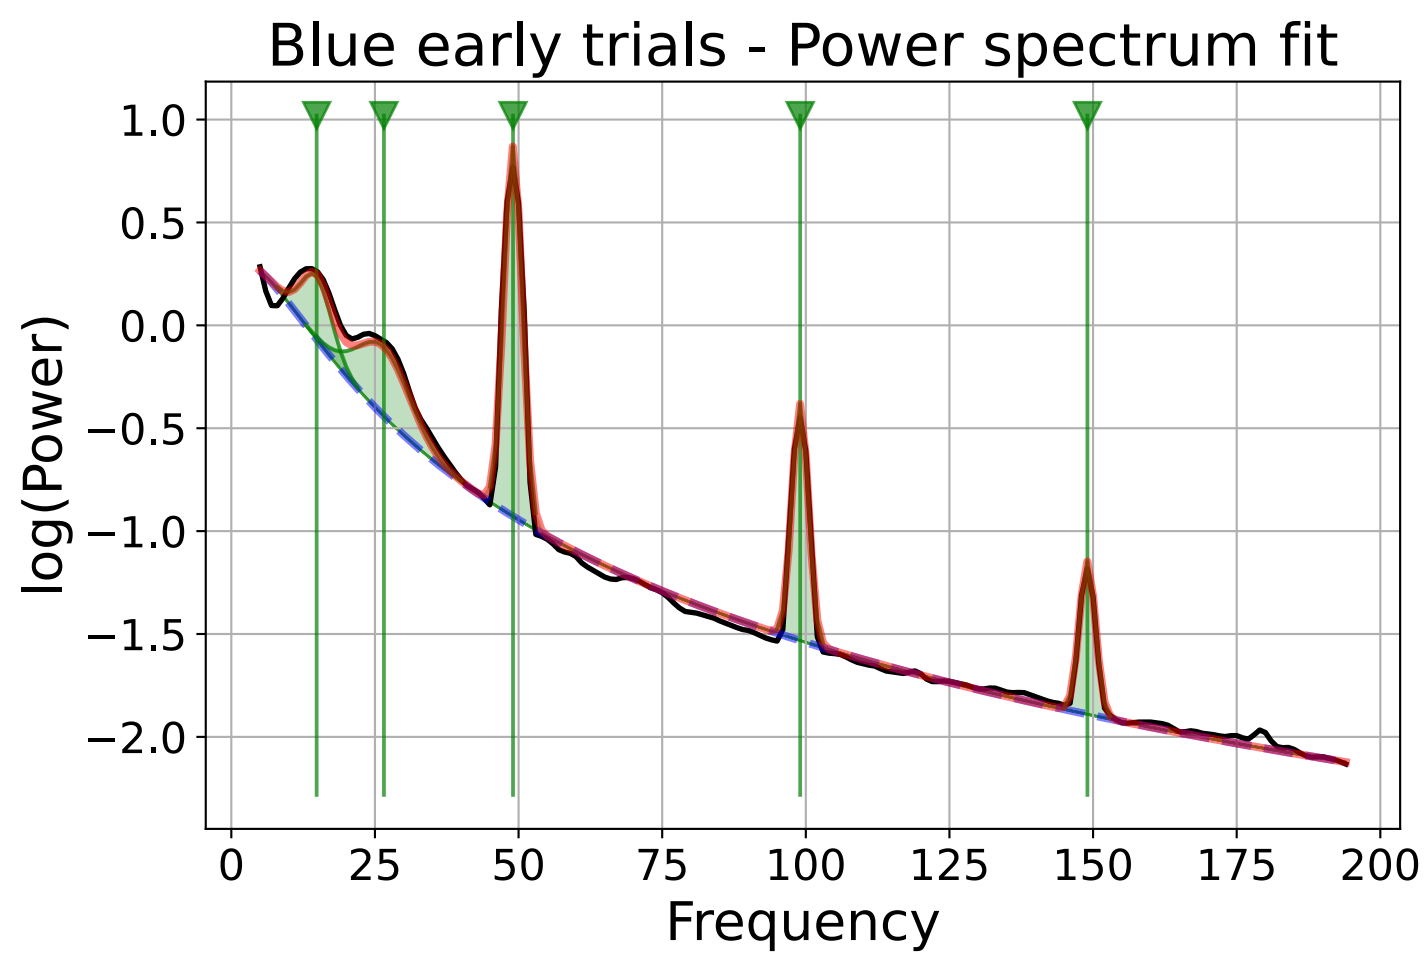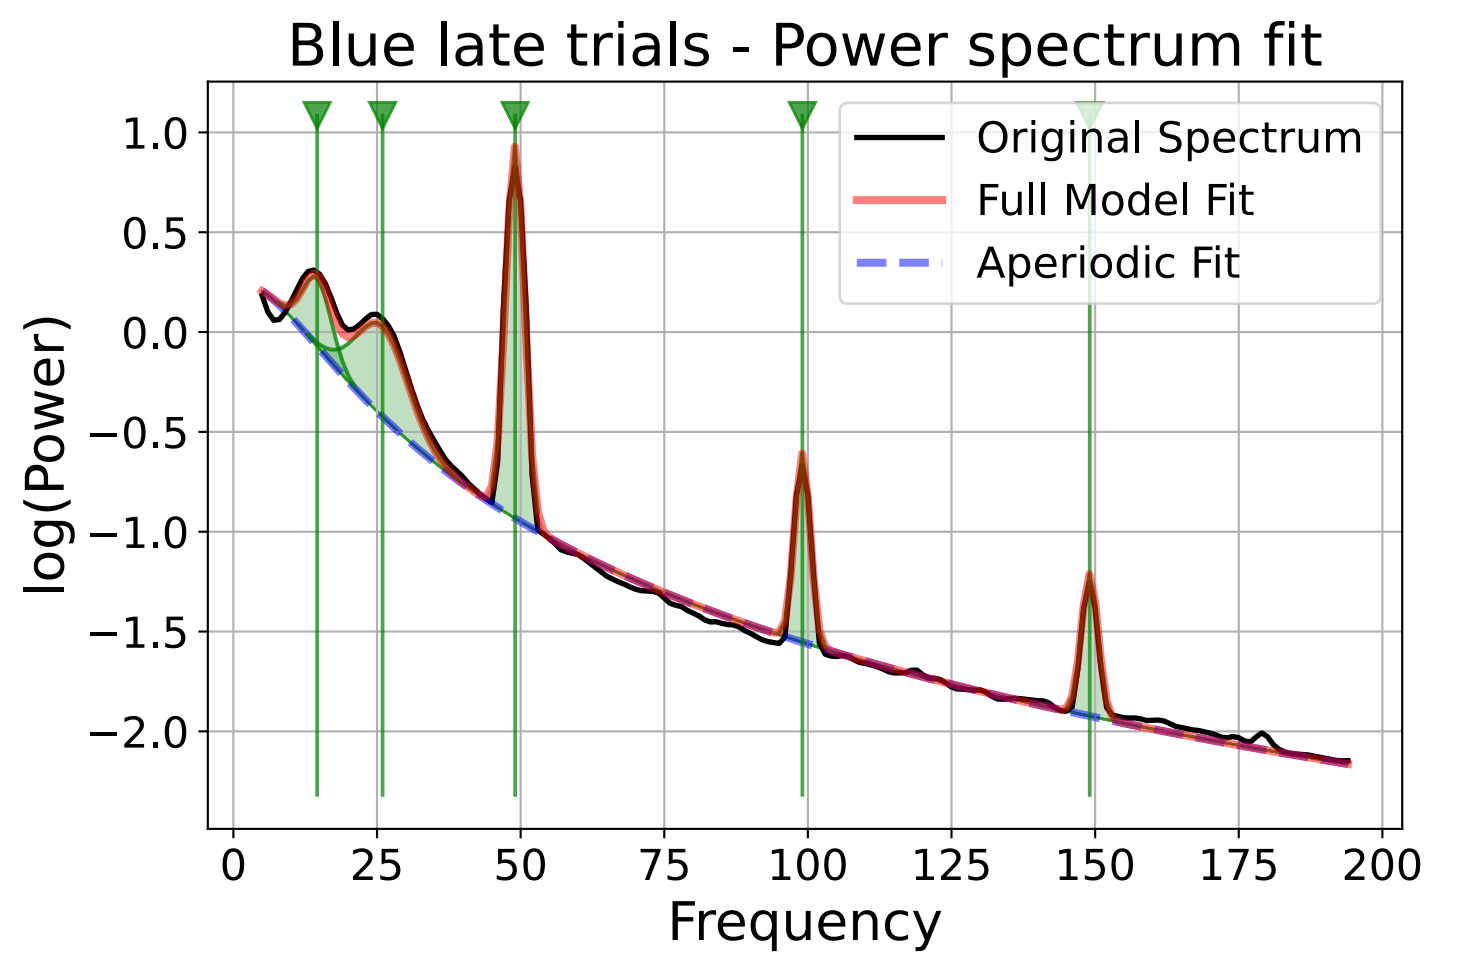

Monkey M

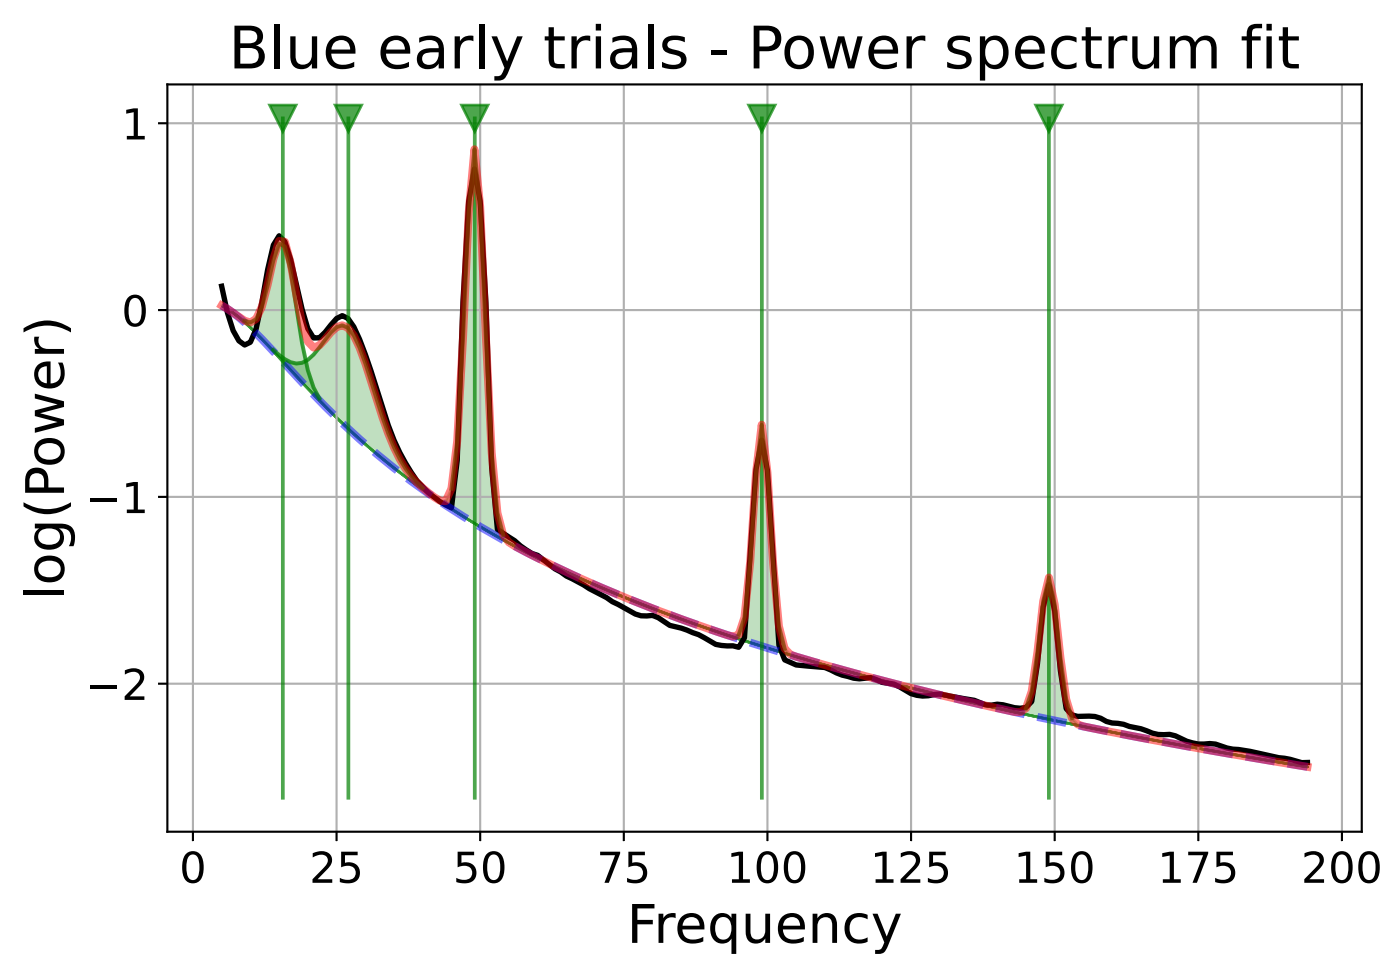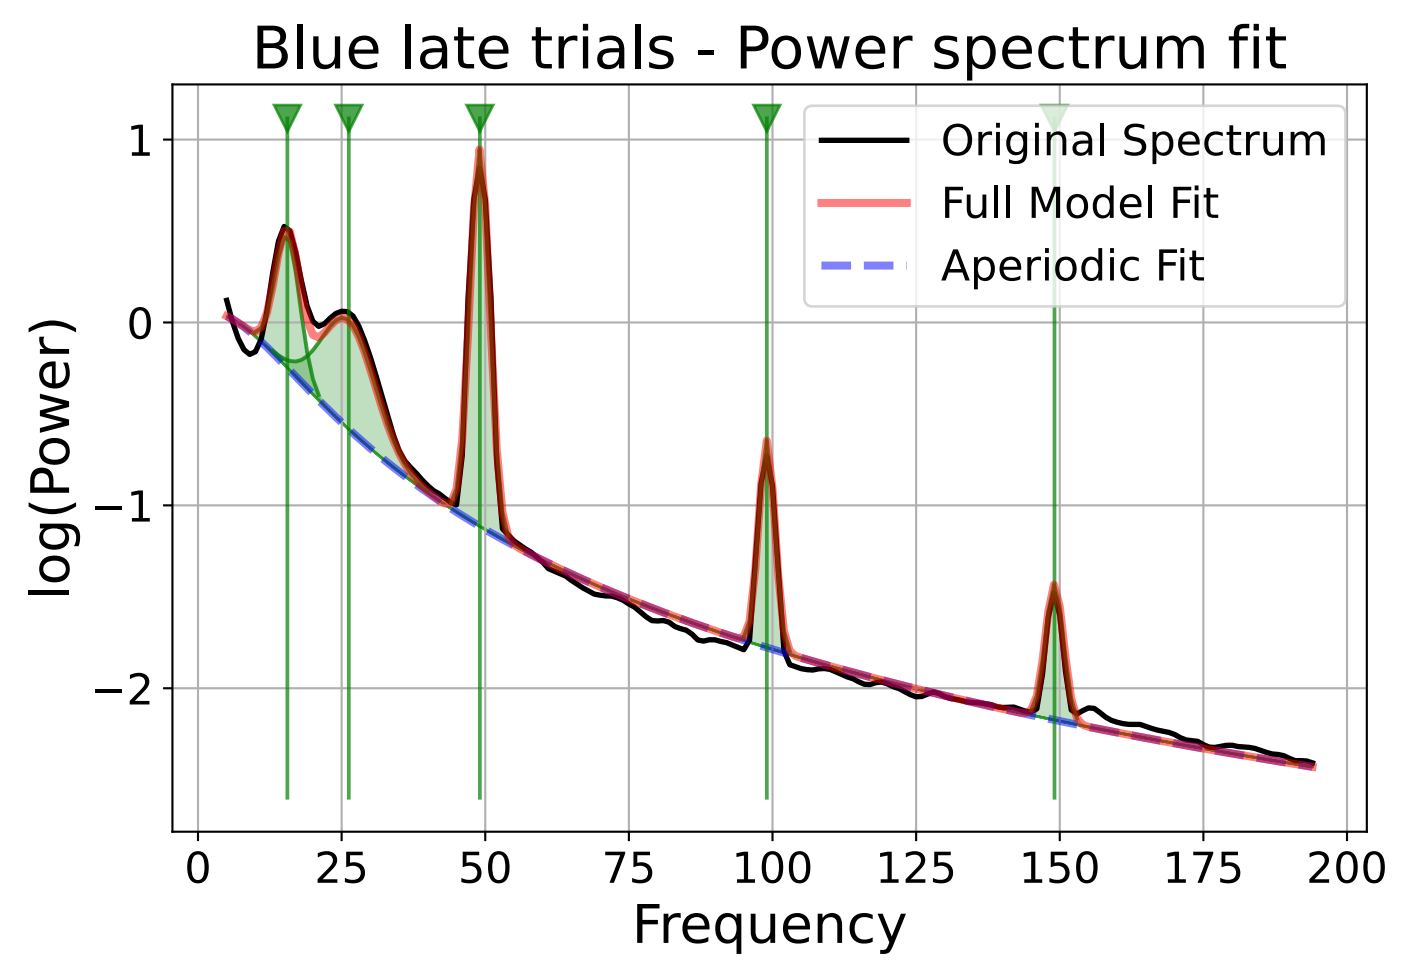

B

Monkey T

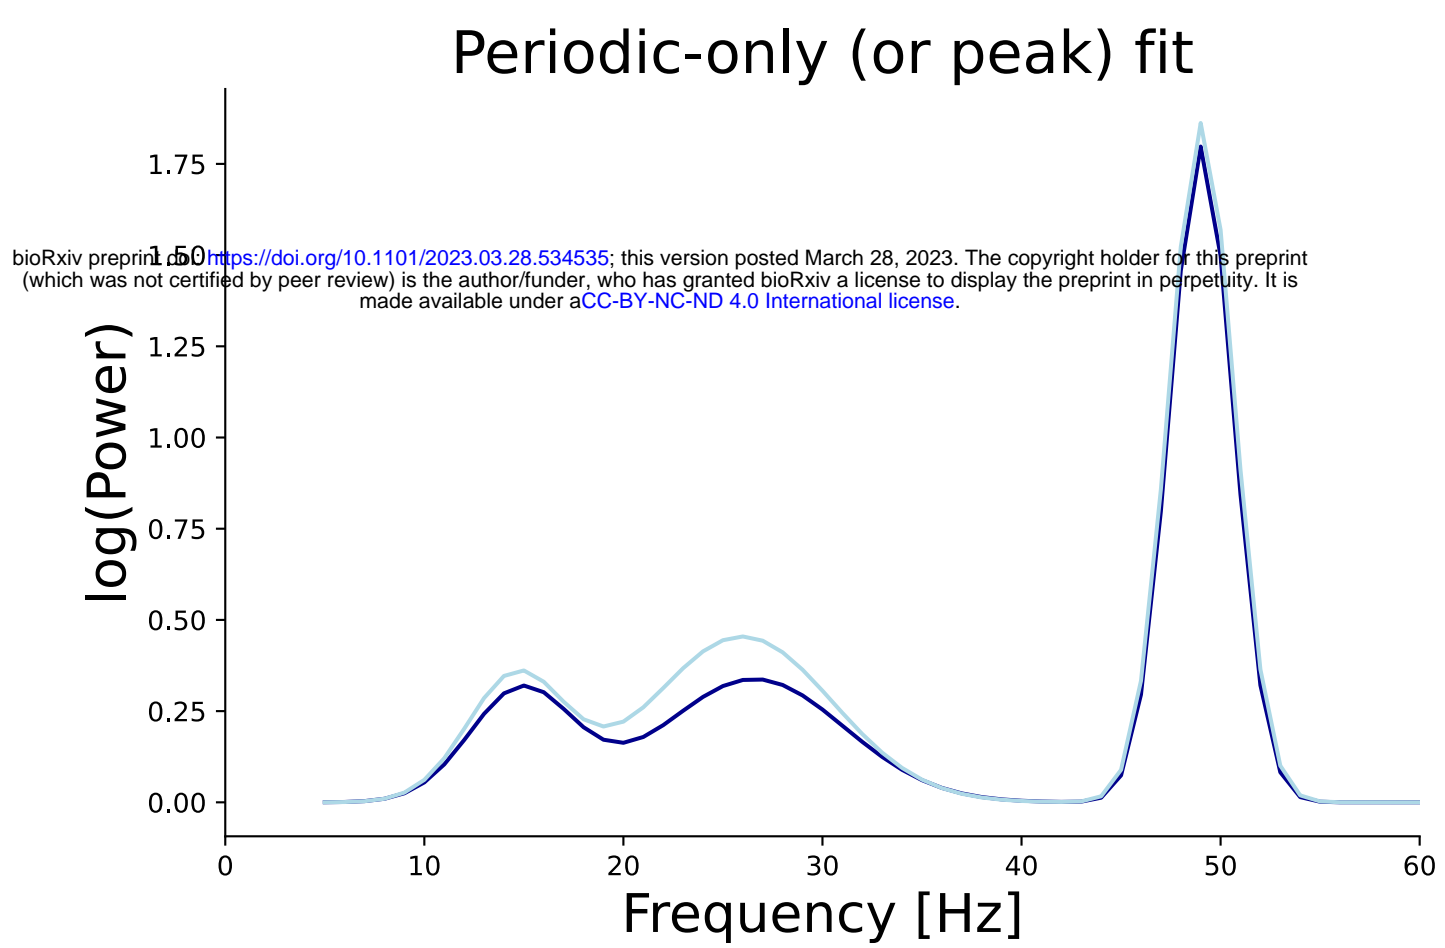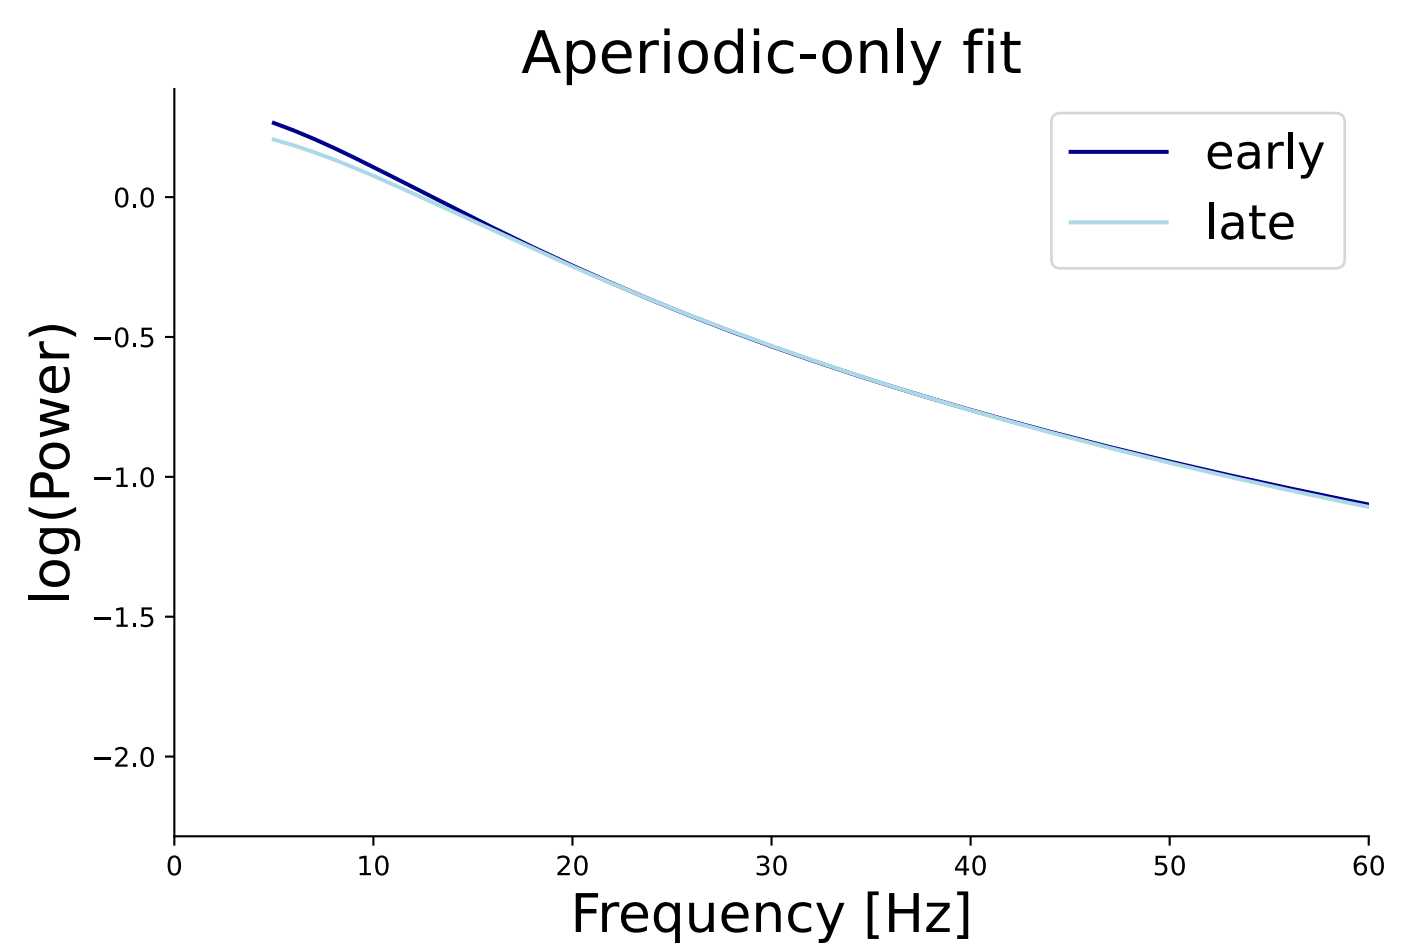

Monkey M

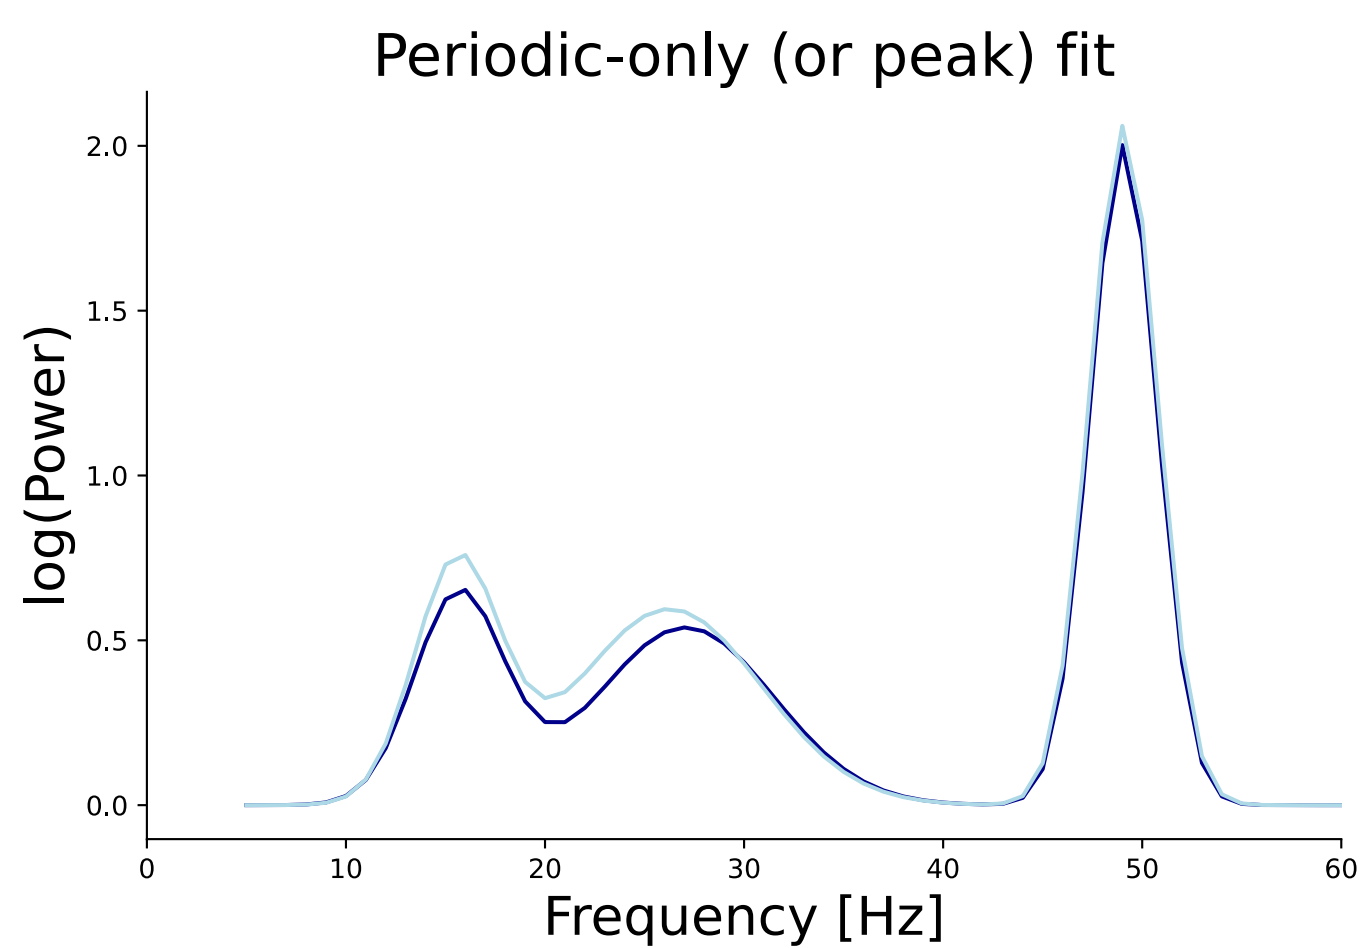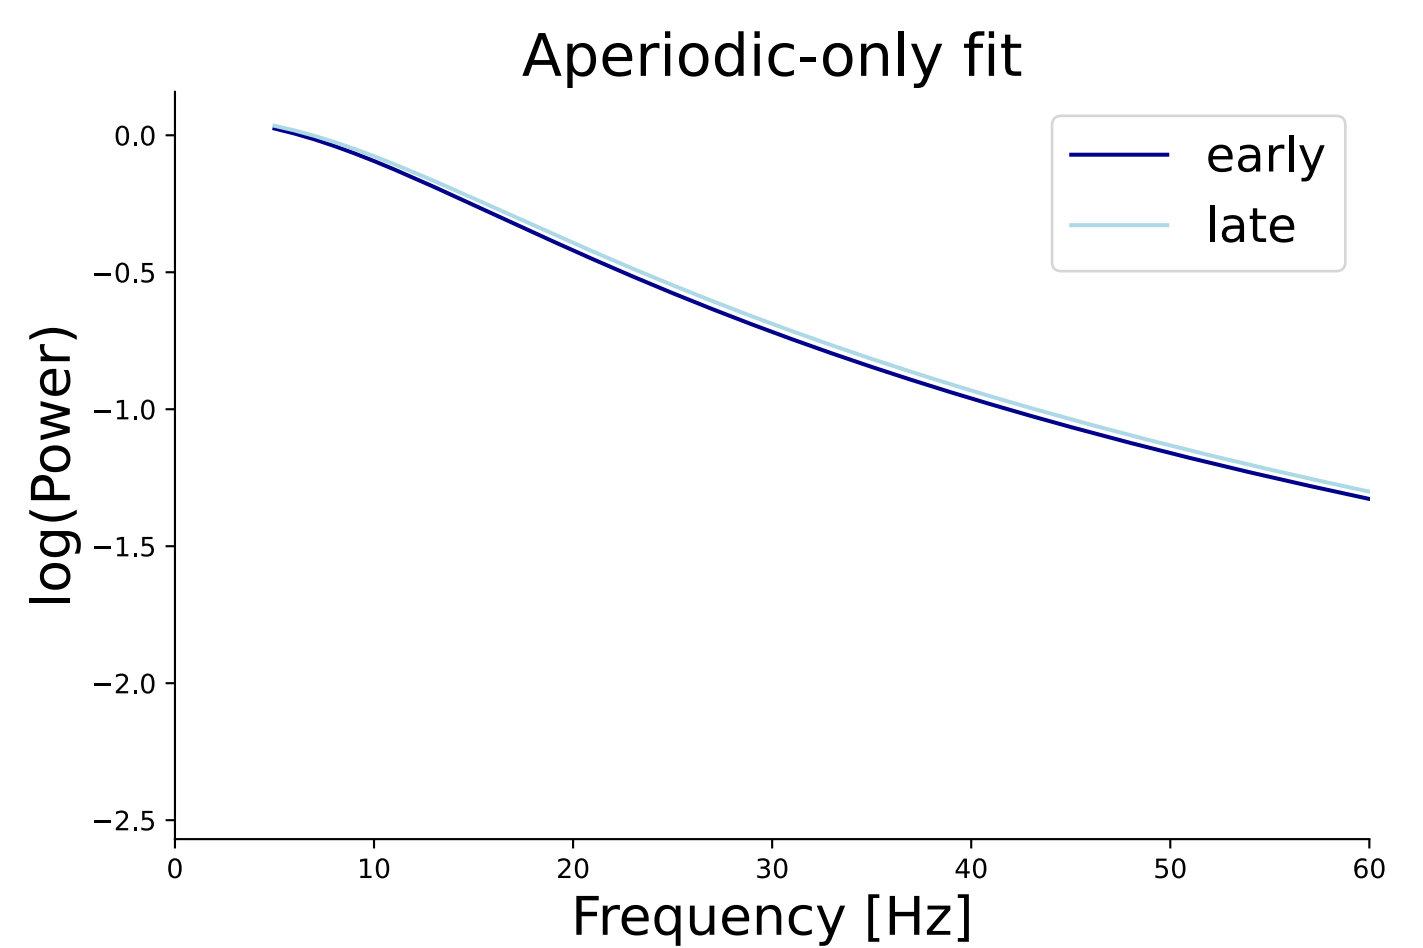

Suppl. Fig. 7. Spectral parametrization for early and late trials.

|                 | Number of behavioral trials for each color condition and movement direction |           |           |           |           |            |           |
|-----------------|-----------------------------------------------------------------------------|-----------|-----------|-----------|-----------|------------|-----------|
|                 | Blue                                                                        | Green     | Pink      | UR        | LR        | LL         | UL        |
| <b>Monkey T</b> | 2261                                                                        | 1987      | 1766      | 1556      | 1647      | 1577       | 1234      |
| <b>Monkey M</b> | 2109                                                                        | 1821      | 1643      | 1396      | 1406      | 1383       | 1388      |
|                 | Proportion of distractor errors (% of correct+distractor)                   |           |           |           |           |            |           |
|                 | Blue                                                                        | Green     | Pink      | UR        | LR        | LL         | UL        |
| <b>Monkey T</b> | 20.7                                                                        | 20.4      | 16.7      | 19.4      | 16.8      | 18.6       | 23.7      |
| <b>Monkey M</b> | 30.8                                                                        | 27.3      | 11.2      | 27.1      | 23.5      | 23.9       | 24.2      |
|                 | Reaction times in correct trials, from hand trajectories (ms)               |           |           |           |           |            |           |
|                 | Blue                                                                        | Green     | Pink      | UR        | LR        | LL         | UL        |
| <b>Monkey T</b> | 150 +/-40                                                                   | 152 +/-39 | 147 +/-50 | 150 +/-50 | 150 +/-38 | 147 +/- 37 | 152 +/-46 |
| <b>Monkey M</b> | 173 +/-57                                                                   | 169 +/-58 | 153 +/-65 | 170 +/-57 | 150 +/-62 | 163 +/-60  | 179 +/-59 |

**Suppl. Table 1.** Summary of number of trials included for behavioral analyses, percent of distractor errors and RTs for each color condition and movement direction for each animal. UR-upper right; LR-lower right; LL-lower left; UL-upper left.
